# Supplementary material
Source: publisher figshare collection journal article supplement (https://gsajournals.figshare.com/articles/dataset/_/8852180)

Figure S2

Mouse monoclonal anti-HA antibody, Cat. No.: 12CA5 (Merck/Sigma-Aldrich)

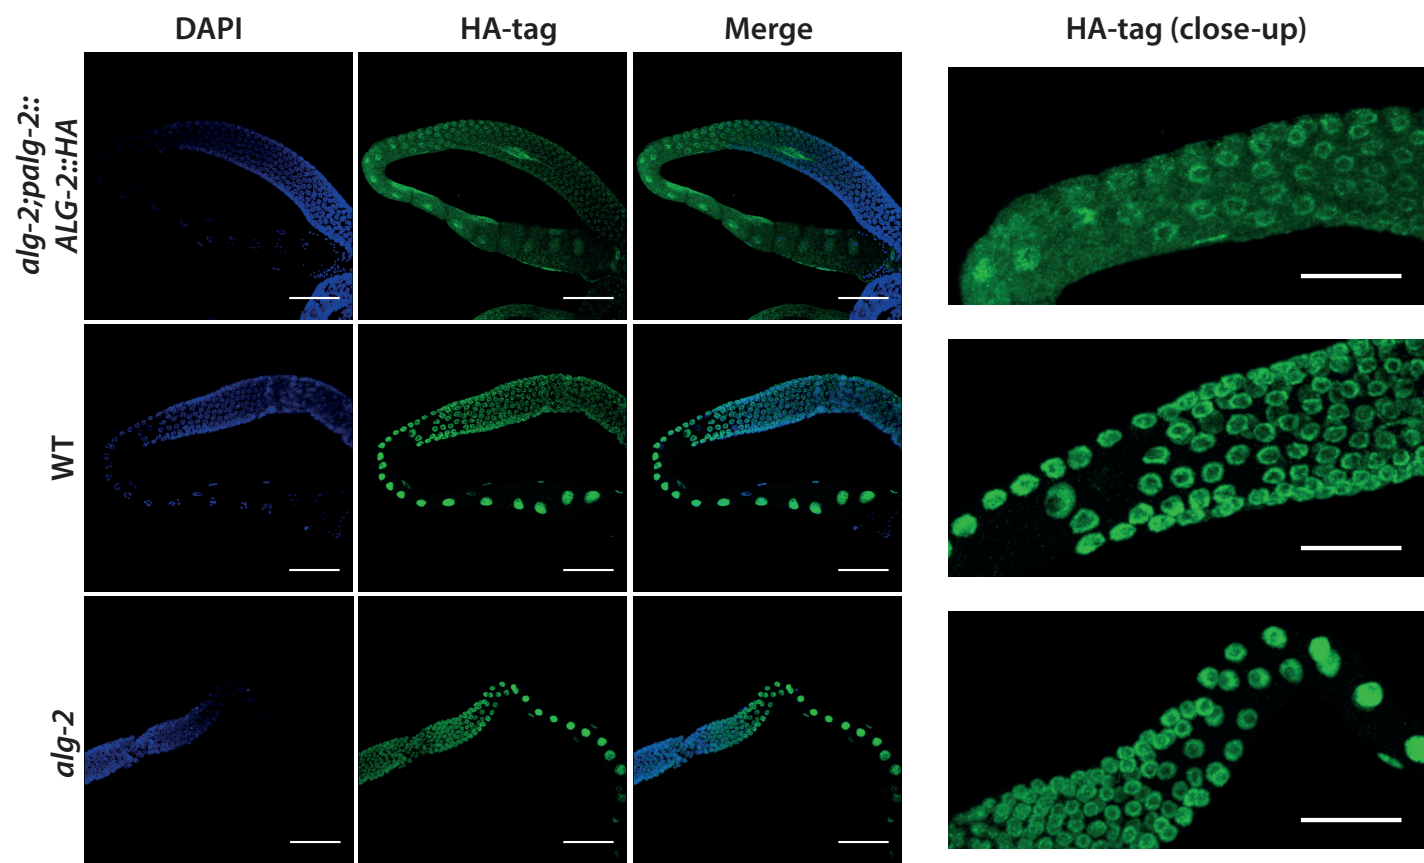

Rabbit polyclonal anti-HA antibody , Cat. No.: H6908 (Merck/Sigma-Aldrich)

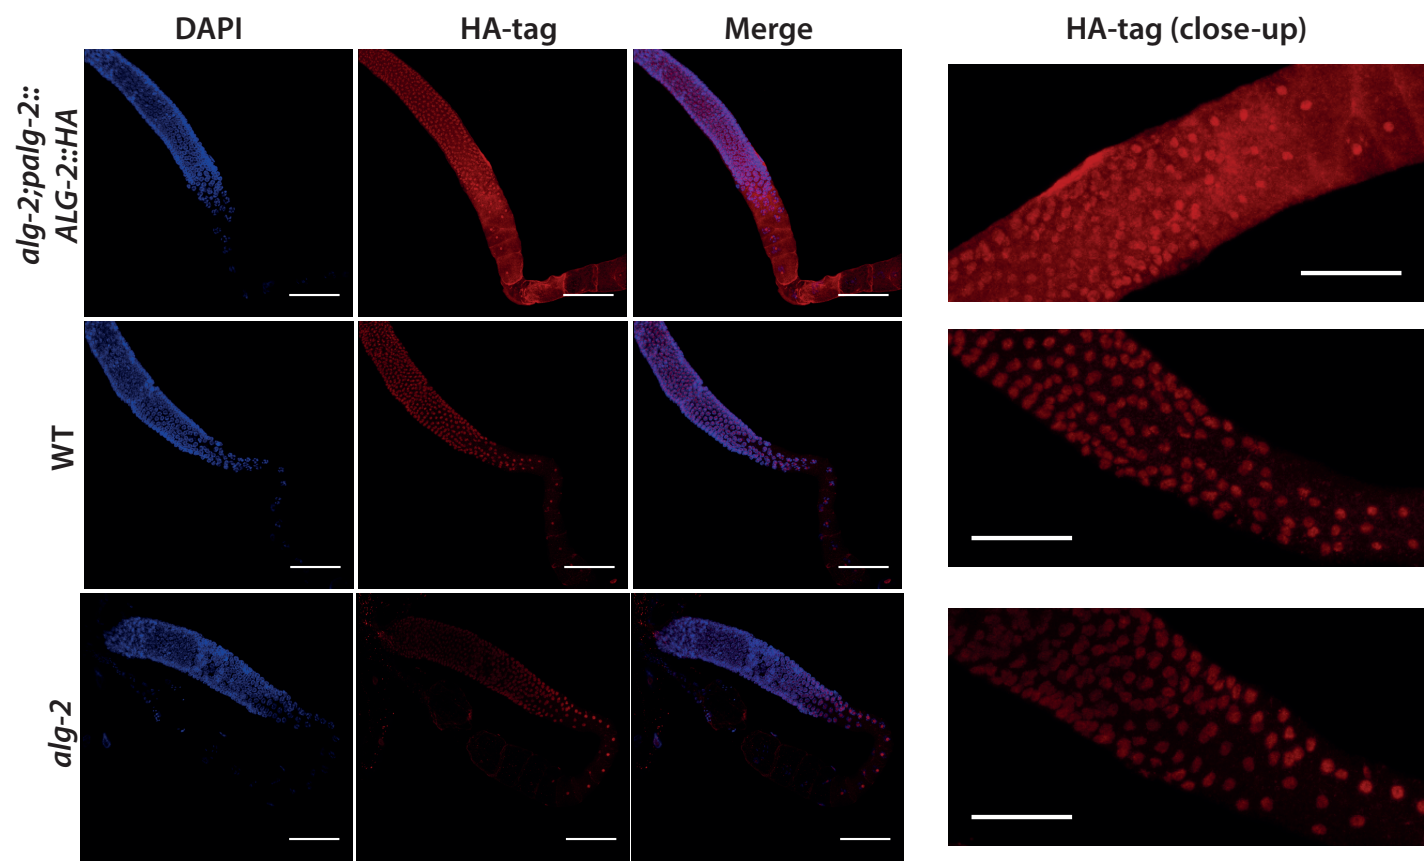

Supplement: Supplementary file 2 [file 1]
