# Supplementary material
Source: publisher figshare collection journal article supplement (https://gsajournals.figshare.com/articles/dataset/_/8852180)
Supplement: Supplementary file 8 [file 1]

| miRBaseID    | MatureSymbol    | FoldChange N2 IR/N2 NT | pValue   |
|--------------|-----------------|------------------------|----------|
| MIMAT0020306 | cel-miR-39-5p   | -1,47                  | 0        |
| MIMAT0032811 | cel-miR-8199-5p | <b>-2,22</b>           | <b>0</b> |
| MIMAT0020771 | cel-miR-44-5p   | -1,54                  | 0        |
| MIMAT0020320 | cel-miR-74-5p   | -1,42                  | 0        |
| MIMAT0000009 | cel-miR-38-3p   | -1,28                  | 0        |
| MIMAT0000295 | cel-miR-239b-5p | 1,35                   | 0        |
| MIMAT0015095 | cel-miR-42-5p   | -1,6                   | 0        |
| MIMAT0020311 | cel-miR-52-3p   | -1,32                  | 0,000005 |
| MIMAT0000305 | cel-miR-249-3p  | 1,19                   | 0,000031 |
| MIMAT0000007 | cel-miR-36-3p   | -1,14                  | 0,00004  |
| MIMAT0015093 | cel-miR-34-3p   | 1,13                   | 0,000087 |
| MIMAT0015094 | cel-miR-37-5p   | -1,19                  | 0,000125 |
| MIMAT0020000 | cel-miR-4813-5p | -1,36                  | 0,00027  |
| MIMAT0000299 | cel-miR-243-3p  | 1,13                   | 0,00031  |
| MIMAT0015105 | cel-miR-64-3p   | -1,26                  | 0,000397 |
| MIMAT0020304 | cel-miR-36-5p   | -1,2                   | 0,000587 |
| MIMAT0000302 | cel-miR-246-3p  | 1,1                    | 0,001142 |
| MIMAT0020774 | cel-miR-77-5p   | -1,16                  | 0,002137 |
| MIMAT0000293 | cel-miR-238-3p  | 1,09                   | 0,002223 |
| MIMAT0000290 | cel-miR-235-3p  | 1,12                   | 0,002797 |
| MIMAT0020339 | cel-miR-250-5p  | -1,17                  | 0,003178 |
| MIMAT0000031 | cel-miR-59-3p   | 1,09                   | 0,003431 |
| MIMAT0015109 | cel-miR-81-5p   | -1,27                  | 0,00346  |
| MIMAT0000001 | cel-let-7-5p    | 1,09                   | 0,004686 |
| MIMAT0000042 | cel-miR-70-3p   | 1,09                   | 0,004744 |
| MIMAT0000294 | cel-miR-239a-5p | 1,09                   | 0,005624 |
| MIMAT0015117 | cel-miR-243-5p  | 1,11                   | 0,006767 |
| MIMAT0000005 | cel-miR-34-5p   | 1,09                   | 0,007856 |
| MIMAT0000049 | cel-miR-77-3p   | 1,11                   | 0,008363 |
| MIMAT0015116 | cel-miR-240-5p  | 1,1                    | 0,009434 |
| MIMAT0000061 | cel-miR-90-3p   | 1,08                   | 0,010932 |
| MIMAT0000057 | cel-miR-84-5p   | 1,09                   | 0,011129 |
| MIMAT0020310 | cel-miR-50-3p   | -1,27                  | 0,011605 |
| MIMAT0032016 | cel-miR-789-5p  | 1,12                   | 0,012217 |
| MIMAT0020301 | cel-miR-1-5p    | -1,18                  | 0,015052 |
| MIMAT0015099 | cel-miR-51-3p   | -1,18                  | 0,015178 |
| MIMAT0004228 | cel-miR-793     | 1,16                   | 0,015676 |
| MIMAT0000699 | cel-miR-357-3p  | 1,16                   | 0,016539 |
| MIMAT0015103 | cel-miR-61-5p   | -1,11                  | 0,019237 |
| MIMAT0000044 | cel-miR-72-5p   | 1,06                   | 0,020015 |
| MIMAT0020317 | cel-miR-70-5p   | -1,21                  | 0,020213 |
| MIMAT0000045 | cel-miR-73-3p   | -1,07                  | 0,023051 |
| MIMAT0020315 | cel-miR-66-3p   | -1,21                  | 0,024193 |
| MIMAT0032827 | cel-miR-8205-5p | -1,15                  | 0,025623 |
| MIMAT0000033 | cel-miR-61-3p   | 1,08                   | 0,025966 |

|              |                  |       |          |
|--------------|------------------|-------|----------|
| MIMAT0032815 | cel-miR-8201-5p  | -1,27 | 0,028548 |
| MIMAT0000019 | cel-miR-48-5p    | 1,06  | 0,02953  |
| MIMAT0006768 | cel-miR-1828     | 1,27  | 0,029728 |
| MIMAT0032816 | cel-miR-8201-3p  | -1,16 | 0,029797 |
| MIMAT0020307 | cel-miR-40-5p    | -1,26 | 0,032561 |
| MIMAT0015118 | cel-miR-244-3p   | -1,26 | 0,035637 |
| MIMAT0000308 | cel-miR-252-5p   | 1,1   | 0,036321 |
| MIMAT0020303 | cel-miR-35-5p    | -1,16 | 0,036668 |
| MIMAT0011439 | cel-miR-2212-5p  | 1,12  | 0,038407 |
| MIMAT0011432 | cel-miR-2209a-3p | 1,14  | 0,042118 |
| MIMAT0020319 | cel-miR-73-5p    | -1,25 | 0,044785 |
| MIMAT0015241 | cel-miR-797-3p   | -1,21 | 0,047199 |
| MIMAT0019994 | cel-miR-4809-3p  | -1,23 | 0,047751 |
| MIMAT0000003 | cel-miR-1-3p     | 1,09  | 0,059213 |
| MIMAT0000013 | cel-miR-42-3p    | -1,22 | 0,059405 |
| MIMAT0000043 | cel-miR-71-5p    | 1,07  | 0,05993  |
| MIMAT0022305 | cel-miR-5592-5p  | 1,06  | 0,060591 |
| MIMAT0015104 | cel-miR-63-5p    | 1,08  | 0,060778 |
| MIMAT0000055 | cel-miR-82-3p    | 1,02  | 0,067254 |
| MIMAT0020323 | cel-miR-82-5p    | -1,17 | 0,070642 |
| MIMAT0000054 | cel-miR-81-3p    | 1,05  | 0,073521 |
| MIMAT0020143 | cel-miR-4937     | 1,17  | 0,076033 |
| MIMAT0004226 | cel-miR-791-3p   | -1,21 | 0,086779 |
| MIMAT0020349 | cel-miR-790-3p   | 1,12  | 0,087032 |
| MIMAT0000029 | cel-miR-57-5p    | 1,04  | 0,088491 |
| MIMAT0019997 | cel-miR-4811-3p  | -1,19 | 0,088842 |
| MIMAT0032017 | cel-miR-789-2-5p | -1,08 | 0,093423 |
| MIMAT0004222 | cel-miR-787-3p   | -1,11 | 0,09396  |
| MIMAT0011456 | cel-miR-2218a-3p | 1,06  | 0,097937 |
| MIMAT0005822 | cel-miR-1019-5p  | 1,06  | 0,098065 |
| MIMAT0000008 | cel-miR-37-3p    | -1,09 | 0,101676 |
| MIMAT0004220 | cel-miR-785-3p   | 1,05  | 0,10315  |
| MIMAT0006584 | cel-miR-1817     | 1,11  | 0,105442 |
| MIMAT0000050 | cel-miR-78       | 1,09  | 0,10658  |
| MIMAT0000298 | cel-miR-242      | -1,06 | 0,106782 |
| MIMAT0000284 | cel-miR-229-5p   | 1,07  | 0,112655 |
| MIMAT0000010 | cel-miR-39-3p    | -1,05 | 0,114732 |
| MIMAT0000060 | cel-miR-87-3p    | 1,06  | 0,123353 |
| MIMAT0000700 | cel-miR-358-3p   | 1,09  | 0,124248 |
| MIMAT0006772 | cel-miR-1830-5p  | -1,13 | 0,124553 |
| MIMAT0020337 | cel-miR-246-5p   | 1,1   | 0,126235 |
| MIMAT0000310 | cel-miR-254-3p   | -1,19 | 0,127042 |
| MIMAT0004216 | cel-miR-255-3p   | 1,17  | 0,130284 |
| MIMAT0011427 | cel-miR-2208a-5p | -1,16 | 0,130601 |
| MIMAT0000307 | cel-miR-251      | -1,17 | 0,136564 |
| MIMAT0000014 | cel-miR-43-3p    | -1,13 | 0,138245 |

|              |                  |       |          |
|--------------|------------------|-------|----------|
| MIMAT0004219 | cel-miR-784-5p   | -1,18 | 0,139429 |
| MIMAT0000006 | cel-miR-35-3p    | -1,15 | 0,139627 |
| MIMAT0006590 | cel-miR-1823-3p  | -1,08 | 0,141963 |
| MIMAT0006771 | cel-miR-1829c-5p | 1,05  | 0,14237  |
| MIMAT0020350 | cel-miR-791-5p   | 1,14  | 0,142597 |
| MIMAT0022312 | cel-miR-356b-3p  | 1,1   | 0,145492 |
| MIMAT0004229 | cel-miR-794-5p   | 1,05  | 0,156198 |
| MIMAT0020773 | cel-miR-54-5p    | -1,05 | 0,157604 |
| MIMAT0006586 | cel-miR-1819-3p  | 1,17  | 0,159529 |
| MIMAT0022198 | cel-miR-5553-3p  | -1,06 | 0,159855 |
| MIMAT0000301 | cel-miR-245-3p   | 1,05  | 0,160225 |
| MIMAT0000697 | cel-miR-355-5p   | 1,06  | 0,160498 |
| MIMAT0015119 | cel-miR-247-5p   | 1,11  | 0,162466 |
| MIMAT0000325 | cel-miR-269      | -1,05 | 0,164836 |
| MIMAT0022310 | cel-miR-5594-3p  | 1,14  | 0,165379 |
| MIMAT0011463 | cel-miR-2221     | 1,11  | 0,169743 |
| MIMAT0032812 | cel-miR-8199-3p  | -1,04 | 0,178941 |
| MIMAT0019989 | cel-miR-4806-3p  | -1,12 | 0,181493 |
| MIMAT0000012 | cel-miR-41-3p    | -1,13 | 0,184054 |
| MIMAT0032821 | cel-miR-4810b-5p | -1,04 | 0,189216 |
| MIMAT0022195 | cel-miR-5552-5p  | 1,15  | 0,190644 |
| MIMAT0032843 | cel-miR-8211-3p  | -1,07 | 0,193027 |
| MIMAT0000052 | cel-miR-80-5p    | -1,04 | 0,195943 |
| MIMAT0000291 | cel-miR-236-3p   | 1,04  | 0,196348 |
| MIMAT0015239 | cel-miR-786-5p   | 1,14  | 0,196586 |
| MIMAT0004233 | cel-miR-798      | 1,1   | 0,199012 |
| MIMAT0004232 | cel-miR-797-5p   | 1,15  | 0,201139 |
| MIMAT0022182 | cel-miR-5545-3p  | -1,13 | 0,201348 |
| MIMAT0000701 | cel-miR-359      | 1,06  | 0,215036 |
| MIMAT0000024 | cel-miR-53-5p    | -1,06 | 0,21615  |
| MIMAT0022197 | cel-miR-5553-5p  | 1,1   | 0,216525 |
| MIMAT0020322 | cel-miR-79-5p    | -1,13 | 0,216564 |
| MIMAT0005523 | cel-miR-1022-5p  | 1,05  | 0,218659 |
| MIMAT0000021 | cel-miR-50-5p    | 1,04  | 0,219281 |
| MIMAT0004221 | cel-miR-786-3p   | -1,15 | 0,222929 |
| MIMAT0015115 | cel-miR-239b-3p  | 1,04  | 0,225486 |
| MIMAT0000039 | cel-miR-67-3p    | -1,09 | 0,229035 |
| MIMAT0000022 | cel-miR-51-5p    | -1,12 | 0,237047 |
| MIMAT0032799 | cel-miR-8193-5p  | -1,13 | 0,238185 |
| MIMAT0020770 | cel-miR-41-5p    | 1,06  | 0,239405 |
| MIMAT0020004 | cel-miR-4815     | -1,04 | 0,239512 |
| MIMAT0000285 | cel-miR-230-3p   | -1,14 | 0,242664 |
| MIMAT0000011 | cel-miR-40-3p    | -1,14 | 0,244561 |
| MIMAT0000018 | cel-miR-47-3p    | -1,07 | 0,245086 |
| MIMAT0019991 | cel-miR-4808-5p  | 1,04  | 0,254097 |
| MIMAT0000020 | cel-miR-49-3p    | -1,1  | 0,257374 |

|              |                  |       |          |
|--------------|------------------|-------|----------|
| MIMAT0000309 | cel-miR-253-5p   | -1,13 | 0,257762 |
| MIMAT0000032 | cel-miR-60-3p    | 1,06  | 0,261107 |
| MIMAT0020776 | cel-miR-86-3p    | -1,06 | 0,261789 |
| MIMAT0020330 | cel-miR-234-5p   | -1,06 | 0,264118 |
| MIMAT0032820 | cel-miR-8203-3p  | 1,05  | 0,269627 |
| MIMAT0020006 | cel-miR-4816-3p  | 1,09  | 0,270915 |
| MIMAT0000028 | cel-miR-56-3p    | -1,11 | 0,272431 |
| MIMAT0022311 | cel-miR-356b-5p  | 1,09  | 0,274976 |
| MIMAT0000282 | cel-miR-124-3p   | 1,08  | 0,276518 |
| MIMAT0000289 | cel-miR-234-3p   | -1,12 | 0,276632 |
| MIMAT0020001 | cel-miR-4813-3p  | 1,06  | 0,278485 |
| MIMAT0000025 | cel-miR-54-3p    | -1,12 | 0,279748 |
| MIMAT0000046 | cel-miR-74-3p    | -1,05 | 0,280533 |
| MIMAT0004224 | cel-miR-789-3p   | -1,11 | 0,281547 |
| MIMAT0000292 | cel-miR-237-5p   | 1,03  | 0,282658 |
| MIMAT0011438 | cel-miR-2211-3p  | -1,06 | 0,283291 |
| MIMAT0020356 | cel-miR-1020-5p  | 1,09  | 0,286514 |
| MIMAT0032796 | cel-miR-8191-3p  | -1,03 | 0,290008 |
| MIMAT0022184 | cel-miR-5546-3p  | -1,12 | 0,290447 |
| MIMAT0020135 | cel-miR-4929     | -1,13 | 0,292368 |
| MIMAT0015113 | cel-miR-230-5p   | 1,04  | 0,29455  |
| MIMAT0020327 | cel-miR-228-3p   | 1,09  | 0,29746  |
| MIMAT0000026 | cel-miR-55-3p    | -1,12 | 0,300769 |
| MIMAT0011442 | cel-miR-2213-3p  | -1,03 | 0,303954 |
| MIMAT0022183 | cel-miR-5546-5p  | -1,03 | 0,303954 |
| MIMAT0000023 | cel-miR-52-5p    | -1,04 | 0,305    |
| MIMAT0000048 | cel-miR-76-3p    | 1,06  | 0,305393 |
| MIMAT0032803 | cel-miR-8195-5p  | 1,06  | 0,3077   |
| MIMAT0020140 | cel-miR-4934     | 1,02  | 0,318021 |
| MIMAT0020775 | cel-miR-83-5p    | -1,11 | 0,319471 |
| MIMAT0004223 | cel-miR-788-5p   | -1,07 | 0,319521 |
| MIMAT0000288 | cel-miR-233-3p   | 1,05  | 0,325698 |
| MIMAT0020326 | cel-miR-90-5p    | -1,08 | 0,327537 |
| MIMAT0000296 | cel-miR-240-3p   | -1,06 | 0,329122 |
| MIMAT0020002 | cel-miR-4814-5p  | 1,1   | 0,32968  |
| MIMAT0006587 | cel-miR-1820-5p  | -1,04 | 0,333349 |
| MIMAT0000306 | cel-miR-250-3p   | 1,03  | 0,337201 |
| MIMAT0020308 | cel-miR-43-5p    | -1,1  | 0,342577 |
| MIMAT0020130 | cel-miR-4924     | -1,04 | 0,345769 |
| MIMAT0000303 | cel-miR-247-3p   | 1,11  | 0,346469 |
| MIMAT0006589 | cel-miR-1822-3p  | 1,06  | 0,348837 |
| MIMAT0000027 | cel-miR-56-5p    | -1,04 | 0,349888 |
| MIMAT0032809 | cel-miR-8198-5p  | 1,02  | 0,351084 |
| MIMAT0006770 | cel-miR-1829b-5p | -1,03 | 0,351671 |
| MIMAT0020305 | cel-miR-38-5p    | -1,1  | 0,369239 |
| MIMAT0032840 | cel-miR-2217b-3p | -1,1  | 0,376857 |

|              |                  |       |          |
|--------------|------------------|-------|----------|
| MIMAT0000696 | cel-miR-354-3p   | -1,02 | 0,376939 |
| MIMAT0022186 | cel-miR-5547-3p  | -1,1  | 0,377981 |
| MIMAT0015267 | cel-miR-1829a-5p | -1,07 | 0,379028 |
| MIMAT0015114 | cel-miR-238-5p   | 1,04  | 0,38055  |
| MIMAT0000038 | cel-miR-66-5p    | -1,04 | 0,385398 |
| MIMAT0032826 | cel-miR-8196b-3p | -1,09 | 0,392401 |
| MIMAT0000283 | cel-miR-228-5p   | -1,09 | 0,394951 |
| MIMAT0022314 | cel-miR-5595-3p  | -1,02 | 0,397518 |
| MIMAT0032823 | cel-miR-8204-5p  | -1,02 | 0,397518 |
| MIMAT0019998 | cel-miR-4812-5p  | 1,09  | 0,398458 |
| MIMAT0020312 | cel-miR-53-3p    | -1,09 | 0,399236 |
| MIMAT0032804 | cel-miR-8195-3p  | -1,06 | 0,400217 |
| MIMAT0000034 | cel-miR-62       | 1,05  | 0,40213  |
| MIMAT0020334 | cel-miR-239a-3p  | 1,05  | 0,409839 |
| MIMAT0020144 | cel-miR-4938     | 1,01  | 0,412757 |
| MIMAT0000056 | cel-miR-83-3p    | -1,09 | 0,416265 |
| MIMAT0005033 | cel-miR-1020-3p  | 1,06  | 0,418963 |
| MIMAT0020336 | cel-miR-245-5p   | 1,04  | 0,418991 |
| MIMAT0000304 | cel-miR-248      | 1,02  | 0,420756 |
| MIMAT0020360 | cel-miR-1824-3p  | -1,06 | 0,423456 |
| MIMAT0000051 | cel-miR-79-3p    | -1,04 | 0,424235 |
| MIMAT0006591 | cel-miR-1824-5p  | 1,09  | 0,424669 |
| MIMAT0020128 | cel-miR-4922     | 1,08  | 0,426728 |
| MIMAT0015091 | cel-let-7-3p     | 1,09  | 0,429874 |
| MIMAT0019986 | cel-miR-4805-5p  | -1,01 | 0,432146 |
| MIMAT0011440 | cel-miR-2212-3p  | -1,01 | 0,438284 |
| MIMAT0015107 | cel-miR-71-3p    | 1,04  | 0,4404   |
| MIMAT0032785 | cel-miR-8186-5p  | 1,06  | 0,441427 |
| MIMAT0032818 | cel-miR-8202-3p  | 1,01  | 0,447514 |
| MIMAT0020772 | cel-miR-45-5p    | -1,04 | 0,449128 |
| MIMAT0020127 | cel-miR-4921     | 1,01  | 0,44938  |
| MIMAT0000004 | cel-miR-2-3p     | -1,04 | 0,450943 |
| MIMAT0006588 | cel-miR-1821-3p  | -1,06 | 0,456954 |
| MIMAT0032845 | cel-miR-8212-3p  | 1,09  | 0,456966 |
| MIMAT0020313 | cel-miR-55-5p    | -1,06 | 0,464874 |
| MIMAT0020005 | cel-miR-4816-5p  | 1,06  | 0,465702 |
| MIMAT0015111 | cel-miR-124-5p   | 1,07  | 0,466739 |
| MIMAT0020302 | cel-miR-2-5p     | 1,07  | 0,466742 |
| MIMAT0020316 | cel-miR-67-5p    | 1,08  | 0,467084 |
| MIMAT0019999 | cel-miR-4812-3p  | 1,05  | 0,472176 |
| MIMAT0011461 | cel-miR-2220-5p  | -1,01 | 0,47258  |
| MIMAT0020133 | cel-miR-4926     | -1,01 | 0,47258  |
| MIMAT0004225 | cel-miR-790-5p   | -1,05 | 0,480069 |
| MIMAT0000297 | cel-miR-241-5p   | -1,07 | 0,480802 |
| MIMAT0032792 | cel-miR-8189-3p  | -1,07 | 0,482688 |
| MIMAT0000037 | cel-miR-65-5p    | 1,02  | 0,488171 |

|              |                  |       |          |
|--------------|------------------|-------|----------|
| MIMAT0015102 | cel-miR-60-5p    | -1,06 | 0,49178  |
| MIMAT0000053 | cel-miR-80-3p    | 1,03  | 0,498505 |
| MIMAT0020340 | cel-miR-252-3p   | 1,03  | 0,50752  |
| MIMAT0000059 | cel-miR-86-5p    | -1,03 | 0,508353 |
| MIMAT0020352 | cel-miR-794-3p   | -1,07 | 0,512614 |
| MIMAT0014447 | cel-miR-2953-3p  | 1,07  | 0,514663 |
| MIMAT0019987 | cel-miR-4805-3p  | 1,07  | 0,523301 |
| MIMAT0004234 | cel-miR-799      | -1,06 | 0,526554 |
| MIMAT0020333 | cel-miR-237-3p   | -1,04 | 0,533047 |
| MIMAT0032801 | cel-miR-8194-5p  | -1,01 | 0,538876 |
| MIMAT0032836 | cel-miR-8209-3p  | -1,01 | 0,538876 |
| MIMAT0031896 | cel-lsy-6-5p     | 1,01  | 0,539181 |
| MIMAT0032808 | cel-miR-8197-3p  | 1,01  | 0,539181 |
| MIMAT0032034 | cel-miR-1821-5p  | -1,04 | 0,53966  |
| MIMAT0020348 | cel-miR-787-5p   | -1,01 | 0,540283 |
| MIMAT0032793 | cel-miR-8190-5p  | -1,01 | 0,540283 |
| MIMAT0032798 | cel-miR-8192-3p  | -1,01 | 0,540283 |
| MIMAT0020126 | cel-miR-4920     | 1,06  | 0,541665 |
| MIMAT0020325 | cel-miR-87-5p    | 1,04  | 0,545302 |
| MIMAT0020138 | cel-miR-4932     | 1,02  | 0,546457 |
| MIMAT0032788 | cel-miR-8187-3p  | -1,01 | 0,548329 |
| MIMAT0032789 | cel-miR-8188-5p  | -1,01 | 0,548329 |
| MIMAT0000035 | cel-miR-63-3p    | 1,02  | 0,548487 |
| MIMAT0031891 | cel-miR-254-5p   | -1,04 | 0,553141 |
| MIMAT0032039 | cel-miR-1832a-5p | -1,06 | 0,553542 |
| MIMAT0015112 | cel-miR-229-3p   | -1,02 | 0,557025 |
| MIMAT0022193 | cel-miR-5551-5p  | 1,04  | 0,561905 |
| MIMAT0015098 | cel-miR-48-3p    | -1,03 | 0,564214 |
| MIMAT0015096 | cel-miR-46-5p    | 1,01  | 0,567077 |
| MIMAT0022309 | cel-miR-5594-5p  | -1,06 | 0,56973  |
| MIMAT0000030 | cel-miR-58a-3p   | 1,01  | 0,57429  |
| MIMAT0011451 | cel-miR-2217a-5p | -1,05 | 0,577676 |
| MIMAT0000058 | cel-miR-85-3p    | 1,02  | 0,583524 |
| MIMAT0020131 | cel-miR-4923b    | 1,03  | 0,586609 |
| MIMAT0032819 | cel-miR-8203-5p  | -1,01 | 0,589605 |
| MIMAT0032806 | cel-miR-8196a-3p | -1,05 | 0,58974  |
| MIMAT0011435 | cel-miR-2210-5p  | -1,04 | 0,597448 |
| MIMAT0019988 | cel-miR-4806-5p  | 1,06  | 0,597655 |
| MIMAT0015121 | cel-miR-360-5p   | 1,06  | 0,597802 |
| MIMAT0020353 | cel-miR-795-3p   | 1,04  | 0,598611 |
| MIMAT0011425 | cel-miR-2207-5p  | 1,04  | 0,605274 |
| MIMAT0020328 | cel-miR-231-5p   | -1,06 | 0,609606 |
| MIMAT0032842 | cel-miR-8211-5p  | 1,04  | 0,61619  |
| MIMAT0032822 | cel-miR-4810b-3p | -1,02 | 0,616732 |
| MIMAT0011454 | cel-miR-2209b-3p | 1,05  | 0,625424 |
| MIMAT0020347 | cel-miR-784-3p   | -1,05 | 0,626559 |

|              |                  |       |          |
|--------------|------------------|-------|----------|
| MIMAT0000749 | cel-lsy-6-3p     | 1,03  | 0,633457 |
| MIMAT0022191 | cel-miR-5550-5p  | -1,04 | 0,63489  |
| MIMAT0011448 | cel-miR-2216-3p  | -1,03 | 0,639195 |
| MIMAT0011436 | cel-miR-2210-3p  | -1,05 | 0,642147 |
| MIMAT0015266 | cel-miR-1822-5p  | 1,05  | 0,643622 |
| MIMAT0011452 | cel-miR-2217a-3p | 1,05  | 0,647211 |
| MIMAT0011441 | cel-miR-2213-5p  | 1,01  | 0,652454 |
| MIMAT0011462 | cel-miR-2220-3p  | 1,05  | 0,65271  |
| MIMAT0032829 | cel-miR-8206-5p  | 1,04  | 0,654163 |
| MIMAT0020335 | cel-miR-241-3p   | 1,04  | 0,658483 |
| MIMAT0000287 | cel-miR-232-3p   | 1,02  | 0,659953 |
| MIMAT0019990 | cel-miR-4807     | 1,04  | 0,660791 |
| MIMAT0000036 | cel-miR-64-5p    | 1,01  | 0,663062 |
| MIMAT0000322 | cel-miR-266      | -1,05 | 0,664446 |
| MIMAT0014446 | cel-miR-2953-5p  | 1,04  | 0,672856 |
| MIMAT0019996 | cel-miR-4811-5p  | -1,03 | 0,673642 |
| MIMAT0022181 | cel-miR-5545-5p  | 1,05  | 0,674326 |
| MIMAT0000015 | cel-miR-44-3p    | -1,01 | 0,674662 |
| MIMAT0000016 | cel-miR-45-3p    | -1,01 | 0,674662 |
| MIMAT0006774 | cel-miR-1832a-3p | 1,04  | 0,677335 |
| MIMAT0032794 | cel-miR-8190-3p  | -1,03 | 0,686618 |
| MIMAT0020142 | cel-miR-4936     | -1,04 | 0,687321 |
| MIMAT0011459 | cel-miR-2219-5p  | 1,04  | 0,691892 |
| MIMAT0022194 | cel-miR-5551-3p  | 1,01  | 0,698329 |
| MIMAT0011431 | cel-miR-2209a-5p | 1,03  | 0,702869 |
| MIMAT0015106 | cel-miR-65-3p    | -1,04 | 0,704622 |
| MIMAT0032037 | cel-miR-1829b-3p | -1,04 | 0,715752 |
| MIMAT0020778 | cel-miR-1830-3p  | 1,02  | 0,716663 |
| MIMAT0022196 | cel-miR-5552-3p  | 1,03  | 0,717073 |
| MIMAT0020361 | cel-miR-58b-5p   | -1,04 | 0,719975 |
| MIMAT0020129 | cel-miR-4923a    | -1,01 | 0,720312 |
| MIMAT0020342 | cel-miR-259-3p   | 1,02  | 0,723425 |
| MIMAT0015120 | cel-miR-358-5p   | -1,04 | 0,728695 |
| MIMAT0015110 | cel-miR-84-3p    | 1,01  | 0,729588 |
| MIMAT0032810 | cel-miR-8198-3p  | 1,04  | 0,735905 |
| MIMAT0020324 | cel-miR-85-5p    | 1,02  | 0,743467 |
| MIMAT0000314 | cel-miR-259-5p   | -1,02 | 0,74955  |
| MIMAT0032834 | cel-miR-8208-3p  | -1,04 | 0,751125 |
| MIMAT0011430 | cel-miR-2208b-3p | -1,04 | 0,751874 |
| MIMAT0004231 | cel-miR-796      | -1,01 | 0,75656  |
| MIMAT0020331 | cel-miR-235-5p   | 1,04  | 0,75997  |
| MIMAT0022307 | cel-miR-5593-5p  | 1,02  | 0,76441  |
| MIMAT0000047 | cel-miR-75-3p    | 1,02  | 0,766294 |
| MIMAT0022306 | cel-miR-5592-3p  | 1,01  | 0,770835 |
| MIMAT0015108 | cel-miR-75-5p    | 1,03  | 0,771328 |
| MIMAT0000286 | cel-miR-231-3p   | -1,02 | 0,771937 |

|              |                  |       |          |
|--------------|------------------|-------|----------|
| MIMAT0020309 | cel-miR-49-5p    | 1,02  | 0,773536 |
| MIMAT0022313 | cel-miR-5595-5p  | 1,01  | 0,775755 |
| MIMAT0011446 | cel-miR-2215-3p  | 1,01  | 0,77674  |
| MIMAT0011450 | cel-miR-1832b-3p | -1,01 | 0,783144 |
| MIMAT0006769 | cel-miR-1829a-3p | -1,03 | 0,786177 |
| MIMAT0032791 | cel-miR-8189-5p  | -1,01 | 0,788301 |
| MIMAT0032038 | cel-miR-1829c-3p | -1,03 | 0,789263 |
| MIMAT0020139 | cel-miR-4933     | -1,01 | 0,790122 |
| MIMAT0032817 | cel-miR-8202-5p  | -1,03 | 0,790341 |
| MIMAT0000300 | cel-miR-244-5p   | 1,01  | 0,804297 |
| MIMAT0020318 | cel-miR-72-3p    | 1,01  | 0,812611 |
| MIMAT0000002 | cel-lin-4-5p     | 1,01  | 0,816221 |
| MIMAT0032833 | cel-miR-8208-5p  | 1,01  | 0,820188 |
| MIMAT0020358 | cel-miR-1819-5p  | 1,02  | 0,821894 |
| MIMAT0004230 | cel-miR-795-5p   | 1,01  | 0,823677 |
| MIMAT0015101 | cel-miR-59-5p    | -1,02 | 0,825804 |
| MIMAT0011433 | cel-miR-2209c-5p | 1,01  | 0,831595 |
| MIMAT0032830 | cel-miR-8206-3p  | -1,02 | 0,831749 |
| MIMAT0019993 | cel-miR-4809-5p  | -1,01 | 0,835045 |
| MIMAT0011460 | cel-miR-2219-3p  | 1,01  | 0,848487 |
| MIMAT0020354 | cel-miR-800-5p   | 1,02  | 0,853507 |
| MIMAT0015097 | cel-miR-47-5p    | -1,01 | 0,854602 |
| MIMAT0022190 | cel-miR-5549-3p  | 1,02  | 0,857715 |
| MIMAT0022185 | cel-miR-5547-5p  | 1,01  | 0,85983  |
| MIMAT0032795 | cel-miR-8191-5p  | 1,02  | 0,862721 |
| MIMAT0022192 | cel-miR-5550-3p  | -1,01 | 0,870367 |
| MIMAT0020332 | cel-miR-236-5p   | -1,01 | 0,875199 |
| MIMAT0019992 | cel-miR-4808-3p  | 1,01  | 0,882607 |
| MIMAT0011428 | cel-miR-2208a-3p | 1,01  | 0,883074 |
| MIMAT0020357 | cel-miR-1022-3p  | -1,01 | 0,886165 |
| MIMAT0004235 | cel-miR-800-3p   | 1,01  | 0,893935 |
| MIMAT0032837 | cel-miR-8210-5p  | 1,01  | 0,897985 |
| MIMAT0020003 | cel-miR-4814-3p  | -1,01 | 0,90232  |
| MIMAT0020359 | cel-miR-1820-3p  | -1,01 | 0,91624  |
| MIMAT0011429 | cel-miR-2208b-5p | 1,01  | 0,91642  |
| MIMAT0015100 | cel-miR-58a-5p   | 1,01  | 0,920705 |
| MIMAT0000768 | cel-miR-392-3p   | 1,01  | 0,9222   |
| MIMAT0020341 | cel-miR-255-5p   | 1,01  | 0,930562 |
| MIMAT0004227 | cel-miR-792-3p   | 1,01  | 0,931174 |
| MIMAT0006776 | cel-miR-58b-3p   | 1,01  | 0,93404  |
| MIMAT0032786 | cel-miR-8186-3p  | -1,01 | 0,934163 |
| MIMAT0020777 | cel-miR-232-5p   | 1,01  | 0,938378 |
| MIMAT0032841 | cel-miR-2217b-5p | 1     | 0,940007 |
| MIMAT0032832 | cel-miR-8207-3p  | 1,01  | 0,947606 |
| MIMAT0000017 | cel-miR-46-3p    | 1     | 0,950707 |
| MIMAT0020344 | cel-miR-392-5p   | 1,01  | 0,958096 |

|              |                    |       |          |
|--------------|--------------------|-------|----------|
| MIMAT0011447 | cel-miR-2216-5p    | -1,01 | 0,958461 |
| MIMAT0015240 | cel-miR-788-3p     | -1,01 | 0,959644 |
| MIMAT0005031 | cel-miR-1018       | 1     | 0,960802 |
| MIMAT0020329 | cel-miR-233-5p     | -1,01 | 0,960907 |
| MIMAT0032797 | cel-miR-8192-5p    | 1     | 0,967306 |
| MIMAT0000702 | cel-miR-360-3p     | 1     | 0,973002 |
| MIMAT0020343 | cel-miR-357-5p     | 1     | 0,975186 |
| MIMAT0020351 | cel-miR-792-5p     | 1     | 0,975312 |
| MIMAT0020132 | cel-miR-4925       | 1     | 0,98271  |
| MIMAT0015092 | cel-lin-4-3p       | 1     | 0,986038 |
| MIMAT0006775 | cel-miR-1833       | 1     | 0,987368 |
| MIMAT0032035 | cel-miR-1823-5p    | 1     | 0,989283 |
| MIMAT0011434 | cel-miR-2209c-3p   | 1     | 0,990671 |
| MIMAT0032838 | cel-miR-8210-3p    | 1     | 0,991899 |
| MIMAT0004215 | cel-miR-253-3p     | 1     | 0,991923 |
| MIMAT0020314 | cel-miR-57-3p      | 1     | 0,992195 |
| MIMAT0011449 | cel-miR-1832b-5p   | 1     | 0,993358 |
| MIMAT0020338 | cel-miR-249-5p     | 1     | 0,993751 |
| MIMAT0019995 | cel-miR-4810a      | 1     | 0,999922 |
| MIMAT0005032 | cel-miR-1019-3p    | 1     | 1        |
| MIMAT0005522 | cel-miR-1021       | 1     | 1        |
| MIMAT0006585 | cel-miR-1818       | 1     | 1        |
| MIMAT0011426 | cel-miR-2207-3p    | 1     | 1        |
| MIMAT0011453 | cel-miR-2209b-5p   | 1     | 1        |
| MIMAT0011437 | cel-miR-2211-5p    | 1     | 1        |
| MIMAT0011445 | cel-miR-2215-5p    | 1     | 1        |
| MIMAT0032839 | cel-miR-2217b-1-5p | 1     | 1        |
| MIMAT0011455 | cel-miR-2218a-5p   | 1     | 1        |
| MIMAT0011457 | cel-miR-2218b-5p   | 1     | 1        |
| MIMAT0011458 | cel-miR-2218b-3p   | 1     | 1        |
| MIMAT0000311 | cel-miR-256        | 1     | 1        |
| MIMAT0000316 | cel-miR-261        | 1     | 1        |
| MIMAT0000320 | cel-miR-264        | 1     | 1        |
| MIMAT0000321 | cel-miR-265        | 1     | 1        |
| MIMAT0000323 | cel-miR-267        | 1     | 1        |
| MIMAT0000324 | cel-miR-268        | 1     | 1        |
| MIMAT0000326 | cel-miR-270        | 1     | 1        |
| MIMAT0000327 | cel-miR-271        | 1     | 1        |
| MIMAT0000328 | cel-miR-272        | 1     | 1        |
| MIMAT0000329 | cel-miR-273        | 1     | 1        |
| MIMAT0031894 | cel-miR-354-5p     | 1     | 1        |
| MIMAT0031895 | cel-miR-355-3p     | 1     | 1        |
| MIMAT0000698 | cel-miR-356a       | 1     | 1        |
| MIMAT0020134 | cel-miR-4927       | 1     | 1        |
| MIMAT0020136 | cel-miR-4930       | 1     | 1        |
| MIMAT0020137 | cel-miR-4931       | 1     | 1        |

|              |                  |   |   |
|--------------|------------------|---|---|
| MIMAT0020141 | cel-miR-4935     | 1 | 1 |
| MIMAT0022187 | cel-miR-5548-5p  | 1 | 1 |
| MIMAT0022188 | cel-miR-5548-3p  | 1 | 1 |
| MIMAT0022189 | cel-miR-5549-5p  | 1 | 1 |
| MIMAT0022308 | cel-miR-5593-3p  | 1 | 1 |
| MIMAT0020321 | cel-miR-76-5p    | 1 | 1 |
| MIMAT0032015 | cel-miR-785-5p   | 1 | 1 |
| MIMAT0032787 | cel-miR-8187-5p  | 1 | 1 |
| MIMAT0032790 | cel-miR-8188-3p  | 1 | 1 |
| MIMAT0032800 | cel-miR-8193-3p  | 1 | 1 |
| MIMAT0032802 | cel-miR-8194-3p  | 1 | 1 |
| MIMAT0032805 | cel-miR-8196a-5p | 1 | 1 |
| MIMAT0032825 | cel-miR-8196b-5p | 1 | 1 |
| MIMAT0032807 | cel-miR-8197-5p  | 1 | 1 |
| MIMAT0032813 | cel-miR-8200-5p  | 1 | 1 |
| MIMAT0032814 | cel-miR-8200-3p  | 1 | 1 |
| MIMAT0032824 | cel-miR-8204-3p  | 1 | 1 |
| MIMAT0032828 | cel-miR-8205-3p  | 1 | 1 |
| MIMAT0032831 | cel-miR-8207-5p  | 1 | 1 |
| MIMAT0032835 | cel-miR-8209-5p  | 1 | 1 |
| MIMAT0032844 | cel-miR-8212-5p  | 1 | 1 |
