# Supplementary material
Source: publisher figshare collection journal article supplement (https://gsajournals.figshare.com/articles/dataset/_/8852180)
Supplement: Supplementary file 11 [file 1]

| miRBaseID    | MatureSymbol     | FoldChange alg-2 NT/N2 NT | pValue |
|--------------|------------------|---------------------------|--------|
| MIMAT0000006 | cel-miR-35-3p    | -4,66                     | 0      |
| MIMAT0000007 | cel-miR-36-3p    | -7,31                     | 0      |
| MIMAT0000008 | cel-miR-37-3p    | -4,56                     | 0      |
| MIMAT0000011 | cel-miR-40-3p    | -7,84                     | 0      |
| MIMAT0000022 | cel-miR-51-5p    | -5,94                     | 0      |
| MIMAT0000033 | cel-miR-61-3p    | -3,01                     | 0      |
| MIMAT0006770 | cel-miR-1829b-5p | -3,39                     | 0      |
| MIMAT0000010 | cel-miR-39-3p    | -3,61                     | 0      |
| MIMAT0000028 | cel-miR-56-3p    | -3,03                     | 0      |
| MIMAT0020320 | cel-miR-74-5p    | 2,89                      | 0      |
| MIMAT0000302 | cel-miR-246-3p   | -2,23                     | 0      |
| MIMAT0000020 | cel-miR-49-3p    | -4,47                     | 0      |
| MIMAT0000285 | cel-miR-230-3p   | -4,03                     | 0      |
| MIMAT0020774 | cel-miR-77-5p    | 2,19                      | 0      |
| MIMAT0015103 | cel-miR-61-5p    | -3,41                     | 0      |
| MIMAT0004225 | cel-miR-790-5p   | -8                        | 0      |
| MIMAT0000026 | cel-miR-55-3p    | -1,84                     | 0      |
| MIMAT0020771 | cel-miR-44-5p    | 2,13                      | 0      |
| MIMAT0020772 | cel-miR-45-5p    | 1,95                      | 0      |
| MIMAT0011429 | cel-miR-2208b-5p | -6,59                     | 0      |
| MIMAT0000056 | cel-miR-83-3p    | -2,13                     | 0      |
| MIMAT0011439 | cel-miR-2212-5p  | -2,25                     | 0      |
| MIMAT0000031 | cel-miR-59-3p    | 1,51                      | 0      |
| MIMAT0015116 | cel-miR-240-5p   | 1,54                      | 0      |
| MIMAT0032016 | cel-miR-789-5p   | -1,85                     | 0      |
| MIMAT0015100 | cel-miR-58a-5p   | 1,72                      | 0      |
| MIMAT0015107 | cel-miR-71-3p    | 1,67                      | 0      |
| MIMAT0020337 | cel-miR-246-5p   | 2,14                      | 0      |
| MIMAT0015113 | cel-miR-230-5p   | -1,56                     | 0      |
| MIMAT0011427 | cel-miR-2208a-5p | -14,22                    | 0      |
| MIMAT0020318 | cel-miR-72-3p    | 1,8                       | 0      |
| MIMAT0011432 | cel-miR-2209a-3p | -4,44                     | 0      |
| MIMAT0000027 | cel-miR-56-5p    | 1,51                      | 0      |
| MIMAT0000306 | cel-miR-250-3p   | -1,36                     | 0      |
| MIMAT0015095 | cel-miR-42-5p    | 2,45                      | 0      |
| MIMAT0006771 | cel-miR-1829c-5p | -1,48                     | 0      |
| MIMAT0000294 | cel-miR-239a-5p  | 1,37                      | 0      |
| MIMAT0000289 | cel-miR-234-3p   | -2,28                     | 0      |
| MIMAT0000297 | cel-miR-241-5p   | -1,47                     | 0      |
| MIMAT0020308 | cel-miR-43-5p    | 2,83                      | 0      |
| MIMAT0020325 | cel-miR-87-5p    | 1,85                      | 0      |
| MIMAT0020313 | cel-miR-55-5p    | 1,91                      | 0      |
| MIMAT0000023 | cel-miR-52-5p    | -1,33                     | 0      |
| MIMAT0000290 | cel-miR-235-3p   | 1,39                      | 0      |
| MIMAT0004221 | cel-miR-786-3p   | -1,66                     | 0      |

|              |                  |              |          |
|--------------|------------------|--------------|----------|
| MIMAT0020323 | cel-miR-82-5p    | <b>2,14</b>  | <b>0</b> |
| MIMAT0000012 | cel-miR-41-3p    | <b>-2,83</b> | <b>0</b> |
| MIMAT0022306 | cel-miR-5592-3p  | 1,39         | 0        |
| MIMAT0004215 | cel-miR-253-3p   | -1,38        | 0        |
| MIMAT0005031 | cel-miR-1018     | -1,88        | 0        |
| MIMAT0000001 | cel-let-7-5p     | 1,38         | 0        |
| MIMAT0000036 | cel-miR-64-5p    | -1,3         | 0        |
| MIMAT0015110 | cel-miR-84-3p    | 1,42         | 0        |
| MIMAT0000292 | cel-miR-237-5p   | 1,22         | 0        |
| MIMAT0015094 | cel-miR-37-5p    | 1,32         | 0        |
| MIMAT0032017 | cel-miR-789-2-5p | -1,43        | 0        |
| MIMAT0000044 | cel-miR-72-5p    | -1,22        | 0        |
| MIMAT0000058 | cel-miR-85-3p    | 1,23         | 0        |
| MIMAT0000038 | cel-miR-66-5p    | -1,39        | 0        |
| MIMAT0015109 | cel-miR-81-5p    | 1,82         | 0        |
| MIMAT0020301 | cel-miR-1-5p     | 1,53         | 0        |
| MIMAT0020770 | cel-miR-41-5p    | 1,48         | 0        |
| MIMAT0015099 | cel-miR-51-3p    | 1,47         | 0        |
| MIMAT0000037 | cel-miR-65-5p    | -1,24        | 0        |
| MIMAT0020006 | cel-miR-4816-3p  | -1,95        | 0        |
| MIMAT0000284 | cel-miR-229-5p   | -1,3         | 0        |
| MIMAT0015120 | cel-miR-358-5p   | <b>-2,95</b> | <b>0</b> |
| MIMAT0020303 | cel-miR-35-5p    | 1,59         | 0        |
| MIMAT0019998 | cel-miR-4812-5p  | <b>-3,14</b> | <b>0</b> |
| MIMAT0022305 | cel-miR-5592-5p  | 1,25         | 0        |
| MIMAT0020776 | cel-miR-86-3p    | 1,34         | 0        |
| MIMAT0004224 | cel-miR-789-3p   | <b>-3,01</b> | <b>0</b> |
| MIMAT0020305 | cel-miR-38-5p    | <b>2,23</b>  | <b>0</b> |
| MIMAT0005033 | cel-miR-1020-3p  | -1,57        | 0        |
| MIMAT0020000 | cel-miR-4813-5p  | 1,65         | 0        |
| MIMAT0015105 | cel-miR-64-3p    | 1,45         | 0        |
| MIMAT0000768 | cel-miR-392-3p   | -1,65        | 0        |
| MIMAT0020334 | cel-miR-239a-3p  | 1,4          | 0        |
| MIMAT0020349 | cel-miR-790-3p   | 1,51         | 0        |
| MIMAT0000046 | cel-miR-74-3p    | -1,32        | 0        |
| MIMAT0011434 | cel-miR-2209c-3p | <b>-7,94</b> | <b>0</b> |
| MIMAT0015114 | cel-miR-238-5p   | 1,35         | 0        |
| MIMAT0000053 | cel-miR-80-3p    | -1,19        | 0        |
| MIMAT0000300 | cel-miR-244-5p   | -1,16        | 0        |
| MIMAT0000009 | cel-miR-38-3p    | -1,27        | 0        |
| MIMAT0000305 | cel-miR-249-3p   | 1,26         | 0        |
| MIMAT0020304 | cel-miR-36-5p    | 1,3          | 0,000001 |
| MIMAT0020302 | cel-miR-2-5p     | 1,73         | 0,000001 |
| MIMAT0006584 | cel-miR-1817     | 1,39         | 0,000001 |
| MIMAT0000019 | cel-miR-48-5p    | 1,13         | 0,000001 |
| MIMAT0015098 | cel-miR-48-3p    | 1,27         | 0,000002 |

|              |                  |              |                 |
|--------------|------------------|--------------|-----------------|
| MIMAT0004219 | cel-miR-784-5p   | <b>-2,53</b> | <b>0,000002</b> |
| MIMAT0000699 | cel-miR-357-3p   | -1,37        | 0,000004        |
| MIMAT0000061 | cel-miR-90-3p    | 1,16         | 0,000004        |
| MIMAT0000283 | cel-miR-228-5p   | -1,22        | 0,000005        |
| MIMAT0032811 | cel-miR-8199-5p  | 1,67         | 0,000006        |
| MIMAT0020773 | cel-miR-54-5p    | 1,16         | 0,000006        |
| MIMAT0000013 | cel-miR-42-3p    | -1,6         | 0,000019        |
| MIMAT0006769 | cel-miR-1829a-3p | <b>-3,32</b> | <b>0,000022</b> |
| MIMAT0020322 | cel-miR-79-5p    | 1,49         | 0,000025        |
| MIMAT0000291 | cel-miR-236-3p   | -1,11        | 0,000027        |
| MIMAT0020319 | cel-miR-73-5p    | <b>2,13</b>  | <b>0,000027</b> |
| MIMAT0020316 | cel-miR-67-5p    | 1,93         | 0,000028        |
| MIMAT0004226 | cel-miR-791-3p   | <b>-2,39</b> | <b>0,000031</b> |
| MIMAT0020005 | cel-miR-4816-5p  | -1,59        | 0,000037        |
| MIMAT0020339 | cel-miR-250-5p   | 1,28         | 0,000041        |
| MIMAT0000002 | cel-lin-4-5p     | 1,21         | 0,000041        |
| MIMAT0015092 | cel-lin-4-3p     | 1,61         | 0,000049        |
| MIMAT0011430 | cel-miR-2208b-3p | <b>-3,61</b> | <b>0,000071</b> |
| MIMAT0000700 | cel-miR-358-3p   | -1,33        | 0,000088        |
| MIMAT0020335 | cel-miR-241-3p   | -1,35        | 0,000094        |
| MIMAT0004222 | cel-miR-787-3p   | -1,3         | 0,000096        |
| MIMAT0015112 | cel-miR-229-3p   | 1,13         | 0,000126        |
| MIMAT0020775 | cel-miR-83-5p    | 1,64         | 0,000148        |
| MIMAT0000003 | cel-miR-1-3p     | 1,19         | 0,000165        |
| MIMAT0004230 | cel-miR-795-5p   | -1,21        | 0,000177        |
| MIMAT0000045 | cel-miR-73-3p    | -1,13        | 0,000195        |
| MIMAT0000308 | cel-miR-252-5p   | 1,2          | 0,000239        |
| MIMAT0000050 | cel-miR-78       | 1,24         | 0,000277        |
| MIMAT0000029 | cel-miR-57-5p    | 1,1          | 0,000301        |
| MIMAT0006589 | cel-miR-1822-3p  | -1,38        | 0,000302        |
| MIMAT0000004 | cel-miR-2-3p     | -1,13        | 0,000303        |
| MIMAT0032806 | cel-miR-8196a-3p | -1,49        | 0,000316        |
| MIMAT0000034 | cel-miR-62       | -1,21        | 0,000567        |
| MIMAT0020778 | cel-miR-1830-3p  | 1,21         | 0,000613        |
| MIMAT0015108 | cel-miR-75-5p    | -1,43        | 0,000831        |
| MIMAT0000030 | cel-miR-58a-3p   | 1,09         | 0,0011          |
| MIMAT0000024 | cel-miR-53-5p    | -1,15        | 0,001306        |
| MIMAT0020353 | cel-miR-795-3p   | -1,41        | 0,001528        |
| MIMAT0000299 | cel-miR-243-3p   | -1,13        | 0,002041        |
| MIMAT0011454 | cel-miR-2209b-3p | <b>-4,44</b> | <b>0,002077</b> |
| MIMAT0020310 | cel-miR-50-3p    | 1,39         | 0,002079        |
| MIMAT0022312 | cel-miR-356b-3p  | 1,24         | 0,002184        |
| MIMAT0019994 | cel-miR-4809-3p  | <b>-3,2</b>  | <b>0,002388</b> |
| MIMAT0000057 | cel-miR-84-5p    | 1,09         | 0,003428        |
| MIMAT0000015 | cel-miR-44-3p    | 1,08         | 0,004666        |
| MIMAT0000016 | cel-miR-45-3p    | 1,08         | 0,004666        |

|              |                  |              |                 |
|--------------|------------------|--------------|-----------------|
| MIMAT0032038 | cel-miR-1829c-3p | -1,99        | 0,004892        |
| MIMAT0020311 | cel-miR-52-3p    | 1,19         | 0,004937        |
| MIMAT0000042 | cel-miR-70-3p    | 1,09         | 0,004977        |
| MIMAT0020135 | cel-miR-4929     | -1,72        | 0,005483        |
| MIMAT0032826 | cel-miR-8196b-3p | <b>-2,89</b> | <b>0,005875</b> |
| MIMAT0011462 | cel-miR-2220-3p  | <b>-2,93</b> | <b>0,006375</b> |
| MIMAT0020777 | cel-miR-232-5p   | 1,49         | 0,00666         |
| MIMAT0006588 | cel-miR-1821-3p  | -1,32        | 0,00674         |
| MIMAT0019995 | cel-miR-4810a    | <b>-2,35</b> | <b>0,006767</b> |
| MIMAT0032810 | cel-miR-8198-3p  | 1,38         | 0,007484        |
| MIMAT0015240 | cel-miR-788-3p   | 1,38         | 0,008194        |
| MIMAT0032037 | cel-miR-1829b-3p | -1,91        | 0,008669        |
| MIMAT0000032 | cel-miR-60-3p    | 1,09         | 0,010888        |
| MIMAT0019987 | cel-miR-4805-3p  | <b>-2,62</b> | <b>0,011016</b> |
| MIMAT0020358 | cel-miR-1819-5p  | <b>-2,93</b> | <b>0,013597</b> |
| MIMAT0020352 | cel-miR-794-3p   | <b>-2,08</b> | <b>0,013675</b> |
| MIMAT0015096 | cel-miR-46-5p    | 1,09         | 0,015819        |
| MIMAT0020350 | cel-miR-791-5p   | 1,28         | 0,016123        |
| MIMAT0020327 | cel-miR-228-3p   | 1,24         | 0,017805        |
| MIMAT0020342 | cel-miR-259-3p   | 1,14         | 0,018003        |
| MIMAT0000017 | cel-miR-46-3p    | 1,09         | 0,018385        |
| MIMAT0011428 | cel-miR-2208a-3p | <b>-3,29</b> | <b>0,019497</b> |
| MIMAT0032840 | cel-miR-2217b-3p | -1,89        | 0,021821        |
| MIMAT0004227 | cel-miR-792-3p   | -1,72        | 0,026445        |
| MIMAT0000047 | cel-miR-75-3p    | -1,13        | 0,030471        |
| MIMAT0000055 | cel-miR-82-3p    | 1,06         | 0,030859        |
| MIMAT0032827 | cel-miR-8205-5p  | <b>-3,25</b> | <b>0,030951</b> |
| MIMAT0000295 | cel-miR-239b-5p  | 1,08         | 0,032191        |
| MIMAT0022182 | cel-miR-5545-3p  | <b>-2,31</b> | <b>0,037449</b> |
| MIMAT0020142 | cel-miR-4936     | 1,43         | 0,039588        |
| MIMAT0000309 | cel-miR-253-5p   | 1,54         | 0,042833        |
| MIMAT0020315 | cel-miR-66-3p    | 1,21         | 0,045327        |
| MIMAT0020347 | cel-miR-784-3p   | -1,31        | 0,045611        |
| MIMAT0020344 | cel-miR-392-5p   | -1,87        | 0,045792        |
| MIMAT0020329 | cel-miR-233-5p   | 1,77         | 0,050195        |
| MIMAT0014446 | cel-miR-2953-5p  | <b>-2,03</b> | <b>0,057479</b> |
| MIMAT0000314 | cel-miR-259-5p   | 1,13         | 0,057791        |
| MIMAT0015267 | cel-miR-1829a-5p | -1,21        | 0,063024        |
| MIMAT0020312 | cel-miR-53-3p    | 1,27         | 0,066758        |
| MIMAT0020361 | cel-miR-58b-5p   | <b>-2,35</b> | <b>0,067257</b> |
| MIMAT0022184 | cel-miR-5546-3p  | -1,74        | 0,068502        |
| MIMAT0000048 | cel-miR-76-3p    | 1,09         | 0,070049        |
| MIMAT0000005 | cel-miR-34-5p    | 1,08         | 0,07798         |
| MIMAT0015093 | cel-miR-34-3p    | 1,06         | 0,082864        |
| MIMAT0020326 | cel-miR-90-5p    | 1,15         | 0,085387        |
| MIMAT0000049 | cel-miR-77-3p    | 1,06         | 0,090348        |

|              |                  |              |                 |
|--------------|------------------|--------------|-----------------|
| MIMAT0020132 | cel-miR-4925     | <b>-2,41</b> | <b>0,091481</b> |
| MIMAT0004232 | cel-miR-797-5p   | 1,64         | 0,093788        |
| MIMAT0020306 | cel-miR-39-5p    | 1,07         | 0,099426        |
| MIMAT0020001 | cel-miR-4813-3p  | 1,11         | 0,1027          |
| MIMAT0032804 | cel-miR-8195-3p  | 1,99         | 0,117459        |
| MIMAT0004233 | cel-miR-798      | 1,15         | 0,119277        |
| MIMAT0032803 | cel-miR-8195-5p  | <b>2,28</b>  | <b>0,122818</b> |
| MIMAT0015101 | cel-miR-59-5p    | 1,82         | 0,125818        |
| MIMAT0022193 | cel-miR-5551-5p  | -1,16        | 0,130339        |
| MIMAT0015118 | cel-miR-244-3p   | 1,27         | 0,130357        |
| MIMAT0015241 | cel-miR-797-3p   | -1,23        | 0,132455        |
| MIMAT0004223 | cel-miR-788-5p   | 1,1          | 0,133494        |
| MIMAT0000287 | cel-miR-232-3p   | 1,08         | 0,134408        |
| MIMAT0015102 | cel-miR-60-5p    | 1,15         | 0,138602        |
| MIMAT0020359 | cel-miR-1820-3p  | -1,93        | 0,139878        |
| MIMAT0005523 | cel-miR-1022-5p  | -1,07        | 0,141711        |
| MIMAT0020143 | cel-miR-4937     | 1,19         | 0,14681         |
| MIMAT0000701 | cel-miR-359      | 1,07         | 0,153604        |
| MIMAT0020130 | cel-miR-4924     | -2           | 0,162257        |
| MIMAT0000303 | cel-miR-247-3p   | 1,39         | 0,166608        |
| MIMAT0011451 | cel-miR-2217a-5p | -1,82        | 0,170028        |
| MIMAT0032791 | cel-miR-8189-5p  | -1,95        | 0,173943        |
| MIMAT0032816 | cel-miR-8201-3p  | -1,96        | 0,187017        |
| MIMAT0032842 | cel-miR-8211-5p  | 1,82         | 0,197492        |
| MIMAT0015097 | cel-miR-47-5p    | 1,06         | 0,200208        |
| MIMAT0020328 | cel-miR-231-5p   | 1,21         | 0,203399        |
| MIMAT0022307 | cel-miR-5593-5p  | -1,99        | 0,211978        |
| MIMAT0022311 | cel-miR-356b-5p  | 1,74         | 0,216865        |
| MIMAT0011436 | cel-miR-2210-3p  | -1,16        | 0,219666        |
| MIMAT0020317 | cel-miR-70-5p    | -1,13        | 0,223735        |
| MIMAT0000286 | cel-miR-231-3p   | -1,09        | 0,224253        |
| MIMAT0020338 | cel-miR-249-5p   | 1,92         | 0,229161        |
| MIMAT0031895 | cel-miR-355-3p   | 1,72         | 0,231386        |
| MIMAT0000025 | cel-miR-54-3p    | -1,2         | 0,231806        |
| MIMAT0032035 | cel-miR-1823-5p  | 1,85         | 0,241678        |
| MIMAT0000325 | cel-miR-269      | -1,72        | 0,242847        |
| MIMAT0019991 | cel-miR-4808-5p  | 1,82         | 0,248335        |
| MIMAT0004220 | cel-miR-785-3p   | -1,04        | 0,266047        |
| MIMAT0032837 | cel-miR-8210-5p  | 1,33         | 0,268351        |
| MIMAT0000059 | cel-miR-86-5p    | -1,04        | 0,271467        |
| MIMAT0032830 | cel-miR-8206-3p  | -1,27        | 0,277147        |
| MIMAT0019993 | cel-miR-4809-5p  | -1,6         | 0,28477         |
| MIMAT0032039 | cel-miR-1832a-5p | -1,16        | 0,28535         |
| MIMAT0019990 | cel-miR-4807     | -1,62        | 0,294264        |
| MIMAT0011438 | cel-miR-2211-3p  | -1,78        | 0,294357        |
| MIMAT0015117 | cel-miR-243-5p   | 1,04         | 0,294665        |

|              |                  |       |          |
|--------------|------------------|-------|----------|
| MIMAT0011433 | cel-miR-2209c-5p | -1,58 | 0,299299 |
| MIMAT0032843 | cel-miR-8211-3p  | -1,74 | 0,302019 |
| MIMAT0031896 | cel-lsy-6-5p     | 1,54  | 0,304465 |
| MIMAT0015111 | cel-miR-124-5p   | -1,57 | 0,308698 |
| MIMAT0032821 | cel-miR-4810b-5p | -1,56 | 0,310486 |
| MIMAT0032793 | cel-miR-8190-5p  | 1,65  | 0,329609 |
| MIMAT0006587 | cel-miR-1820-5p  | 1,04  | 0,336916 |
| MIMAT0031891 | cel-miR-254-5p   | -1,67 | 0,337134 |
| MIMAT0011460 | cel-miR-2219-3p  | 1,68  | 0,340581 |
| MIMAT0019988 | cel-miR-4806-5p  | 1,35  | 0,344809 |
| MIMAT0011448 | cel-miR-2216-3p  | -1,68 | 0,345249 |
| MIMAT0032786 | cel-miR-8186-3p  | -1,64 | 0,345673 |
| MIMAT0020307 | cel-miR-40-5p    | 1,16  | 0,351861 |
| MIMAT0019997 | cel-miR-4811-3p  | 1,13  | 0,353473 |
| MIMAT0020138 | cel-miR-4932     | 1,59  | 0,354964 |
| MIMAT0004234 | cel-miR-799      | 1,11  | 0,360459 |
| MIMAT0006768 | cel-miR-1828     | -1,24 | 0,360543 |
| MIMAT0022191 | cel-miR-5550-5p  | -1,42 | 0,399354 |
| MIMAT0032795 | cel-miR-8191-5p  | 1,26  | 0,409666 |
| MIMAT0020309 | cel-miR-49-5p    | -1,06 | 0,415257 |
| MIMAT0032794 | cel-miR-8190-3p  | 1,47  | 0,417295 |
| MIMAT0000054 | cel-miR-81-3p    | 1,02  | 0,422543 |
| MIMAT0015104 | cel-miR-63-5p    | -1,04 | 0,426962 |
| MIMAT0020314 | cel-miR-57-3p    | 1,25  | 0,427481 |
| MIMAT0014447 | cel-miR-2953-3p  | -1,37 | 0,430876 |
| MIMAT0032809 | cel-miR-8198-5p  | 1,33  | 0,434752 |
| MIMAT0011450 | cel-miR-1832b-3p | -1,34 | 0,435882 |
| MIMAT0020341 | cel-miR-255-5p   | 1,33  | 0,436674 |
| MIMAT0015091 | cel-let-7-3p     | -1,18 | 0,437162 |
| MIMAT0032802 | cel-miR-8194-3p  | 1,32  | 0,438857 |
| MIMAT0032834 | cel-miR-8208-3p  | -1,32 | 0,444431 |
| MIMAT0020139 | cel-miR-4933     | -1,33 | 0,445357 |
| MIMAT0032785 | cel-miR-8186-5p  | 1,46  | 0,446005 |
| MIMAT0000749 | cel-lsy-6-3p     | -1,05 | 0,450382 |
| MIMAT0000696 | cel-miR-354-3p   | -1,3  | 0,464754 |
| MIMAT0000282 | cel-miR-124-3p   | 1,06  | 0,468106 |
| MIMAT0020332 | cel-miR-236-5p   | 1,13  | 0,471094 |
| MIMAT0032792 | cel-miR-8189-3p  | 1,27  | 0,477103 |
| MIMAT0015115 | cel-miR-239b-3p  | 1,27  | 0,484045 |
| MIMAT0031894 | cel-miR-354-5p   | 1,27  | 0,484045 |
| MIMAT0032015 | cel-miR-785-5p   | 1,27  | 0,484045 |
| MIMAT0032818 | cel-miR-8202-3p  | 1,27  | 0,484045 |
| MIMAT0011441 | cel-miR-2213-5p  | -1,28 | 0,484106 |
| MIMAT0020129 | cel-miR-4923a    | -1,28 | 0,484106 |
| MIMAT0022313 | cel-miR-5595-5p  | -1,28 | 0,484106 |
| MIMAT0020351 | cel-miR-792-5p   | -1,28 | 0,484106 |

|              |                  |       |          |
|--------------|------------------|-------|----------|
| MIMAT0032835 | cel-miR-8209-5p  | 1,27  | 0,484309 |
| MIMAT0011440 | cel-miR-2212-3p  | -1,27 | 0,486879 |
| MIMAT0020360 | cel-miR-1824-3p  | -1,41 | 0,487595 |
| MIMAT0022314 | cel-miR-5595-3p  | -1,27 | 0,491786 |
| MIMAT0032823 | cel-miR-8204-5p  | -1,27 | 0,491786 |
| MIMAT0011446 | cel-miR-2215-3p  | -1,27 | 0,496985 |
| MIMAT0020133 | cel-miR-4926     | -1,27 | 0,496985 |
| MIMAT0032812 | cel-miR-8199-3p  | -1,39 | 0,504871 |
| MIMAT0000039 | cel-miR-67-3p    | -1,05 | 0,509685 |
| MIMAT0022197 | cel-miR-5553-5p  | -1,42 | 0,516847 |
| MIMAT0032845 | cel-miR-8212-3p  | 1,15  | 0,532779 |
| MIMAT0011431 | cel-miR-2209a-5p | -1,4  | 0,539124 |
| MIMAT0022198 | cel-miR-5553-3p  | 1,39  | 0,544437 |
| MIMAT0020003 | cel-miR-4814-3p  | 1,32  | 0,54854  |
| MIMAT0032801 | cel-miR-8194-5p  | -1,21 | 0,550018 |
| MIMAT0020348 | cel-miR-787-5p   | -1,21 | 0,552883 |
| MIMAT0032798 | cel-miR-8192-3p  | -1,21 | 0,552883 |
| MIMAT0020343 | cel-miR-357-5p   | 1,3   | 0,557095 |
| MIMAT0015121 | cel-miR-360-5p   | 1,17  | 0,558744 |
| MIMAT0000322 | cel-miR-266      | 1,18  | 0,561571 |
| MIMAT0032841 | cel-miR-2217b-5p | -1,2  | 0,563169 |
| MIMAT0032788 | cel-miR-8187-3p  | -1,2  | 0,563169 |
| MIMAT0032789 | cel-miR-8188-5p  | -1,2  | 0,563169 |
| MIMAT0000043 | cel-miR-71-5p    | 1,02  | 0,563808 |
| MIMAT0004231 | cel-miR-796      | 1,36  | 0,564982 |
| MIMAT0011447 | cel-miR-2216-5p  | -1,07 | 0,570603 |
| MIMAT0032829 | cel-miR-8206-5p  | 1,33  | 0,573386 |
| MIMAT0004235 | cel-miR-800-3p   | -1,06 | 0,576993 |
| MIMAT0000310 | cel-miR-254-3p   | -1,13 | 0,58045  |
| MIMAT0004228 | cel-miR-793      | -1,06 | 0,585449 |
| MIMAT0000293 | cel-miR-238-3p   | 1,01  | 0,587477 |
| MIMAT0020356 | cel-miR-1020-5p  | 1,3   | 0,590203 |
| MIMAT0000021 | cel-miR-50-5p    | 1,01  | 0,593879 |
| MIMAT0000051 | cel-miR-79-3p    | -1,02 | 0,595706 |
| MIMAT0000301 | cel-miR-245-3p   | 1,01  | 0,598184 |
| MIMAT0020128 | cel-miR-4922     | -1,23 | 0,613217 |
| MIMAT0022190 | cel-miR-5549-3p  | -1,15 | 0,61524  |
| MIMAT0022181 | cel-miR-5545-5p  | 1,13  | 0,62127  |
| MIMAT0020004 | cel-miR-4815     | -1,26 | 0,625281 |
| MIMAT0011459 | cel-miR-2219-5p  | 1,14  | 0,632868 |
| MIMAT0015266 | cel-miR-1822-5p  | 1,16  | 0,652585 |
| MIMAT0015119 | cel-miR-247-5p   | -1,27 | 0,654384 |
| MIMAT0019992 | cel-miR-4808-3p  | -1,27 | 0,655739 |
| MIMAT0015239 | cel-miR-786-5p   | 1,06  | 0,658505 |
| MIMAT0000298 | cel-miR-242      | 1,01  | 0,661611 |
| MIMAT0006776 | cel-miR-58b-3p   | 1,23  | 0,671551 |

|              |                  |       |          |
|--------------|------------------|-------|----------|
| MIMAT0004216 | cel-miR-255-3p   | 1,08  | 0,674732 |
| MIMAT0000018 | cel-miR-47-3p    | -1,02 | 0,675267 |
| MIMAT0006591 | cel-miR-1824-5p  | -1,07 | 0,679348 |
| MIMAT0020333 | cel-miR-237-3p   | 1,04  | 0,679441 |
| MIMAT0032817 | cel-miR-8202-5p  | 1,11  | 0,696148 |
| MIMAT0000014 | cel-miR-43-3p    | -1,04 | 0,696224 |
| MIMAT0011452 | cel-miR-2217a-3p | -1,13 | 0,696352 |
| MIMAT0032836 | cel-miR-8209-3p  | 1,17  | 0,69967  |
| MIMAT0020131 | cel-miR-4923b    | -1,22 | 0,699819 |
| MIMAT0019986 | cel-miR-4805-5p  | 1,21  | 0,704342 |
| MIMAT0032796 | cel-miR-8191-3p  | -1,18 | 0,706694 |
| MIMAT0032838 | cel-miR-8210-3p  | -1,16 | 0,722312 |
| MIMAT0020340 | cel-miR-252-3p   | -1,17 | 0,723805 |
| MIMAT0019989 | cel-miR-4806-3p  | -1,17 | 0,724099 |
| MIMAT0011425 | cel-miR-2207-5p  | -1,19 | 0,726143 |
| MIMAT0020002 | cel-miR-4814-5p  | -1,14 | 0,726476 |
| MIMAT0000296 | cel-miR-240-3p   | -1,02 | 0,728658 |
| MIMAT0022194 | cel-miR-5551-3p  | -1,16 | 0,734079 |
| MIMAT0011442 | cel-miR-2213-3p  | -1,16 | 0,734419 |
| MIMAT0032833 | cel-miR-8208-5p  | -1,16 | 0,736862 |
| MIMAT0022185 | cel-miR-5547-5p  | 1,18  | 0,746328 |
| MIMAT0022183 | cel-miR-5546-5p  | -1,15 | 0,750777 |
| MIMAT0006772 | cel-miR-1830-5p  | -1,03 | 0,753877 |
| MIMAT0022195 | cel-miR-5552-5p  | 1,1   | 0,755215 |
| MIMAT0022196 | cel-miR-5552-3p  | 1,16  | 0,757844 |
| MIMAT0000052 | cel-miR-80-5p    | 1,01  | 0,75794  |
| MIMAT0020354 | cel-miR-800-5p   | 1,05  | 0,768358 |
| MIMAT0000697 | cel-miR-355-5p   | 1,01  | 0,77667  |
| MIMAT0011463 | cel-miR-2221     | 1,15  | 0,784822 |
| MIMAT0020126 | cel-miR-4920     | 1,11  | 0,790735 |
| MIMAT0032034 | cel-miR-1821-5p  | -1,15 | 0,795815 |
| MIMAT0000035 | cel-miR-63-3p    | 1,01  | 0,797125 |
| MIMAT0020324 | cel-miR-85-5p    | 1,14  | 0,798098 |
| MIMAT0011449 | cel-miR-1832b-5p | 1,14  | 0,8055   |
| MIMAT0032822 | cel-miR-4810b-3p | 1,14  | 0,807093 |
| MIMAT0032797 | cel-miR-8192-5p  | -1,14 | 0,807633 |
| MIMAT0000702 | cel-miR-360-3p   | 1,13  | 0,82276  |
| MIMAT0032815 | cel-miR-8201-5p  | -1,04 | 0,837447 |
| MIMAT0020331 | cel-miR-235-5p   | -1,07 | 0,840674 |
| MIMAT0011461 | cel-miR-2220-5p  | 1,09  | 0,842789 |
| MIMAT0032819 | cel-miR-8203-5p  | 1,1   | 0,844092 |
| MIMAT0032832 | cel-miR-8207-3p  | -1,1  | 0,856832 |
| MIMAT0004229 | cel-miR-794-5p   | 1,01  | 0,857836 |
| MIMAT0020357 | cel-miR-1022-3p  | 1,09  | 0,870846 |
| MIMAT0011435 | cel-miR-2210-5p  | -1,07 | 0,872579 |
| MIMAT0032820 | cel-miR-8203-3p  | -1,06 | 0,886961 |



|              |                    |       |          |
|--------------|--------------------|-------|----------|
| MIMAT0000288 | cel-miR-233-3p     | 1,01  | 0,893148 |
| MIMAT0000060 | cel-miR-87-3p      | -1,01 | 0,907492 |
| MIMAT0000304 | cel-miR-248        | 1,01  | 0,908158 |
| MIMAT0006775 | cel-miR-1833       | 1,04  | 0,914094 |
| MIMAT0020330 | cel-miR-234-5p     | -1,06 | 0,918088 |
| MIMAT0019996 | cel-miR-4811-5p    | -1,05 | 0,918374 |
| MIMAT0022309 | cel-miR-5594-5p    | -1,03 | 0,919499 |
| MIMAT0020336 | cel-miR-245-5p     | 1,05  | 0,926397 |
| MIMAT0000307 | cel-miR-251        | 1,01  | 0,932803 |
| MIMAT0022192 | cel-miR-5550-3p    | 1,04  | 0,937224 |
| MIMAT0019999 | cel-miR-4812-3p    | -1,04 | 0,939622 |
| MIMAT0022186 | cel-miR-5547-3p    | -1,02 | 0,943496 |
| MIMAT0032799 | cel-miR-8193-5p    | -1,01 | 0,945869 |
| MIMAT0006590 | cel-miR-1823-3p    | -1,04 | 0,949789 |
| MIMAT0006774 | cel-miR-1832a-3p   | 1,02  | 0,964847 |
| MIMAT0006586 | cel-miR-1819-3p    | 1,01  | 0,975272 |
| MIMAT0015106 | cel-miR-65-3p      | 1     | 0,992929 |
| MIMAT0022310 | cel-miR-5594-3p    | 1     | 0,998543 |
| MIMAT0005822 | cel-miR-1019-5p    | 1     | 1        |
| MIMAT0005032 | cel-miR-1019-3p    | 1     | 1        |
| MIMAT0005522 | cel-miR-1021       | 1     | 1        |
| MIMAT0006585 | cel-miR-1818       | 1     | 1        |
| MIMAT0011426 | cel-miR-2207-3p    | 1     | 1        |
| MIMAT0011453 | cel-miR-2209b-5p   | 1     | 1        |
| MIMAT0011437 | cel-miR-2211-5p    | 1     | 1        |
| MIMAT0011445 | cel-miR-2215-5p    | 1     | 1        |
| MIMAT0032839 | cel-miR-2217b-1-5p | 1     | 1        |
| MIMAT0011455 | cel-miR-2218a-5p   | 1     | 1        |
| MIMAT0011456 | cel-miR-2218a-3p   | 1     | 1        |
| MIMAT0011457 | cel-miR-2218b-5p   | 1     | 1        |
| MIMAT0011458 | cel-miR-2218b-3p   | 1     | 1        |
| MIMAT0000311 | cel-miR-256        | 1     | 1        |
| MIMAT0000316 | cel-miR-261        | 1     | 1        |
| MIMAT0000320 | cel-miR-264        | 1     | 1        |
| MIMAT0000321 | cel-miR-265        | 1     | 1        |
| MIMAT0000323 | cel-miR-267        | 1     | 1        |
| MIMAT0000324 | cel-miR-268        | 1     | 1        |
| MIMAT0000326 | cel-miR-270        | 1     | 1        |
| MIMAT0000327 | cel-miR-271        | 1     | 1        |
| MIMAT0000328 | cel-miR-272        | 1     | 1        |
| MIMAT0000329 | cel-miR-273        | 1     | 1        |
| MIMAT0000698 | cel-miR-356a       | 1     | 1        |
| MIMAT0020127 | cel-miR-4921       | 1     | 1        |
| MIMAT0020134 | cel-miR-4927       | 1     | 1        |
| MIMAT0020136 | cel-miR-4930       | 1     | 1        |
| MIMAT0020137 | cel-miR-4931       | 1     | 1        |

|              |                  |   |   |
|--------------|------------------|---|---|
| MIMAT0020140 | cel-miR-4934     | 1 | 1 |
| MIMAT0020141 | cel-miR-4935     | 1 | 1 |
| MIMAT0020144 | cel-miR-4938     | 1 | 1 |
| MIMAT0022187 | cel-miR-5548-5p  | 1 | 1 |
| MIMAT0022188 | cel-miR-5548-3p  | 1 | 1 |
| MIMAT0022189 | cel-miR-5549-5p  | 1 | 1 |
| MIMAT0022308 | cel-miR-5593-3p  | 1 | 1 |
| MIMAT0020321 | cel-miR-76-5p    | 1 | 1 |
| MIMAT0032787 | cel-miR-8187-5p  | 1 | 1 |
| MIMAT0032790 | cel-miR-8188-3p  | 1 | 1 |
| MIMAT0032800 | cel-miR-8193-3p  | 1 | 1 |
| MIMAT0032805 | cel-miR-8196a-5p | 1 | 1 |
| MIMAT0032825 | cel-miR-8196b-5p | 1 | 1 |
| MIMAT0032807 | cel-miR-8197-5p  | 1 | 1 |
| MIMAT0032808 | cel-miR-8197-3p  | 1 | 1 |
| MIMAT0032813 | cel-miR-8200-5p  | 1 | 1 |
| MIMAT0032814 | cel-miR-8200-3p  | 1 | 1 |
| MIMAT0032824 | cel-miR-8204-3p  | 1 | 1 |
| MIMAT0032828 | cel-miR-8205-3p  | 1 | 1 |
| MIMAT0032831 | cel-miR-8207-5p  | 1 | 1 |
| MIMAT0032844 | cel-miR-8212-5p  | 1 | 1 |
