# Supplementary material
Source: publisher figshare collection journal article supplement (https://gsajournals.figshare.com/articles/dataset/_/8852180)
Supplement: Supplementary file 12 [file 1]

| miRBaseID    | MatureSymbol     | FoldChange alg-2 IR/N2 IR | pValue |
|--------------|------------------|---------------------------|--------|
| MIMAT0011432 | cel-miR-2209a-3p | -5,74                     | 0      |
| MIMAT0000007 | cel-miR-36-3p    | -7,31                     | 0      |
| MIMAT0000033 | cel-miR-61-3p    | -3,29                     | 0      |
| MIMAT0006770 | cel-miR-1829b-5p | -3,25                     | 0      |
| MIMAT0000302 | cel-miR-246-3p   | -2,35                     | 0      |
| MIMAT0000010 | cel-miR-39-3p    | -3,71                     | 0      |
| MIMAT0000008 | cel-miR-37-3p    | -4,72                     | 0      |
| MIMAT0011439 | cel-miR-2212-5p  | -2,53                     | 0      |
| MIMAT0020320 | cel-miR-74-5p    | 2,43                      | 0      |
| MIMAT0032016 | cel-miR-789-5p   | -2,14                     | 0      |
| MIMAT0020774 | cel-miR-77-5p    | 2,35                      | 0      |
| MIMAT0000036 | cel-miR-64-5p    | -1,34                     | 0      |
| MIMAT0015103 | cel-miR-61-5p    | -3,29                     | 0      |
| MIMAT0011429 | cel-miR-2208b-5p | -8,82                     | 0      |
| MIMAT0020337 | cel-miR-246-5p   | 2,33                      | 0      |
| MIMAT0015113 | cel-miR-230-5p   | -1,64                     | 0      |
| MIMAT0000044 | cel-miR-72-5p    | -1,25                     | 0      |
| MIMAT0000284 | cel-miR-229-5p   | -1,4                      | 0      |
| MIMAT0020771 | cel-miR-44-5p    | 2,06                      | 0      |
| MIMAT0020318 | cel-miR-72-3p    | 1,85                      | 0      |
| MIMAT0020772 | cel-miR-45-5p    | 1,71                      | 0      |
| MIMAT0000038 | cel-miR-66-5p    | -1,39                     | 0      |
| MIMAT0000006 | cel-miR-35-3p    | -4,11                     | 0      |
| MIMAT0006771 | cel-miR-1829c-5p | -1,53                     | 0      |
| MIMAT0004215 | cel-miR-253-3p   | -1,46                     | 0      |
| MIMAT0000027 | cel-miR-56-5p    | 1,53                      | 0      |
| MIMAT0000031 | cel-miR-59-3p    | 1,4                       | 0      |
| MIMAT0000037 | cel-miR-65-5p    | -1,27                     | 0      |
| MIMAT0022306 | cel-miR-5592-3p  | 1,38                      | 0      |
| MIMAT0015116 | cel-miR-240-5p   | 1,4                       | 0      |
| MIMAT0032017 | cel-miR-789-2-5p | -1,58                     | 0      |
| MIMAT0015114 | cel-miR-238-5p   | 1,61                      | 0      |
| MIMAT0000306 | cel-miR-250-3p   | -1,38                     | 0      |
| MIMAT0015107 | cel-miR-71-3p    | 1,54                      | 0      |
| MIMAT0005031 | cel-miR-1018     | -2,33                     | 0      |
| MIMAT0020303 | cel-miR-35-5p    | 1,85                      | 0      |
| MIMAT0015100 | cel-miR-58a-5p   | 1,69                      | 0      |
| MIMAT0000699 | cel-miR-357-3p   | -1,79                     | 0      |
| MIMAT0000011 | cel-miR-40-3p    | -6,06                     | 0      |
| MIMAT0020325 | cel-miR-87-5p    | 1,64                      | 0      |
| MIMAT0000290 | cel-miR-235-3p   | 1,21                      | 0      |
| MIMAT0020323 | cel-miR-82-5p    | 2,3                       | 0      |
| MIMAT0000294 | cel-miR-239a-5p  | 1,29                      | 0      |
| MIMAT0015095 | cel-miR-42-5p    | 2,66                      | 0      |
| MIMAT0015109 | cel-miR-81-5p    | 2,14                      | 0      |

|              |                  |              |                 |
|--------------|------------------|--------------|-----------------|
| MIMAT0020313 | cel-miR-55-5p    | 1,95         | 0               |
| MIMAT0000001 | cel-let-7-5p     | 1,3          | 0               |
| MIMAT0000058 | cel-miR-85-3p    | 1,21         | 0               |
| MIMAT0000012 | cel-miR-41-3p    | <b>-2,51</b> | <b>0</b>        |
| MIMAT0020301 | cel-miR-1-5p     | 1,65         | 0               |
| MIMAT0020334 | cel-miR-239a-3p  | 1,56         | 0               |
| MIMAT0020776 | cel-miR-86-3p    | 1,4          | 0               |
| MIMAT0000023 | cel-miR-52-5p    | -1,27        | 0               |
| MIMAT0011427 | cel-miR-2208a-5p | <b>-6,68</b> | <b>0</b>        |
| MIMAT0004228 | cel-miR-793      | -1,23        | 0               |
| MIMAT0000768 | cel-miR-392-3p   | -1,82        | 0               |
| MIMAT0000292 | cel-miR-237-5p   | 1,18         | 0               |
| MIMAT0005033 | cel-miR-1020-3p  | -1,73        | 0               |
| MIMAT0019998 | cel-miR-4812-5p  | <b>-2,75</b> | <b>0</b>        |
| MIMAT0020308 | cel-miR-43-5p    | <b>2,11</b>  | <b>0</b>        |
| MIMAT0022305 | cel-miR-5592-5p  | 1,21         | 0               |
| MIMAT0020006 | cel-miR-4816-3p  | -1,91        | 0               |
| MIMAT0015098 | cel-miR-48-3p    | 1,3          | 0               |
| MIMAT0015105 | cel-miR-64-3p    | 1,48         | 0               |
| MIMAT0020335 | cel-miR-241-3p   | -1,38        | 0               |
| MIMAT0011434 | cel-miR-2209c-3p | <b>-5,7</b>  | <b>0</b>        |
| MIMAT0020339 | cel-miR-250-5p   | 1,44         | 0               |
| MIMAT0000029 | cel-miR-57-5p    | 1,08         | 0               |
| MIMAT0015110 | cel-miR-84-3p    | 1,25         | 0,000001        |
| MIMAT0000030 | cel-miR-58a-3p   | 1,09         | 0,000001        |
| MIMAT0011430 | cel-miR-2208b-3p | <b>-4,59</b> | <b>0,000001</b> |
| MIMAT0020775 | cel-miR-83-5p    | <b>2,03</b>  | <b>0,000001</b> |
| MIMAT0000291 | cel-miR-236-3p   | -1,13        | 0,000001        |
| MIMAT0015120 | cel-miR-358-5p   | <b>-2,16</b> | <b>0,000001</b> |
| MIMAT0000700 | cel-miR-358-3p   | -1,38        | 0,000002        |
| MIMAT0020005 | cel-miR-4816-5p  | -1,8         | 0,000003        |
| MIMAT0020773 | cel-miR-54-5p    | 1,17         | 0,000005        |
| MIMAT0006584 | cel-miR-1817     | 1,31         | 0,000008        |
| MIMAT0020310 | cel-miR-50-3p    | 1,75         | 0,00001         |
| MIMAT0000285 | cel-miR-230-3p   | <b>-2,99</b> | <b>0,000019</b> |
| MIMAT0032811 | cel-miR-8199-5p  | <b>2,2</b>   | <b>0,00002</b>  |
| MIMAT0020311 | cel-miR-52-3p    | 1,39         | 0,000024        |
| MIMAT0004230 | cel-miR-795-5p   | -1,19        | 0,000037        |
| MIMAT0000045 | cel-miR-73-3p    | -1,14        | 0,000044        |
| MIMAT0020312 | cel-miR-53-3p    | 1,77         | 0,000045        |
| MIMAT0004219 | cel-miR-784-5p   | <b>-2,97</b> | <b>0,000049</b> |
| MIMAT0004224 | cel-miR-789-3p   | <b>-2,27</b> | <b>0,000056</b> |
| MIMAT0020770 | cel-miR-41-5p    | 1,21         | 0,0001          |
| MIMAT0000046 | cel-miR-74-3p    | -1,22        | 0,000164        |
| MIMAT0020305 | cel-miR-38-5p    | 1,91         | 0,000176        |
| MIMAT0020302 | cel-miR-2-5p     | 1,47         | 0,000252        |

|              |                  |              |                 |
|--------------|------------------|--------------|-----------------|
| MIMAT0020319 | cel-miR-73-5p    | <b>2,36</b>  | <b>0,000263</b> |
| MIMAT0019987 | cel-miR-4805-3p  | <b>-3,84</b> | <b>0,000274</b> |
| MIMAT0000019 | cel-miR-48-5p    | 1,1          | 0,000283        |
| MIMAT0011428 | cel-miR-2208a-3p | <b>-5,39</b> | <b>0,000335</b> |
| MIMAT0000061 | cel-miR-90-3p    | 1,07         | 0,000345        |
| MIMAT0015092 | cel-lin-4-3p     | 1,58         | 0,000352        |
| MIMAT0006589 | cel-miR-1822-3p  | -1,36        | 0,000357        |
| MIMAT0020000 | cel-miR-4813-5p  | 1,54         | 0,000366        |
| MIMAT0020778 | cel-miR-1830-3p  | 1,21         | 0,000494        |
| MIMAT0015099 | cel-miR-51-3p    | 1,29         | 0,000659        |
| MIMAT0000299 | cel-miR-243-3p   | -1,14        | 0,000672        |
| MIMAT0000009 | cel-miR-38-3p    | -1,17        | 0,000716        |
| MIMAT0011462 | cel-miR-2220-3p  | <b>-3,56</b> | <b>0,000842</b> |
| MIMAT0000305 | cel-miR-249-3p   | 1,14         | 0,000949        |
| MIMAT0020306 | cel-miR-39-5p    | 1,15         | 0,001164        |
| MIMAT0006769 | cel-miR-1829a-3p | <b>-2,71</b> | <b>0,001332</b> |
| MIMAT0000314 | cel-miR-259-5p   | 1,21         | 0,001609        |
| MIMAT0020322 | cel-miR-79-5p    | 1,49         | 0,001971        |
| MIMAT0020349 | cel-miR-790-3p   | 1,25         | 0,002232        |
| MIMAT0015108 | cel-miR-75-5p    | -1,48        | 0,002363        |
| MIMAT0000017 | cel-miR-46-3p    | 1,1          | 0,0027          |
| MIMAT0000053 | cel-miR-80-3p    | -1,19        | 0,003045        |
| MIMAT0005523 | cel-miR-1022-5p  | -1,13        | 0,003268        |
| MIMAT0020315 | cel-miR-66-3p    | 1,34         | 0,003471        |
| MIMAT0020353 | cel-miR-795-3p   | -1,37        | 0,00457         |
| MIMAT0006587 | cel-miR-1820-5p  | 1,13         | 0,005187        |
| MIMAT0011454 | cel-miR-2209b-3p | <b>-3,41</b> | <b>0,005419</b> |
| MIMAT0000298 | cel-miR-242      | 1,12         | 0,005502        |
| MIMAT0000022 | cel-miR-51-5p    | <b>-2,83</b> | <b>0,006686</b> |
| MIMAT0006586 | cel-miR-1819-3p  | <b>-2,01</b> | <b>0,007092</b> |
| MIMAT0020316 | cel-miR-67-5p    | 1,58         | 0,007538        |
| MIMAT0019995 | cel-miR-4810a    | <b>-2,36</b> | <b>0,008344</b> |
| MIMAT0000043 | cel-miR-71-5p    | -1,06        | 0,010227        |
| MIMAT0006772 | cel-miR-1830-5p  | 1,3          | 0,010337        |
| MIMAT0020344 | cel-miR-392-5p   | <b>-2,23</b> | <b>0,01083</b>  |
| MIMAT0000002 | cel-lin-4-5p     | 1,1          | 0,012565        |
| MIMAT0022312 | cel-miR-356b-3p  | 1,15         | 0,014057        |
| MIMAT0020326 | cel-miR-90-5p    | 1,24         | 0,014334        |
| MIMAT0032806 | cel-miR-8196a-3p | -1,34        | 0,01472         |
| MIMAT0000300 | cel-miR-244-5p   | -1,14        | 0,01533         |
| MIMAT0022307 | cel-miR-5593-5p  | <b>-3,05</b> | <b>0,016134</b> |
| MIMAT0000055 | cel-miR-82-3p    | 1,04         | 0,016152        |
| MIMAT0020126 | cel-miR-4920     | <b>-2,79</b> | <b>0,016232</b> |
| MIMAT0000749 | cel-lsy-6-3p     | -1,16        | 0,017128        |
| MIMAT0020001 | cel-miR-4813-3p  | 1,15         | 0,017914        |
| MIMAT0015094 | cel-miR-37-5p    | 1,12         | 0,021328        |

|              |                  |              |                 |
|--------------|------------------|--------------|-----------------|
| MIMAT0000060 | cel-miR-87-3p    | -1,09        | 0,024032        |
| MIMAT0000034 | cel-miR-62       | -1,16        | 0,024046        |
| MIMAT0014447 | cel-miR-2953-3p  | <b>-2,36</b> | <b>0,024941</b> |
| MIMAT0000020 | cel-miR-49-3p    | <b>-2,35</b> | <b>0,025023</b> |
| MIMAT0004235 | cel-miR-800-3p   | -1,34        | 0,026201        |
| MIMAT0022193 | cel-miR-5551-5p  | -1,26        | 0,027135        |
| MIMAT0019997 | cel-miR-4811-3p  | 1,46         | 0,028506        |
| MIMAT0020777 | cel-miR-232-5p   | 1,39         | 0,029034        |
| MIMAT0020314 | cel-miR-57-3p    | 1,8          | 0,031141        |
| MIMAT0004227 | cel-miR-792-3p   | -1,69        | 0,032374        |
| MIMAT0006588 | cel-miR-1821-3p  | -1,27        | 0,034603        |
| MIMAT0004222 | cel-miR-787-3p   | -1,14        | 0,042091        |
| MIMAT0020338 | cel-miR-249-5p   | <b>2,53</b>  | <b>0,046104</b> |
| MIMAT0006774 | cel-miR-1832a-3p | <b>-2,51</b> | <b>0,047745</b> |
| MIMAT0020128 | cel-miR-4922     | <b>-2,19</b> | <b>0,04798</b>  |
| MIMAT0032810 | cel-miR-8198-3p  | 1,28         | 0,049033        |
| MIMAT0000050 | cel-miR-78       | 1,13         | 0,050298        |
| MIMAT0015112 | cel-miR-229-3p   | 1,06         | 0,050575        |
| MIMAT0000287 | cel-miR-232-3p   | 1,1          | 0,053892        |
| MIMAT0015119 | cel-miR-247-5p   | <b>-2,39</b> | <b>0,054755</b> |
| MIMAT0000307 | cel-miR-251      | 1,39         | 0,059881        |
| MIMAT0000308 | cel-miR-252-5p   | 1,07         | 0,060901        |
| MIMAT0000024 | cel-miR-53-5p    | -1,07        | 0,061059        |
| MIMAT0015267 | cel-miR-1829a-5p | -1,19        | 0,06191         |
| MIMAT0011451 | cel-miR-2217a-5p | <b>-2,3</b>  | <b>0,064635</b> |
| MIMAT0019992 | cel-miR-4808-3p  | <b>-2,25</b> | <b>0,06717</b>  |
| MIMAT0000049 | cel-miR-77-3p    | -1,05        | 0,069997        |
| MIMAT0022196 | cel-miR-5552-3p  | <b>-2,33</b> | <b>0,070779</b> |
| MIMAT0015240 | cel-miR-788-3p   | 1,27         | 0,070827        |
| MIMAT0004220 | cel-miR-785-3p   | -1,06        | 0,071186        |
| MIMAT0032823 | cel-miR-8204-5p  | <b>2,19</b>  | <b>0,071188</b> |
| MIMAT0004226 | cel-miR-791-3p   | -1,59        | 0,07386         |
| MIMAT0000056 | cel-miR-83-3p    | -1,66        | 0,077349        |
| MIMAT0000289 | cel-miR-234-3p   | -1,74        | 0,078807        |
| MIMAT0006768 | cel-miR-1828     | -1,45        | 0,081534        |
| MIMAT0000003 | cel-miR-1-3p     | 1,06         | 0,081918        |
| MIMAT0000297 | cel-miR-241-5p   | -1,32        | 0,086014        |
| MIMAT0011431 | cel-miR-2209a-5p | <b>-2,16</b> | <b>0,100096</b> |
| MIMAT0000018 | cel-miR-47-3p    | 1,05         | 0,103694        |
| MIMAT0000028 | cel-miR-56-3p    | -1,79        | 0,123151        |
| MIMAT0011456 | cel-miR-2218a-3p | -1,89        | 0,128289        |
| MIMAT0000015 | cel-miR-44-3p    | 1,04         | 0,129003        |
| MIMAT0000016 | cel-miR-45-3p    | 1,04         | 0,129003        |
| MIMAT0015104 | cel-miR-63-5p    | -1,06        | 0,129264        |
| MIMAT0004234 | cel-miR-799      | 1,22         | 0,129482        |
| MIMAT0020004 | cel-miR-4815     | 1,85         | 0,131623        |

|              |                  |       |          |
|--------------|------------------|-------|----------|
| MIMAT0020357 | cel-miR-1022-3p  | 1,99  | 0,132893 |
| MIMAT0015118 | cel-miR-244-3p   | 1,37  | 0,140658 |
| MIMAT0000054 | cel-miR-81-3p    | -1,04 | 0,144333 |
| MIMAT0000283 | cel-miR-228-5p   | -1,24 | 0,14584  |
| MIMAT0032842 | cel-miR-8211-5p  | 1,83  | 0,146105 |
| MIMAT0032826 | cel-miR-8196b-3p | -1,77 | 0,150049 |
| MIMAT0000004 | cel-miR-2-3p     | -1,06 | 0,151523 |
| MIMAT0022197 | cel-miR-5553-5p  | -1,91 | 0,15421  |
| MIMAT0004223 | cel-miR-788-5p   | 1,14  | 0,154486 |
| MIMAT0000303 | cel-miR-247-3p   | -1,49 | 0,163678 |
| MIMAT0000288 | cel-miR-233-3p   | -1,05 | 0,165246 |
| MIMAT0020358 | cel-miR-1819-5p  | -1,66 | 0,165266 |
| MIMAT0020352 | cel-miR-794-3p   | -1,52 | 0,169712 |
| MIMAT0020143 | cel-miR-4937     | 1,16  | 0,180747 |
| MIMAT0032804 | cel-miR-8195-3p  | 1,83  | 0,181858 |
| MIMAT0000301 | cel-miR-245-3p   | -1,04 | 0,185452 |
| MIMAT0020329 | cel-miR-233-5p   | 1,51  | 0,186676 |
| MIMAT0015111 | cel-miR-124-5p   | -1,72 | 0,187715 |
| MIMAT0032799 | cel-miR-8193-5p  | 1,21  | 0,187796 |
| MIMAT0011458 | cel-miR-2218b-3p | 1,64  | 0,195233 |
| MIMAT0000701 | cel-miR-359      | 1,05  | 0,197242 |
| MIMAT0022192 | cel-miR-5550-3p  | -1,79 | 0,203052 |
| MIMAT0019988 | cel-miR-4806-5p  | -1,56 | 0,207335 |
| MIMAT0011433 | cel-miR-2209c-5p | -1,61 | 0,211433 |
| MIMAT0032791 | cel-miR-8189-5p  | -1,61 | 0,211476 |
| MIMAT0011425 | cel-miR-2207-5p  | -1,75 | 0,212686 |
| MIMAT0032832 | cel-miR-8207-3p  | -1,74 | 0,217037 |
| MIMAT0032795 | cel-miR-8191-5p  | 1,39  | 0,220859 |
| MIMAT0000026 | cel-miR-55-3p    | -1,39 | 0,22373  |
| MIMAT0015096 | cel-miR-46-5p    | 1,04  | 0,226058 |
| MIMAT0000329 | cel-miR-273      | 1,56  | 0,228022 |
| MIMAT0019990 | cel-miR-4807     | -1,67 | 0,231919 |
| MIMAT0000309 | cel-miR-253-5p   | 1,37  | 0,233945 |
| MIMAT0015117 | cel-miR-243-5p   | -1,04 | 0,23542  |
| MIMAT0015121 | cel-miR-360-5p   | -1,49 | 0,239064 |
| MIMAT0032817 | cel-miR-8202-5p  | 1,36  | 0,240467 |
| MIMAT0004216 | cel-miR-255-3p   | -1,21 | 0,244141 |
| MIMAT0015101 | cel-miR-59-5p    | 1,58  | 0,245062 |
| MIMAT0004221 | cel-miR-786-3p   | -1,25 | 0,252706 |
| MIMAT0019993 | cel-miR-4809-5p  | -1,51 | 0,264942 |
| MIMAT0032793 | cel-miR-8190-5p  | 1,48  | 0,265713 |
| MIMAT0011441 | cel-miR-2213-5p  | -1,47 | 0,27621  |
| MIMAT0011452 | cel-miR-2217a-3p | -1,42 | 0,277716 |
| MIMAT0000293 | cel-miR-238-3p   | -1,03 | 0,280382 |
| MIMAT0015091 | cel-let-7-3p     | -1,25 | 0,28322  |
| MIMAT0020342 | cel-miR-259-3p   | 1,07  | 0,283893 |

|              |                  |       |          |
|--------------|------------------|-------|----------|
| MIMAT0020327 | cel-miR-228-3p   | 1,09  | 0,284635 |
| MIMAT0015106 | cel-miR-65-3p    | -1,2  | 0,286519 |
| MIMAT0000042 | cel-miR-70-3p    | 1,02  | 0,304513 |
| MIMAT0032838 | cel-miR-8210-3p  | -1,43 | 0,304609 |
| MIMAT0022185 | cel-miR-5547-5p  | 1,55  | 0,307836 |
| MIMAT0020341 | cel-miR-255-5p   | 1,4   | 0,315601 |
| MIMAT0032830 | cel-miR-8206-3p  | 1,26  | 0,319843 |
| MIMAT0000702 | cel-miR-360-3p   | -1,39 | 0,327541 |
| MIMAT0032803 | cel-miR-8195-5p  | -1,58 | 0,329312 |
| MIMAT0011435 | cel-miR-2210-5p  | 1,48  | 0,330289 |
| MIMAT0032802 | cel-miR-8194-3p  | 1,37  | 0,333735 |
| MIMAT0020356 | cel-miR-1020-5p  | -1,54 | 0,343373 |
| MIMAT0000013 | cel-miR-42-3p    | -1,33 | 0,343891 |
| MIMAT0022184 | cel-miR-5546-3p  | -1,38 | 0,350175 |
| MIMAT0020142 | cel-miR-4936     | 1,2   | 0,350923 |
| MIMAT0006590 | cel-miR-1823-3p  | 1,55  | 0,354162 |
| MIMAT0020131 | cel-miR-4923b    | -1,52 | 0,368014 |
| MIMAT0020133 | cel-miR-4926     | 1,32  | 0,370392 |
| MIMAT0011450 | cel-miR-1832b-3p | 1,46  | 0,379846 |
| MIMAT0032812 | cel-miR-8199-3p  | 1,3   | 0,383248 |
| MIMAT0020324 | cel-miR-85-5p    | -1,49 | 0,39299  |
| MIMAT0011447 | cel-miR-2216-5p  | 1,12  | 0,393607 |
| MIMAT0000021 | cel-miR-50-5p    | -1,03 | 0,397335 |
| MIMAT0000048 | cel-miR-76-3p    | 1,04  | 0,399265 |
| MIMAT0020317 | cel-miR-70-5p    | 1,11  | 0,400742 |
| MIMAT0032794 | cel-miR-8190-3p  | -1,47 | 0,405479 |
| MIMAT0020132 | cel-miR-4925     | -1,45 | 0,405599 |
| MIMAT0032809 | cel-miR-8198-5p  | -1,28 | 0,407013 |
| MIMAT0020336 | cel-miR-245-5p   | -1,46 | 0,408929 |
| MIMAT0004232 | cel-miR-797-5p   | -1,27 | 0,409063 |
| MIMAT0011463 | cel-miR-2221     | -1,39 | 0,436673 |
| MIMAT0020130 | cel-miR-4924     | -1,25 | 0,445786 |
| MIMAT0006585 | cel-miR-1818     | 1,24  | 0,4468   |
| MIMAT0032814 | cel-miR-8200-3p  | 1,24  | 0,4468   |
| MIMAT0011449 | cel-miR-1832b-5p | 1,41  | 0,45825  |
| MIMAT0000697 | cel-miR-355-5p   | -1,03 | 0,463078 |
| MIMAT0032815 | cel-miR-8201-5p  | 1,19  | 0,46333  |
| MIMAT0032827 | cel-miR-8205-5p  | -1,22 | 0,467601 |
| MIMAT0020144 | cel-miR-4938     | -1,22 | 0,470312 |
| MIMAT0000051 | cel-miR-79-3p    | 1,03  | 0,472902 |
| MIMAT0020129 | cel-miR-4923a    | 1,32  | 0,475285 |
| MIMAT0022194 | cel-miR-5551-3p  | -1,33 | 0,475423 |
| MIMAT0020127 | cel-miR-4921     | -1,21 | 0,48802  |
| MIMAT0020351 | cel-miR-792-5p   | -1,21 | 0,489064 |
| MIMAT0032818 | cel-miR-8202-3p  | -1,21 | 0,489064 |
| MIMAT0019996 | cel-miR-4811-5p  | 1,35  | 0,501426 |

|              |                  |       |          |
|--------------|------------------|-------|----------|
| MIMAT0032808 | cel-miR-8197-3p  | 1,3   | 0,502246 |
| MIMAT0011442 | cel-miR-2213-3p  | 1,19  | 0,502326 |
| MIMAT0022314 | cel-miR-5595-3p  | 1,19  | 0,502326 |
| MIMAT0032805 | cel-miR-8196a-5p | 1,19  | 0,502326 |
| MIMAT0032825 | cel-miR-8196b-5p | 1,19  | 0,502326 |
| MIMAT0011461 | cel-miR-2220-5p  | 1,18  | 0,502909 |
| MIMAT0032798 | cel-miR-8192-3p  | 1,18  | 0,502909 |
| MIMAT0000696 | cel-miR-354-3p   | 1,18  | 0,508659 |
| MIMAT0032821 | cel-miR-4810b-5p | 1,18  | 0,508659 |
| MIMAT0032835 | cel-miR-8209-5p  | 1,18  | 0,508659 |
| MIMAT0022198 | cel-miR-5553-3p  | 1,29  | 0,517265 |
| MIMAT0020333 | cel-miR-237-3p   | -1,05 | 0,517869 |
| MIMAT0000032 | cel-miR-60-3p    | 1,03  | 0,522636 |
| MIMAT0032822 | cel-miR-4810b-3p | 1,32  | 0,531485 |
| MIMAT0015241 | cel-miR-797-3p   | 1,09  | 0,536386 |
| MIMAT0032841 | cel-miR-2217b-5p | -1,16 | 0,537972 |
| MIMAT0000057 | cel-miR-84-5p    | 1,02  | 0,540167 |
| MIMAT0031896 | cel-lsy-6-5p     | -1,16 | 0,548172 |
| MIMAT0020002 | cel-miR-4814-5p  | -1,22 | 0,548183 |
| MIMAT0000282 | cel-miR-124-3p   | -1,06 | 0,552883 |
| MIMAT0032833 | cel-miR-8208-5p  | -1,29 | 0,555127 |
| MIMAT0032034 | cel-miR-1821-5p  | 1,3   | 0,558002 |
| MIMAT0022191 | cel-miR-5550-5p  | 1,26  | 0,562897 |
| MIMAT0020328 | cel-miR-231-5p   | -1,11 | 0,563148 |
| MIMAT0032785 | cel-miR-8186-5p  | -1,28 | 0,567797 |
| MIMAT0020350 | cel-miR-791-5p   | 1,05  | 0,597445 |
| MIMAT0011438 | cel-miR-2211-3p  | -1,26 | 0,602096 |
| MIMAT0020140 | cel-miR-4934     | -1,21 | 0,616892 |
| MIMAT0022313 | cel-miR-5595-5p  | -1,21 | 0,616892 |
| MIMAT0000035 | cel-miR-63-3p    | 1,01  | 0,625555 |
| MIMAT0000322 | cel-miR-266      | 1,16  | 0,630845 |
| MIMAT0020361 | cel-miR-58b-5p   | -1,21 | 0,633493 |
| MIMAT0020003 | cel-miR-4814-3p  | 1,23  | 0,636563 |
| MIMAT0032039 | cel-miR-1832a-5p | 1,09  | 0,645563 |
| MIMAT0015097 | cel-miR-47-5p    | -1,02 | 0,64687  |
| MIMAT0004229 | cel-miR-794-5p   | -1,01 | 0,662155 |
| MIMAT0019999 | cel-miR-4812-3p  | 1,21  | 0,666776 |
| MIMAT0020304 | cel-miR-36-5p    | 1,03  | 0,670411 |
| MIMAT0011448 | cel-miR-2216-3p  | 1,22  | 0,671055 |
| MIMAT0015102 | cel-miR-60-5p    | 1,04  | 0,674906 |
| MIMAT0020347 | cel-miR-784-3p   | -1,06 | 0,675574 |
| MIMAT0019989 | cel-miR-4806-3p  | 1,2   | 0,67807  |
| MIMAT0032035 | cel-miR-1823-5p  | 1,15  | 0,678494 |
| MIMAT0020138 | cel-miR-4932     | 1,2   | 0,684405 |
| MIMAT0020360 | cel-miR-1824-3p  | 1,21  | 0,686304 |
| MIMAT0032834 | cel-miR-8208-3p  | -1,16 | 0,686343 |

|              |                  |       |          |
|--------------|------------------|-------|----------|
| MIMAT0004233 | cel-miR-798      | -1,04 | 0,695519 |
| MIMAT0000047 | cel-miR-75-3p    | -1,02 | 0,695714 |
| MIMAT0011446 | cel-miR-2215-3p  | -1,15 | 0,698655 |
| MIMAT0020307 | cel-miR-40-5p    | 1,07  | 0,706877 |
| MIMAT0022311 | cel-miR-356b-5p  | -1,16 | 0,709811 |
| MIMAT0000039 | cel-miR-67-3p    | 1,03  | 0,719132 |
| MIMAT0006591 | cel-miR-1824-5p  | -1,06 | 0,721913 |
| MIMAT0032792 | cel-miR-8189-3p  | -1,15 | 0,72639  |
| MIMAT0032816 | cel-miR-8201-3p  | 1,17  | 0,728088 |
| MIMAT0020354 | cel-miR-800-5p   | -1,07 | 0,731541 |
| MIMAT0022181 | cel-miR-5545-5p  | 1,09  | 0,731838 |
| MIMAT0022309 | cel-miR-5594-5p  | -1,1  | 0,741337 |
| MIMAT0019994 | cel-miR-4809-3p  | -1,13 | 0,753401 |
| MIMAT0032837 | cel-miR-8210-5p  | -1,09 | 0,754831 |
| MIMAT0000005 | cel-miR-34-5p    | 1,01  | 0,762271 |
| MIMAT0032829 | cel-miR-8206-5p  | 1,14  | 0,770571 |
| MIMAT0000286 | cel-miR-231-3p   | -1,02 | 0,77222  |
| MIMAT0011459 | cel-miR-2219-5p  | -1,09 | 0,775073 |
| MIMAT0032797 | cel-miR-8192-5p  | -1,14 | 0,77577  |
| MIMAT0011436 | cel-miR-2210-3p  | -1,04 | 0,77638  |
| MIMAT0015115 | cel-miR-239b-3p  | -1,13 | 0,783882 |
| MIMAT0000052 | cel-miR-80-5p    | 1,01  | 0,80225  |
| MIMAT0000014 | cel-miR-43-3p    | -1,03 | 0,804089 |
| MIMAT0019991 | cel-miR-4808-5p  | -1,12 | 0,813211 |
| MIMAT0032840 | cel-miR-2217b-3p | -1,06 | 0,826531 |
| MIMAT0032038 | cel-miR-1829c-3p | -1,06 | 0,829747 |
| MIMAT0005822 | cel-miR-1019-5p  | 1,1   | 0,835508 |
| MIMAT0004231 | cel-miR-796      | 1,1   | 0,837524 |
| MIMAT0020359 | cel-miR-1820-3p  | 1,08  | 0,843297 |
| MIMAT0000296 | cel-miR-240-3p   | 1,01  | 0,844018 |
| MIMAT0032820 | cel-miR-8203-3p  | -1,09 | 0,848337 |
| MIMAT0032843 | cel-miR-8211-3p  | 1,09  | 0,849835 |
| MIMAT0020139 | cel-miR-4933     | -1,06 | 0,85684  |
| MIMAT0015093 | cel-miR-34-3p    | -1,01 | 0,860649 |
| MIMAT0020330 | cel-miR-234-5p   | 1,08  | 0,868421 |
| MIMAT0000304 | cel-miR-248      | -1,01 | 0,870617 |
| MIMAT0031891 | cel-miR-254-5p   | 1,07  | 0,882048 |
| MIMAT0020135 | cel-miR-4929     | 1,03  | 0,88429  |
| MIMAT0015239 | cel-miR-786-5p   | -1,02 | 0,887506 |
| MIMAT0022190 | cel-miR-5549-3p  | 1,04  | 0,888391 |
| MIMAT0022310 | cel-miR-5594-3p  | -1,05 | 0,894364 |
| MIMAT0015266 | cel-miR-1822-5p  | -1,04 | 0,894862 |
| MIMAT0022195 | cel-miR-5552-5p  | -1,04 | 0,896797 |
| MIMAT0014446 | cel-miR-2953-5p  | -1,04 | 0,918921 |
| MIMAT0006775 | cel-miR-1833     | 1,03  | 0,924549 |
| MIMAT0006776 | cel-miR-58b-3p   | -1,04 | 0,927747 |



|              |                    |       |          |
|--------------|--------------------|-------|----------|
| MIMAT0000295 | cel-miR-239b-5p    | -1,01 | 0,936076 |
| MIMAT0000059 | cel-miR-86-5p      | 1     | 0,936134 |
| MIMAT0000310 | cel-miR-254-3p     | 1,01  | 0,948011 |
| MIMAT0020332 | cel-miR-236-5p     | -1,01 | 0,94897  |
| MIMAT0032037 | cel-miR-1829b-3p   | -1,01 | 0,952756 |
| MIMAT0032845 | cel-miR-8212-3p    | 1,01  | 0,954721 |
| MIMAT0020343 | cel-miR-357-5p     | 1,01  | 0,958549 |
| MIMAT0011460 | cel-miR-2219-3p    | -1,02 | 0,966299 |
| MIMAT0022186 | cel-miR-5547-3p    | 1,01  | 0,966642 |
| MIMAT0022182 | cel-miR-5545-3p    | -1,01 | 0,967199 |
| MIMAT0000025 | cel-miR-54-3p      | 1     | 0,969307 |
| MIMAT0020331 | cel-miR-235-5p     | -1,01 | 0,97917  |
| MIMAT0020309 | cel-miR-49-5p      | 1     | 0,981667 |
| MIMAT0032819 | cel-miR-8203-5p    | 1,01  | 0,985011 |
| MIMAT0020340 | cel-miR-252-3p     | -1,01 | 0,992925 |
| MIMAT0032786 | cel-miR-8186-3p    | 1     | 0,997642 |
| MIMAT0005032 | cel-miR-1019-3p    | 1     | 1        |
| MIMAT0005522 | cel-miR-1021       | 1     | 1        |
| MIMAT0011426 | cel-miR-2207-3p    | 1     | 1        |
| MIMAT0011453 | cel-miR-2209b-5p   | 1     | 1        |
| MIMAT0011437 | cel-miR-2211-5p    | 1     | 1        |
| MIMAT0011440 | cel-miR-2212-3p    | 1     | 1        |
| MIMAT0011445 | cel-miR-2215-5p    | 1     | 1        |
| MIMAT0032839 | cel-miR-2217b-1-5p | 1     | 1        |
| MIMAT0011455 | cel-miR-2218a-5p   | 1     | 1        |
| MIMAT0011457 | cel-miR-2218b-5p   | 1     | 1        |
| MIMAT0000311 | cel-miR-256        | 1     | 1        |
| MIMAT0000316 | cel-miR-261        | 1     | 1        |
| MIMAT0000320 | cel-miR-264        | 1     | 1        |
| MIMAT0000321 | cel-miR-265        | 1     | 1        |
| MIMAT0000323 | cel-miR-267        | 1     | 1        |
| MIMAT0000324 | cel-miR-268        | 1     | 1        |
| MIMAT0000325 | cel-miR-269        | 1     | 1        |
| MIMAT0000326 | cel-miR-270        | 1     | 1        |
| MIMAT0000327 | cel-miR-271        | 1     | 1        |
| MIMAT0000328 | cel-miR-272        | 1     | 1        |
| MIMAT0031894 | cel-miR-354-5p     | 1     | 1        |
| MIMAT0031895 | cel-miR-355-3p     | 1     | 1        |
| MIMAT0000698 | cel-miR-356a       | 1     | 1        |
| MIMAT0019986 | cel-miR-4805-5p    | 1     | 1        |
| MIMAT0020134 | cel-miR-4927       | 1     | 1        |
| MIMAT0020136 | cel-miR-4930       | 1     | 1        |
| MIMAT0020137 | cel-miR-4931       | 1     | 1        |
| MIMAT0020141 | cel-miR-4935       | 1     | 1        |
| MIMAT0022183 | cel-miR-5546-5p    | 1     | 1        |
| MIMAT0022187 | cel-miR-5548-5p    | 1     | 1        |

|              |                 |              |          |
|--------------|-----------------|--------------|----------|
| MIMAT0022188 | cel-miR-5548-3p | 1            | 1        |
| MIMAT0022189 | cel-miR-5549-5p | 1            | 1        |
| MIMAT0022308 | cel-miR-5593-3p | 1            | 1        |
| MIMAT0020321 | cel-miR-76-5p   | 1            | 1        |
| MIMAT0032015 | cel-miR-785-5p  | 1            | 1        |
| MIMAT0020348 | cel-miR-787-5p  | 1            | 1        |
| MIMAT0004225 | cel-miR-790-5p  | <b>-2,71</b> | <b>0</b> |
| MIMAT0032787 | cel-miR-8187-5p | 1            | 1        |
| MIMAT0032788 | cel-miR-8187-3p | 1            | 1        |
| MIMAT0032789 | cel-miR-8188-5p | 1            | 1        |
| MIMAT0032790 | cel-miR-8188-3p | 1            | 1        |
| MIMAT0032796 | cel-miR-8191-3p | 1            | 1        |
| MIMAT0032800 | cel-miR-8193-3p | 1            | 1        |
| MIMAT0032801 | cel-miR-8194-5p | 1            | 1        |
| MIMAT0032807 | cel-miR-8197-5p | 1            | 1        |
| MIMAT0032813 | cel-miR-8200-5p | 1            | 1        |
| MIMAT0032824 | cel-miR-8204-3p | 1            | 1        |
| MIMAT0032828 | cel-miR-8205-3p | 1            | 1        |
| MIMAT0032831 | cel-miR-8207-5p | 1            | 1        |
| MIMAT0032836 | cel-miR-8209-3p | 1            | 1        |
| MIMAT0032844 | cel-miR-8212-5p | 1            | 1        |
