# Supplementary material
Source: publisher figshare collection journal article supplement (https://gsajournals.figshare.com/articles/dataset/_/8852180)
Supplement: Supplementary file 17 [file 1]

| miRBaseID     | MatureSymbol     | FoldChange alg-2 IR/alg-2 NT | pValue   |
|---------------|------------------|------------------------------|----------|
| MIMAT0020320  | cel-miR-74-5p    | -1,65                        | 0        |
| MIMAT0020771  | cel-miR-44-5p    | -1,54                        | 0        |
| MIMAT0020306  | cel-miR-39-5p    | -1,36                        | 0        |
| MIMAT0015094  | cel-miR-37-5p    | -1,37                        | 0        |
| MIMAT0020304  | cel-miR-36-5p    | -1,42                        | 0        |
| MIMAT0000295  | cel-miR-239b-5p  | 1,25                         | 0        |
| MIMAT0015099  | cel-miR-51-3p    | -1,3                         | 0        |
| MIMAT0032811  | cel-miR-8199-5p  | -1,39                        | 0        |
| MIMAT0015114  | cel-miR-238-5p   | 1,23                         | 0,000001 |
| MIMAT0020772  | cel-miR-45-5p    | -1,16                        | 0,000011 |
| MIMAT0020000  | cel-miR-4813-5p  | -1,3                         | 0,000013 |
| MIMAT0020308  | cel-miR-43-5p    | -1,28                        | 0,000045 |
| MIMAT0020337  | cel-miR-246-5p   | 1,19                         | 0,000085 |
| MIMAT0032017  | cel-miR-789-2-5p | -1,16                        | 0,000162 |
| MIMAT0015105  | cel-miR-64-3p    | -1,2                         | 0,000353 |
| MIMAT0000009  | cel-miR-38-3p    | -1,16                        | 0,000523 |
| MIMAT0000008  | cel-miR-37-3p    | -1,12                        | 0,00068  |
| MIMAT0000299  | cel-miR-243-3p   | 1,13                         | 0,000825 |
| MIMAT0000302  | cel-miR-246-3p   | 1,06                         | 0,000967 |
| MIMAT0015095  | cel-miR-42-5p    | -1,2                         | 0,002728 |
| MIMAT0000013  | cel-miR-42-3p    | -1,2                         | 0,003472 |
| MIMAT0020334  | cel-miR-239a-3p  | 1,15                         | 0,003557 |
| MIMAT0020770  | cel-miR-41-5p    | -1,13                        | 0,004114 |
| MIMAT0000047  | cel-miR-75-3p    | 1,12                         | 0,007293 |
| MIMAT0000044  | cel-miR-72-5p    | 1,04                         | 0,013041 |
| MIMAT0000006  | cel-miR-35-3p    | -1,06                        | 0,01405  |
| MIMAT0000293  | cel-miR-238-3p   | 1,06                         | 0,014543 |
| MIMAT0015110  | cel-miR-84-3p    | -1,1                         | 0,015592 |
| MIMAT0000305  | cel-miR-249-3p   | 1,09                         | 0,016813 |
| MIMAT0020307  | cel-miR-40-5p    | -1,15                        | 0,019955 |
| MIMAT0000045  | cel-miR-73-3p    | -1,06                        | 0,023175 |
| MIMAT0015112  | cel-miR-229-3p   | -1,06                        | 0,025039 |
| MIMAT0000053  | cel-miR-80-3p    | 1,04                         | 0,027183 |
| MIMAT0032038  | cel-miR-1829c-3p | 1,11                         | 0,029678 |
| MIMAT0020328  | cel-miR-231-5p   | -1,14                        | 0,030465 |
| MIMAT0000034  | cel-miR-62       | 1,1                          | 0,033368 |
| MIMAT0020305  | cel-miR-38-5p    | -1,14                        | 0,037196 |
| MIMAT0015093  | cel-miR-34-3p    | 1,07                         | 0,037431 |
| MIMAT00005031 | cel-miR-1018     | -1,13                        | 0,039327 |
| MIMAT0032037  | cel-miR-1829b-3p | 1,1                          | 0,039843 |
| MIMAT0020001  | cel-miR-4813-3p  | 1,1                          | 0,041114 |
| MIMAT0020774  | cel-miR-77-5p    | -1,06                        | 0,044173 |
| MIMAT0014446  | cel-miR-2953-5p  | 1,07                         | 0,044569 |
| MIMAT0020311  | cel-miR-52-3p    | -1,11                        | 0,051526 |
| MIMAT0000029  | cel-miR-57-5p    | 1,03                         | 0,051839 |

|              |                  |       |          |
|--------------|------------------|-------|----------|
| MIMAT0000015 | cel-miR-44-3p    | -1,04 | 0,052381 |
| MIMAT0000016 | cel-miR-45-3p    | -1,04 | 0,052381 |
| MIMAT0020126 | cel-miR-4920     | -1,05 | 0,055412 |
| MIMAT0000291 | cel-miR-236-3p   | 1,04  | 0,05893  |
| MIMAT0032830 | cel-miR-8206-3p  | 1,1   | 0,062551 |
| MIMAT0020135 | cel-miR-4929     | 1,1   | 0,069515 |
| MIMAT0000303 | cel-miR-247-3p   | -1,09 | 0,070572 |
| MIMAT0000294 | cel-miR-239a-5p  | 1,04  | 0,071793 |
| MIMAT0000019 | cel-miR-48-5p    | 1,04  | 0,071794 |
| MIMAT0020312 | cel-miR-53-3p    | 1,12  | 0,072198 |
| MIMAT0020319 | cel-miR-73-5p    | -1,11 | 0,076033 |
| MIMAT0015097 | cel-miR-47-5p    | -1,08 | 0,077308 |
| MIMAT0004219 | cel-miR-784-5p   | -1,08 | 0,085434 |
| MIMAT0000004 | cel-miR-2-3p     | 1,04  | 0,099936 |
| MIMAT0000002 | cel-lin-4-5p     | -1,06 | 0,100332 |
| MIMAT0032794 | cel-miR-8190-3p  | -1,03 | 0,100584 |
| MIMAT0019988 | cel-miR-4806-5p  | -1,06 | 0,103332 |
| MIMAT0020143 | cel-miR-4937     | 1,11  | 0,10355  |
| MIMAT0015118 | cel-miR-244-3p   | -1,1  | 0,105546 |
| MIMAT0000309 | cel-miR-253-5p   | -1,09 | 0,106142 |
| MIMAT0006772 | cel-miR-1830-5p  | 1,1   | 0,1086   |
| MIMAT0000289 | cel-miR-234-3p   | -1,1  | 0,114323 |
| MIMAT0020301 | cel-miR-1-5p     | -1,08 | 0,119079 |
| MIMAT0004235 | cel-miR-800-3p   | -1,1  | 0,1222   |
| MIMAT0000699 | cel-miR-357-3p   | -1,09 | 0,12232  |
| MIMAT0000011 | cel-miR-40-3p    | -1,04 | 0,123386 |
| MIMAT0000283 | cel-miR-228-5p   | -1,09 | 0,124129 |
| MIMAT0000007 | cel-miR-36-3p    | -1,09 | 0,125385 |
| MIMAT0020322 | cel-miR-79-5p    | -1,09 | 0,126701 |
| MIMAT0022305 | cel-miR-5592-5p  | 1,05  | 0,137087 |
| MIMAT0015102 | cel-miR-60-5p    | -1,09 | 0,138109 |
| MIMAT0020359 | cel-miR-1820-3p  | 1,04  | 0,138649 |
| MIMAT0006586 | cel-miR-1819-3p  | -1,06 | 0,140816 |
| MIMAT0015104 | cel-miR-63-5p    | 1,06  | 0,141307 |
| MIMAT0015106 | cel-miR-65-3p    | -1,09 | 0,141603 |
| MIMAT0020333 | cel-miR-237-3p   | -1,09 | 0,142255 |
| MIMAT0020314 | cel-miR-57-3p    | 1,07  | 0,14295  |
| MIMAT0011447 | cel-miR-2216-5p  | 1,09  | 0,144344 |
| MIMAT0006774 | cel-miR-1832a-3p | -1,03 | 0,148874 |
| MIMAT0032792 | cel-miR-8189-3p  | -1,05 | 0,152526 |
| MIMAT0011429 | cel-miR-2208b-5p | -1,08 | 0,153453 |
| MIMAT0022196 | cel-miR-5552-3p  | -1,02 | 0,155372 |
| MIMAT0020325 | cel-miR-87-5p    | -1,06 | 0,156957 |
| MIMAT0022192 | cel-miR-5550-3p  | -1,04 | 0,16096  |
| MIMAT0015120 | cel-miR-358-5p   | 1,08  | 0,165239 |
| MIMAT0000038 | cel-miR-66-5p    | -1,04 | 0,165274 |

|              |                  |       |          |
|--------------|------------------|-------|----------|
| MIMAT0032803 | cel-miR-8195-5p  | -1,02 | 0,167091 |
| MIMAT0004220 | cel-miR-785-3p   | 1,04  | 0,178359 |
| MIMAT0020142 | cel-miR-4936     | -1,08 | 0,180514 |
| MIMAT0020315 | cel-miR-66-3p    | -1,09 | 0,181254 |
| MIMAT0020323 | cel-miR-82-5p    | -1,08 | 0,194582 |
| MIMAT0000298 | cel-miR-242      | 1,04  | 0,195774 |
| MIMAT0000042 | cel-miR-70-3p    | 1,03  | 0,196094 |
| MIMAT0000057 | cel-miR-84-5p    | 1,03  | 0,197652 |
| MIMAT0004215 | cel-miR-253-3p   | -1,04 | 0,199092 |
| MIMAT0020318 | cel-miR-72-3p    | 1,05  | 0,19952  |
| MIMAT0020309 | cel-miR-49-5p    | 1,07  | 0,207135 |
| MIMAT0004232 | cel-miR-797-5p   | -1,06 | 0,208415 |
| MIMAT0032823 | cel-miR-8204-5p  | 1,01  | 0,209233 |
| MIMAT0000035 | cel-miR-63-3p    | 1,04  | 0,21111  |
| MIMAT0015109 | cel-miR-81-5p    | -1,07 | 0,217066 |
| MIMAT0005822 | cel-miR-1019-5p  | 1,01  | 0,219627 |
| MIMAT0000020 | cel-miR-49-3p    | -1,07 | 0,224482 |
| MIMAT0032837 | cel-miR-8210-5p  | -1,06 | 0,229299 |
| MIMAT0000014 | cel-miR-43-3p    | -1,08 | 0,233605 |
| MIMAT0032840 | cel-miR-2217b-3p | 1,05  | 0,244768 |
| MIMAT0020358 | cel-miR-1819-5p  | 1,03  | 0,247708 |
| MIMAT0032815 | cel-miR-8201-5p  | -1,06 | 0,258206 |
| MIMAT0000701 | cel-miR-359      | 1,04  | 0,26315  |
| MIMAT0000031 | cel-miR-59-3p    | 1,03  | 0,263881 |
| MIMAT0015116 | cel-miR-240-5p   | 1,03  | 0,267133 |
| MIMAT0019998 | cel-miR-4812-5p  | 1,06  | 0,269748 |
| MIMAT0020357 | cel-miR-1022-3p  | 1,02  | 0,286868 |
| MIMAT0011450 | cel-miR-1832b-3p | 1,01  | 0,290023 |
| MIMAT0000017 | cel-miR-46-3p    | 1,03  | 0,293777 |
| MIMAT0006587 | cel-miR-1820-5p  | 1,04  | 0,295952 |
| MIMAT0000290 | cel-miR-235-3p   | -1,02 | 0,299785 |
| MIMAT0000056 | cel-miR-83-3p    | -1,04 | 0,301355 |
| MIMAT0000052 | cel-miR-80-5p    | -1,04 | 0,301659 |
| MIMAT0020347 | cel-miR-784-3p   | 1,06  | 0,304464 |
| MIMAT0000700 | cel-miR-358-3p   | 1,06  | 0,30561  |
| MIMAT0004229 | cel-miR-794-5p   | 1,04  | 0,307461 |
| MIMAT0015107 | cel-miR-71-3p    | -1,04 | 0,308788 |
| MIMAT0000287 | cel-miR-232-3p   | 1,04  | 0,309359 |
| MIMAT0020006 | cel-miR-4816-3p  | 1,06  | 0,311664 |
| MIMAT0019999 | cel-miR-4812-3p  | 1,02  | 0,312355 |
| MIMAT0020361 | cel-miR-58b-5p   | 1,02  | 0,313052 |
| MIMAT0006584 | cel-miR-1817     | 1,05  | 0,314556 |
| MIMAT0022310 | cel-miR-5594-3p  | 1,03  | 0,317887 |
| MIMAT0000314 | cel-miR-259-5p   | 1,05  | 0,319231 |
| MIMAT0020773 | cel-miR-54-5p    | -1,03 | 0,324011 |
| MIMAT0006768 | cel-miR-1828     | 1,05  | 0,327964 |

|              |                  |       |          |
|--------------|------------------|-------|----------|
| MIMAT0022191 | cel-miR-5550-5p  | 1,03  | 0,334627 |
| MIMAT0006589 | cel-miR-1822-3p  | 1,06  | 0,335506 |
| MIMAT0022198 | cel-miR-5553-3p  | -1,01 | 0,341158 |
| MIMAT0032039 | cel-miR-1832a-5p | 1,06  | 0,342461 |
| MIMAT0000749 | cel-lsy-6-3p     | -1,05 | 0,346515 |
| MIMAT0000005 | cel-miR-34-5p    | 1,04  | 0,359383 |
| MIMAT0011448 | cel-miR-2216-3p  | 1,01  | 0,363782 |
| MIMAT0004230 | cel-miR-795-5p   | 1,04  | 0,366352 |
| MIMAT0000059 | cel-miR-86-5p    | 1,03  | 0,369852 |
| MIMAT0000010 | cel-miR-39-3p    | -1,05 | 0,371362 |
| MIMAT0000030 | cel-miR-58a-3p   | 1,01  | 0,373015 |
| MIMAT0011458 | cel-miR-2218b-3p | 1,01  | 0,373858 |
| MIMAT0006771 | cel-miR-1829c-5p | 1,04  | 0,373899 |
| MIMAT0000697 | cel-miR-355-5p   | 1,04  | 0,374668 |
| MIMAT0032804 | cel-miR-8195-3p  | -1,03 | 0,374766 |
| MIMAT0031895 | cel-miR-355-3p   | -1,01 | 0,37523  |
| MIMAT0000025 | cel-miR-54-3p    | 1,02  | 0,375534 |
| MIMAT0011451 | cel-miR-2217a-5p | -1,01 | 0,379189 |
| MIMAT0020778 | cel-miR-1830-3p  | 1,04  | 0,379429 |
| MIMAT0019994 | cel-miR-4809-3p  | 1,02  | 0,382433 |
| MIMAT0022195 | cel-miR-5552-5p  | 1,04  | 0,395247 |
| MIMAT0020332 | cel-miR-236-5p   | -1,05 | 0,398313 |
| MIMAT0000702 | cel-miR-360-3p   | -1,01 | 0,398672 |
| MIMAT0000306 | cel-miR-250-3p   | 1,02  | 0,400335 |
| MIMAT0020338 | cel-miR-249-5p   | 1,02  | 0,403775 |
| MIMAT0020349 | cel-miR-790-3p   | -1,04 | 0,410128 |
| MIMAT0006591 | cel-miR-1824-5p  | 1,05  | 0,415193 |
| MIMAT0011432 | cel-miR-2209a-3p | -1,05 | 0,417626 |
| MIMAT0022182 | cel-miR-5545-3p  | 1,02  | 0,418997 |
| MIMAT0000329 | cel-miR-273      | 1,01  | 0,422103 |
| MIMAT0019992 | cel-miR-4808-3p  | -1,01 | 0,424385 |
| MIMAT0019986 | cel-miR-4805-5p  | -1,01 | 0,425888 |
| MIMAT0015103 | cel-miR-61-5p    | -1,05 | 0,426618 |
| MIMAT0011460 | cel-miR-2219-3p  | -1,01 | 0,427668 |
| MIMAT0000768 | cel-miR-392-3p   | -1,05 | 0,429585 |
| MIMAT0014447 | cel-miR-2953-3p  | -1,02 | 0,430433 |
| MIMAT0031896 | cel-lsy-6-5p     | -1,01 | 0,432846 |
| MIMAT0000286 | cel-miR-231-3p   | 1,04  | 0,433959 |
| MIMAT0022190 | cel-miR-5549-3p  | 1,04  | 0,434358 |
| MIMAT0000001 | cel-let-7-5p     | 1,04  | 0,439916 |
| MIMAT0000304 | cel-miR-248      | 1,02  | 0,439989 |
| MIMAT0004228 | cel-miR-793      | 1,02  | 0,440899 |
| MIMAT0032832 | cel-miR-8207-3p  | -1,01 | 0,441652 |
| MIMAT0022185 | cel-miR-5547-5p  | 1,02  | 0,44196  |
| MIMAT0032786 | cel-miR-8186-3p  | 1,01  | 0,447223 |
| MIMAT0020129 | cel-miR-4923a    | 1,01  | 0,44761  |

|              |                  |       |          |
|--------------|------------------|-------|----------|
| MIMAT0020004 | cel-miR-4815     | 1,01  | 0,44965  |
| MIMAT0020330 | cel-miR-234-5p   | -1,01 | 0,451803 |
| MIMAT0000058 | cel-miR-85-3p    | 1,01  | 0,453406 |
| MIMAT0020324 | cel-miR-85-5p    | -1,01 | 0,456784 |
| MIMAT0000310 | cel-miR-254-3p   | -1,04 | 0,458812 |
| MIMAT0020353 | cel-miR-795-3p   | 1,05  | 0,46108  |
| MIMAT0020128 | cel-miR-4922     | -1,02 | 0,461802 |
| MIMAT0022312 | cel-miR-356b-3p  | 1,04  | 0,465582 |
| MIMAT0032808 | cel-miR-8197-3p  | 1,01  | 0,469831 |
| MIMAT0000285 | cel-miR-230-3p   | -1,04 | 0,471512 |
| MIMAT0015117 | cel-miR-243-5p   | 1,03  | 0,471668 |
| MIMAT0020340 | cel-miR-252-3p   | 1,01  | 0,474424 |
| MIMAT0011428 | cel-miR-2208a-3p | -1,01 | 0,475958 |
| MIMAT0015239 | cel-miR-786-5p   | 1,04  | 0,478184 |
| MIMAT0015121 | cel-miR-360-5p   | -1,01 | 0,487296 |
| MIMAT0000046 | cel-miR-74-3p    | 1,03  | 0,488025 |
| MIMAT0022307 | cel-miR-5593-5p  | -1,01 | 0,489257 |
| MIMAT0032836 | cel-miR-8209-3p  | -1,01 | 0,489257 |
| MIMAT0032809 | cel-miR-8198-5p  | -1,01 | 0,489525 |
| MIMAT0000051 | cel-miR-79-3p    | 1,02  | 0,495931 |
| MIMAT0022309 | cel-miR-5594-5p  | -1,03 | 0,497187 |
| MIMAT0020775 | cel-miR-83-5p    | 1,04  | 0,498096 |
| MIMAT0032842 | cel-miR-8211-5p  | 1,02  | 0,49947  |
| MIMAT0011435 | cel-miR-2210-5p  | 1,02  | 0,499508 |
| MIMAT0020132 | cel-miR-4925     | 1,01  | 0,500656 |
| MIMAT0020133 | cel-miR-4926     | 1,01  | 0,501012 |
| MIMAT0000024 | cel-miR-53-5p    | 1,02  | 0,501149 |
| MIMAT0011430 | cel-miR-2208b-3p | -1,02 | 0,504587 |
| MIMAT0006585 | cel-miR-1818     | 1,01  | 0,506128 |
| MIMAT0032814 | cel-miR-8200-3p  | 1,01  | 0,506128 |
| MIMAT0032820 | cel-miR-8203-3p  | 1,01  | 0,519513 |
| MIMAT0000032 | cel-miR-60-3p    | 1,01  | 0,519982 |
| MIMAT0032795 | cel-miR-8191-5p  | 1,03  | 0,524407 |
| MIMAT0022186 | cel-miR-5547-3p  | -1,03 | 0,524657 |
| MIMAT0000061 | cel-miR-90-3p    | 1,01  | 0,527595 |
| MIMAT0032035 | cel-miR-1823-5p  | -1,01 | 0,529613 |
| MIMAT0031894 | cel-miR-354-5p   | 1     | 0,529735 |
| MIMAT0032015 | cel-miR-785-5p   | 1     | 0,529735 |
| MIMAT0032818 | cel-miR-8202-3p  | 1     | 0,529735 |
| MIMAT0022183 | cel-miR-5546-5p  | 1     | 0,530078 |
| MIMAT0032827 | cel-miR-8205-5p  | 1     | 0,530078 |
| MIMAT0032838 | cel-miR-8210-3p  | 1     | 0,530078 |
| MIMAT0000022 | cel-miR-51-5p    | 1,02  | 0,530477 |
| MIMAT0032796 | cel-miR-8191-3p  | 1     | 0,533737 |
| MIMAT0000048 | cel-miR-76-3p    | 1,02  | 0,533997 |
| MIMAT0015267 | cel-miR-1829a-5p | -1,04 | 0,534717 |

|              |                  |       |          |
|--------------|------------------|-------|----------|
| MIMAT0032785 | cel-miR-8186-5p  | -1,01 | 0,537874 |
| MIMAT0020302 | cel-miR-2-5p     | -1,04 | 0,542093 |
| MIMAT0020310 | cel-miR-50-3p    | -1,04 | 0,545013 |
| MIMAT0011446 | cel-miR-2215-3p  | 1     | 0,546541 |
| MIMAT0020139 | cel-miR-4933     | 1     | 0,546541 |
| MIMAT0022314 | cel-miR-5595-3p  | 1     | 0,546541 |
| MIMAT0032805 | cel-miR-8196a-5p | 1     | 0,546541 |
| MIMAT0032825 | cel-miR-8196b-5p | 1     | 0,546541 |
| MIMAT0032798 | cel-miR-8192-3p  | 1     | 0,54741  |
| MIMAT0006590 | cel-miR-1823-3p  | -1,01 | 0,553104 |
| MIMAT0000696 | cel-miR-354-3p   | 1     | 0,553131 |
| MIMAT0032821 | cel-miR-4810b-5p | 1     | 0,553131 |
| MIMAT0020140 | cel-miR-4934     | 1     | 0,553131 |
| MIMAT0022313 | cel-miR-5595-5p  | 1     | 0,553131 |
| MIMAT0000296 | cel-miR-240-3p   | -1,02 | 0,553302 |
| MIMAT0020002 | cel-miR-4814-5p  | 1,02  | 0,561238 |
| MIMAT0022311 | cel-miR-356b-5p  | -1,01 | 0,563371 |
| MIMAT0004221 | cel-miR-786-3p   | 1,03  | 0,565077 |
| MIMAT0006770 | cel-miR-1829b-5p | 1,02  | 0,568018 |
| MIMAT0032817 | cel-miR-8202-5p  | 1,03  | 0,576974 |
| MIMAT0020342 | cel-miR-259-3p   | -1,03 | 0,577214 |
| MIMAT0000023 | cel-miR-52-5p    | 1,01  | 0,578749 |
| MIMAT0004231 | cel-miR-796      | -1,01 | 0,57915  |
| MIMAT0004233 | cel-miR-798      | -1,04 | 0,579872 |
| MIMAT0032819 | cel-miR-8203-5p  | -1,01 | 0,582962 |
| MIMAT0020356 | cel-miR-1020-5p  | -1,01 | 0,5844   |
| MIMAT0004224 | cel-miR-789-3p   | 1,03  | 0,585764 |
| MIMAT0031891 | cel-miR-254-5p   | 1,01  | 0,587115 |
| MIMAT0015240 | cel-miR-788-3p   | -1,04 | 0,587347 |
| MIMAT0020329 | cel-miR-233-5p   | -1,02 | 0,591124 |
| MIMAT0000049 | cel-miR-77-3p    | 1,01  | 0,597203 |
| MIMAT0011431 | cel-miR-2209a-5p | -1,01 | 0,612624 |
| MIMAT0000027 | cel-miR-56-5p    | -1,01 | 0,616564 |
| MIMAT0000018 | cel-miR-47-3p    | 1,01  | 0,617436 |
| MIMAT0000028 | cel-miR-56-3p    | -1,01 | 0,627245 |
| MIMAT0015091 | cel-let-7-3p     | 1,03  | 0,629778 |
| MIMAT0020344 | cel-miR-392-5p   | -1,01 | 0,629812 |
| MIMAT0019987 | cel-miR-4805-3p  | -1,01 | 0,630372 |
| MIMAT0000307 | cel-miR-251      | 1,03  | 0,633725 |
| MIMAT0015101 | cel-miR-59-5p    | -1,01 | 0,637532 |
| MIMAT0032806 | cel-miR-8196a-3p | 1,03  | 0,639249 |
| MIMAT0015096 | cel-miR-46-5p    | -1,01 | 0,643819 |
| MIMAT0006776 | cel-miR-58b-3p   | -1,01 | 0,645204 |
| MIMAT0020343 | cel-miR-357-5p   | 1     | 0,659573 |
| MIMAT0020331 | cel-miR-235-5p   | 1,01  | 0,663917 |
| MIMAT0020352 | cel-miR-794-3p   | 1,01  | 0,668089 |

|              |                  |       |          |
|--------------|------------------|-------|----------|
| MIMAT0000037 | cel-miR-65-5p    | 1,01  | 0,671815 |
| MIMAT0011434 | cel-miR-2209c-3p | 1,01  | 0,674164 |
| MIMAT0020354 | cel-miR-800-5p   | -1,03 | 0,674573 |
| MIMAT0032799 | cel-miR-8193-5p  | 1,03  | 0,676946 |
| MIMAT0000292 | cel-miR-237-5p   | 1,01  | 0,677324 |
| MIMAT0019991 | cel-miR-4808-5p  | -1,01 | 0,678447 |
| MIMAT0032016 | cel-miR-789-5p   | -1,01 | 0,678541 |
| MIMAT0004223 | cel-miR-788-5p   | -1,02 | 0,679224 |
| MIMAT0000300 | cel-miR-244-5p   | 1,02  | 0,684694 |
| MIMAT0004222 | cel-miR-787-3p   | 1,02  | 0,686653 |
| MIMAT0020313 | cel-miR-55-5p    | -1,02 | 0,687736 |
| MIMAT0020360 | cel-miR-1824-3p  | 1,01  | 0,688111 |
| MIMAT0000322 | cel-miR-266      | -1,01 | 0,692843 |
| MIMAT0011425 | cel-miR-2207-5p  | -1,01 | 0,695159 |
| MIMAT0011449 | cel-miR-1832b-5p | 1,01  | 0,697088 |
| MIMAT0020335 | cel-miR-241-3p   | 1,02  | 0,69921  |
| MIMAT0019996 | cel-miR-4811-5p  | 1,01  | 0,701645 |
| MIMAT0011436 | cel-miR-2210-3p  | 1,02  | 0,705773 |
| MIMAT0020316 | cel-miR-67-5p    | -1,02 | 0,708133 |
| MIMAT0022181 | cel-miR-5545-5p  | 1,02  | 0,709575 |
| MIMAT0011459 | cel-miR-2219-5p  | -1,01 | 0,720006 |
| MIMAT0015241 | cel-miR-797-3p   | 1,02  | 0,720417 |
| MIMAT0032826 | cel-miR-8196b-3p | 1,01  | 0,727869 |
| MIMAT0020350 | cel-miR-791-5p   | -1,02 | 0,732236 |
| MIMAT0005033 | cel-miR-1020-3p  | -1,02 | 0,736107 |
| MIMAT0011454 | cel-miR-2209b-3p | 1,01  | 0,736388 |
| MIMAT0020005 | cel-miR-4816-5p  | -1,02 | 0,738881 |
| MIMAT0020339 | cel-miR-250-5p   | -1,02 | 0,739972 |
| MIMAT0000003 | cel-miR-1-3p     | -1,01 | 0,745159 |
| MIMAT0015098 | cel-miR-48-3p    | 1,01  | 0,752431 |
| MIMAT0020341 | cel-miR-255-5p   | 1,01  | 0,753562 |
| MIMAT0011452 | cel-miR-2217a-3p | -1,01 | 0,757788 |
| MIMAT0020777 | cel-miR-232-5p   | -1,02 | 0,767727 |
| MIMAT0022197 | cel-miR-5553-5p  | 1,01  | 0,768563 |
| MIMAT0019989 | cel-miR-4806-3p  | -1,01 | 0,772555 |
| MIMAT0011461 | cel-miR-2220-5p  | 1     | 0,776852 |
| MIMAT0032793 | cel-miR-8190-5p  | 1     | 0,780801 |
| MIMAT0006588 | cel-miR-1821-3p  | -1,01 | 0,785824 |
| MIMAT0000284 | cel-miR-229-5p   | 1,01  | 0,789653 |
| MIMAT0011427 | cel-miR-2208a-5p | 1,01  | 0,791763 |
| MIMAT0011462 | cel-miR-2220-3p  | -1,01 | 0,792277 |
| MIMAT0032845 | cel-miR-8212-3p  | 1,01  | 0,803033 |
| MIMAT0004225 | cel-miR-790-5p   | 1,01  | 0,804709 |
| MIMAT0015111 | cel-miR-124-5p   | 1,01  | 0,806441 |
| MIMAT0011463 | cel-miR-2221     | 1,01  | 0,809869 |
| MIMAT0032816 | cel-miR-8201-3p  | 1     | 0,810636 |

|              |                  |       |          |
|--------------|------------------|-------|----------|
| MIMAT0000301 | cel-miR-245-3p   | 1,01  | 0,81505  |
| MIMAT0000308 | cel-miR-252-5p   | 1,01  | 0,820447 |
| MIMAT0019997 | cel-miR-4811-3p  | 1,01  | 0,822069 |
| MIMAT0022184 | cel-miR-5546-3p  | -1,01 | 0,825642 |
| MIMAT0032812 | cel-miR-8199-3p  | 1     | 0,826895 |
| MIMAT0015115 | cel-miR-239b-3p  | 1     | 0,827635 |
| MIMAT0004234 | cel-miR-799      | 1,01  | 0,828003 |
| MIMAT0032833 | cel-miR-8208-5p  | 1     | 0,828099 |
| MIMAT0006769 | cel-miR-1829a-3p | 1,01  | 0,830744 |
| MIMAT0020336 | cel-miR-245-5p   | 1     | 0,830799 |
| MIMAT0020327 | cel-miR-228-3p   | -1,01 | 0,833195 |
| MIMAT0011438 | cel-miR-2211-3p  | 1     | 0,836744 |
| MIMAT0000036 | cel-miR-64-5p    | 1     | 0,837014 |
| MIMAT0000050 | cel-miR-78       | 1,01  | 0,837113 |
| MIMAT0000282 | cel-miR-124-3p   | -1,01 | 0,837185 |
| MIMAT0022193 | cel-miR-5551-5p  | -1,01 | 0,84     |
| MIMAT0000054 | cel-miR-81-3p    | 1,01  | 0,844465 |
| MIMAT0032034 | cel-miR-1821-5p  | 1     | 0,868834 |
| MIMAT0005523 | cel-miR-1022-5p  | 1,01  | 0,874335 |
| MIMAT0022306 | cel-miR-5592-3p  | 1,01  | 0,87642  |
| MIMAT0020003 | cel-miR-4814-3p  | -1,01 | 0,876474 |
| MIMAT0015266 | cel-miR-1822-5p  | -1,01 | 0,876756 |
| MIMAT0000297 | cel-miR-241-5p   | 1,01  | 0,879346 |
| MIMAT0000060 | cel-miR-87-3p    | -1,01 | 0,886998 |
| MIMAT0032802 | cel-miR-8194-3p  | 1     | 0,88954  |
| MIMAT0020303 | cel-miR-35-5p    | 1,01  | 0,896253 |
| MIMAT0004216 | cel-miR-255-3p   | -1,01 | 0,898733 |
| MIMAT0019990 | cel-miR-4807     | 1     | 0,902025 |
| MIMAT0011439 | cel-miR-2212-5p  | 1,01  | 0,911815 |
| MIMAT0015113 | cel-miR-230-5p   | 1     | 0,912235 |
| MIMAT0000012 | cel-miR-41-3p    | -1,01 | 0,913233 |
| MIMAT0004227 | cel-miR-792-3p   | 1,01  | 0,914365 |
| MIMAT0032829 | cel-miR-8206-5p  | 1     | 0,914408 |
| MIMAT0019995 | cel-miR-4810a    | 1     | 0,914627 |
| MIMAT0032797 | cel-miR-8192-5p  | 1     | 0,915572 |
| MIMAT0000039 | cel-miR-67-3p    | -1,01 | 0,916229 |
| MIMAT0032810 | cel-miR-8198-3p  | -1,01 | 0,916538 |
| MIMAT0015119 | cel-miR-247-5p   | 1     | 0,92539  |
| MIMAT0000026 | cel-miR-55-3p    | 1     | 0,943786 |
| MIMAT0000288 | cel-miR-233-3p   | 1     | 0,947214 |
| MIMAT0020138 | cel-miR-4932     | 1     | 0,951826 |
| MIMAT0015092 | cel-lin-4-3p     | -1,01 | 0,952843 |
| MIMAT0020317 | cel-miR-70-5p    | 1,01  | 0,953363 |
| MIMAT0000043 | cel-miR-71-5p    | 1     | 0,953544 |
| MIMAT0032835 | cel-miR-8209-5p  | 1     | 0,953735 |
| MIMAT0032843 | cel-miR-8211-3p  | 1     | 0,955703 |



|              |                    |   |          |
|--------------|--------------------|---|----------|
| MIMAT0015100 | cel-miR-58a-5p     | 1 | 0,958372 |
| MIMAT0032834 | cel-miR-8208-3p    | 1 | 0,958389 |
| MIMAT0032822 | cel-miR-4810b-3p   | 1 | 0,958874 |
| MIMAT0000033 | cel-miR-61-3p      | 1 | 0,967641 |
| MIMAT0020776 | cel-miR-86-3p      | 1 | 0,970195 |
| MIMAT0020131 | cel-miR-4923b      | 1 | 0,970784 |
| MIMAT0022194 | cel-miR-5551-3p    | 1 | 0,975795 |
| MIMAT0006775 | cel-miR-1833       | 1 | 0,979453 |
| MIMAT0020326 | cel-miR-90-5p      | 1 | 0,980931 |
| MIMAT0000055 | cel-miR-82-3p      | 1 | 0,987148 |
| MIMAT0004226 | cel-miR-791-3p     | 1 | 0,988153 |
| MIMAT0015108 | cel-miR-75-5p      | 1 | 0,993205 |
| MIMAT0000021 | cel-miR-50-5p      | 1 | 0,993892 |
| MIMAT0011442 | cel-miR-2213-3p    | 1 | 0,997846 |
| MIMAT0005032 | cel-miR-1019-3p    | 1 | 1        |
| MIMAT0005522 | cel-miR-1021       | 1 | 1        |
| MIMAT0011426 | cel-miR-2207-3p    | 1 | 1        |
| MIMAT0011453 | cel-miR-2209b-5p   | 1 | 1        |
| MIMAT0011433 | cel-miR-2209c-5p   | 1 | 1        |
| MIMAT0011437 | cel-miR-2211-5p    | 1 | 1        |
| MIMAT0011440 | cel-miR-2212-3p    | 1 | 1        |
| MIMAT0011441 | cel-miR-2213-5p    | 1 | 1        |
| MIMAT0011445 | cel-miR-2215-5p    | 1 | 1        |
| MIMAT0032839 | cel-miR-2217b-1-5p | 1 | 1        |
| MIMAT0032841 | cel-miR-2217b-5p   | 1 | 1        |
| MIMAT0011455 | cel-miR-2218a-5p   | 1 | 1        |
| MIMAT0011456 | cel-miR-2218a-3p   | 1 | 1        |
| MIMAT0011457 | cel-miR-2218b-5p   | 1 | 1        |
| MIMAT0000311 | cel-miR-256        | 1 | 1        |
| MIMAT0000316 | cel-miR-261        | 1 | 1        |
| MIMAT0000320 | cel-miR-264        | 1 | 1        |
| MIMAT0000321 | cel-miR-265        | 1 | 1        |
| MIMAT0000323 | cel-miR-267        | 1 | 1        |
| MIMAT0000324 | cel-miR-268        | 1 | 1        |
| MIMAT0000325 | cel-miR-269        | 1 | 1        |
| MIMAT0000326 | cel-miR-270        | 1 | 1        |
| MIMAT0000327 | cel-miR-271        | 1 | 1        |
| MIMAT0000328 | cel-miR-272        | 1 | 1        |
| MIMAT0000698 | cel-miR-356a       | 1 | 1        |
| MIMAT0019993 | cel-miR-4809-5p    | 1 | 1        |
| MIMAT0020127 | cel-miR-4921       | 1 | 1        |
| MIMAT0020130 | cel-miR-4924       | 1 | 1        |
| MIMAT0020134 | cel-miR-4927       | 1 | 1        |
| MIMAT0020136 | cel-miR-4930       | 1 | 1        |
| MIMAT0020137 | cel-miR-4931       | 1 | 1        |
| MIMAT0020141 | cel-miR-4935       | 1 | 1        |

|              |                 |   |   |
|--------------|-----------------|---|---|
| MIMAT0020144 | cel-miR-4938    | 1 | 1 |
| MIMAT0022187 | cel-miR-5548-5p | 1 | 1 |
| MIMAT0022188 | cel-miR-5548-3p | 1 | 1 |
| MIMAT0022189 | cel-miR-5549-5p | 1 | 1 |
| MIMAT0022308 | cel-miR-5593-3p | 1 | 1 |
| MIMAT0020321 | cel-miR-76-5p   | 1 | 1 |
| MIMAT0020348 | cel-miR-787-5p  | 1 | 1 |
| MIMAT0020351 | cel-miR-792-5p  | 1 | 1 |
| MIMAT0032787 | cel-miR-8187-5p | 1 | 1 |
| MIMAT0032788 | cel-miR-8187-3p | 1 | 1 |
| MIMAT0032789 | cel-miR-8188-5p | 1 | 1 |
| MIMAT0032790 | cel-miR-8188-3p | 1 | 1 |
| MIMAT0032791 | cel-miR-8189-5p | 1 | 1 |
| MIMAT0032800 | cel-miR-8193-3p | 1 | 1 |
| MIMAT0032801 | cel-miR-8194-5p | 1 | 1 |
| MIMAT0032807 | cel-miR-8197-5p | 1 | 1 |
| MIMAT0032813 | cel-miR-8200-5p | 1 | 1 |
| MIMAT0032824 | cel-miR-8204-3p | 1 | 1 |
| MIMAT0032828 | cel-miR-8205-3p | 1 | 1 |
| MIMAT0032831 | cel-miR-8207-5p | 1 | 1 |
| MIMAT0032844 | cel-miR-8212-5p | 1 | 1 |
