# Supplementary material
Source: publisher figshare collection journal article supplement (https://gsajournals.figshare.com/articles/dataset/_/8852180)

Figure S6

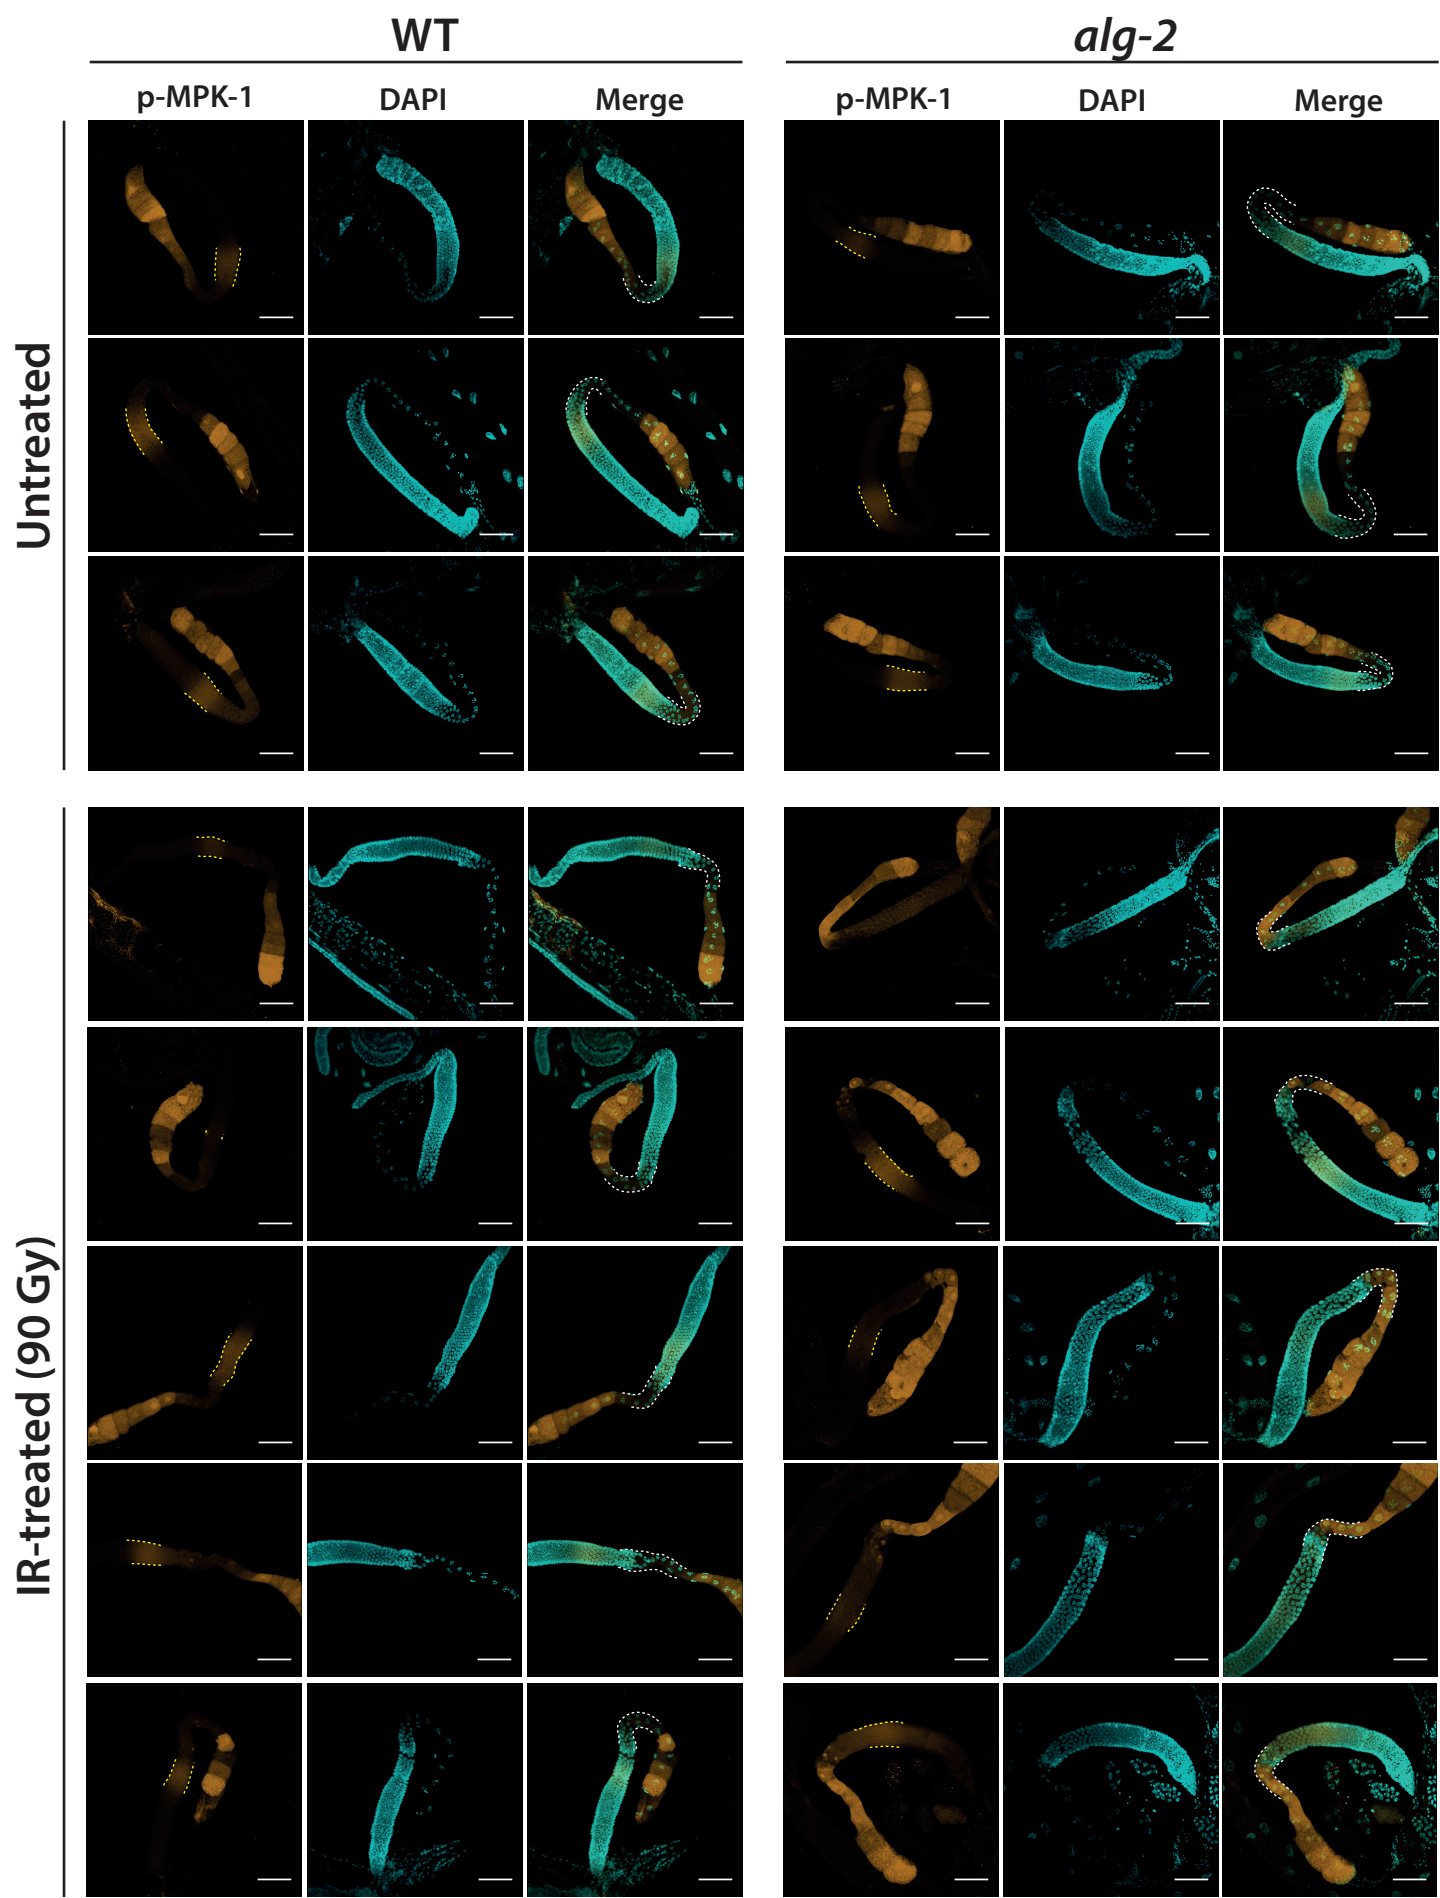

Supplement: Supplementary file 1 [file 1]

Figure S11

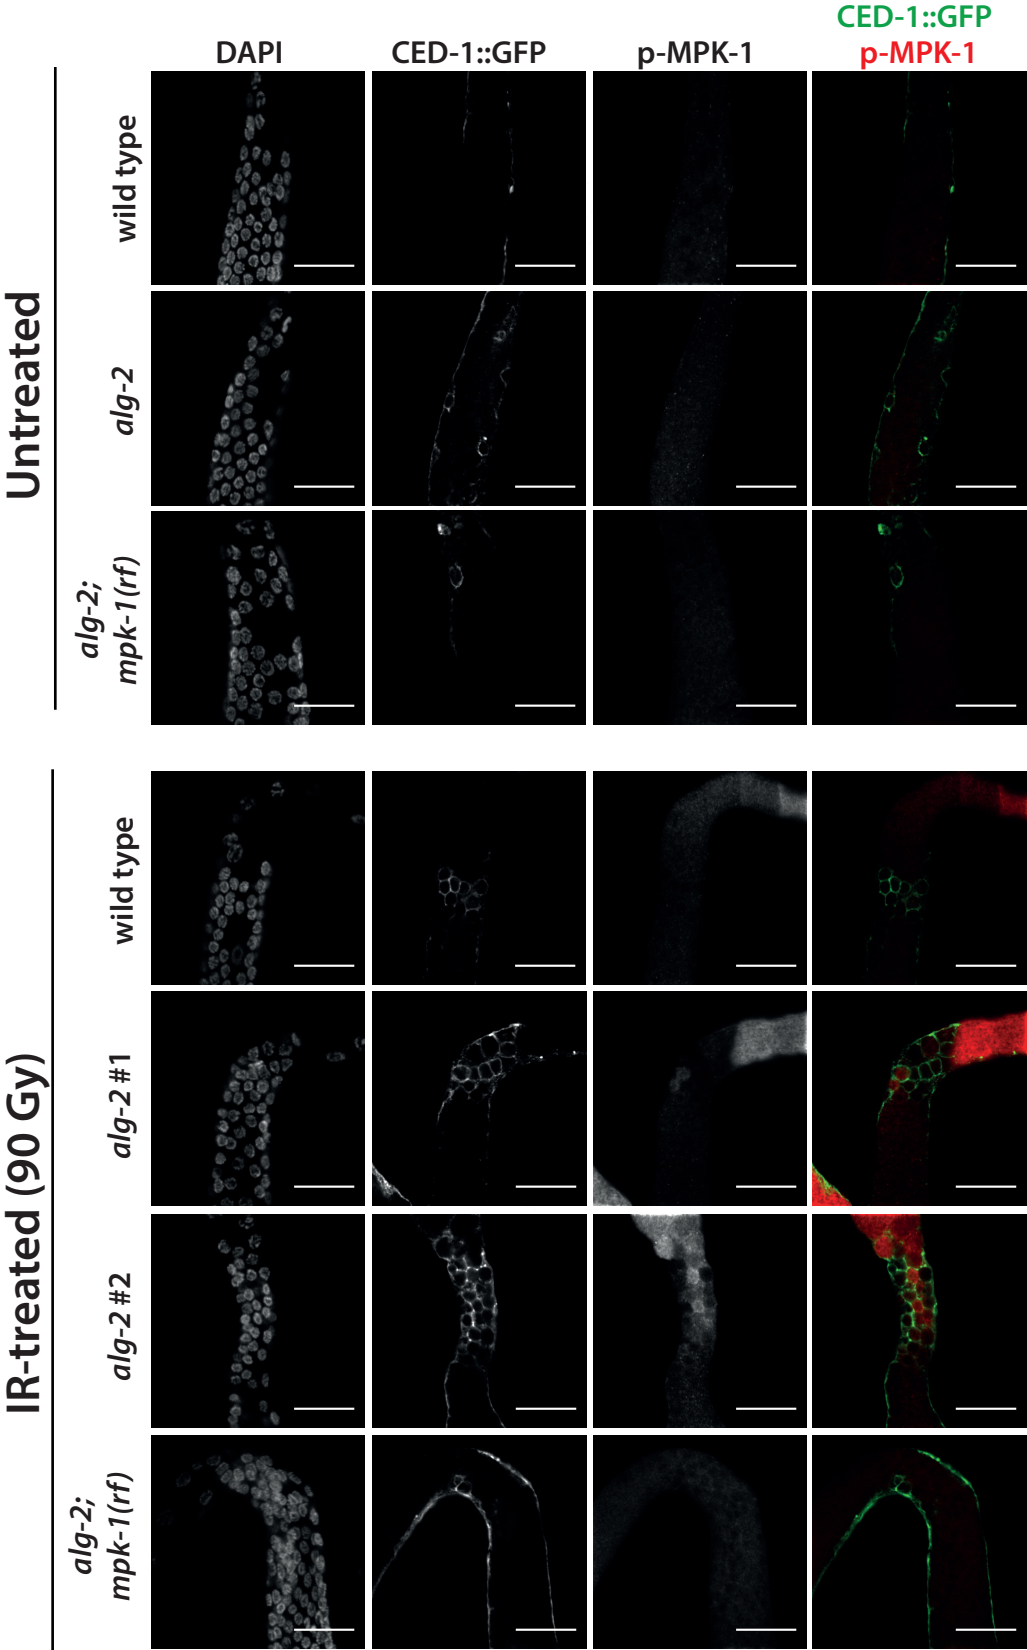

Supplement: Supplementary file 3 [file 1]

Figure S7

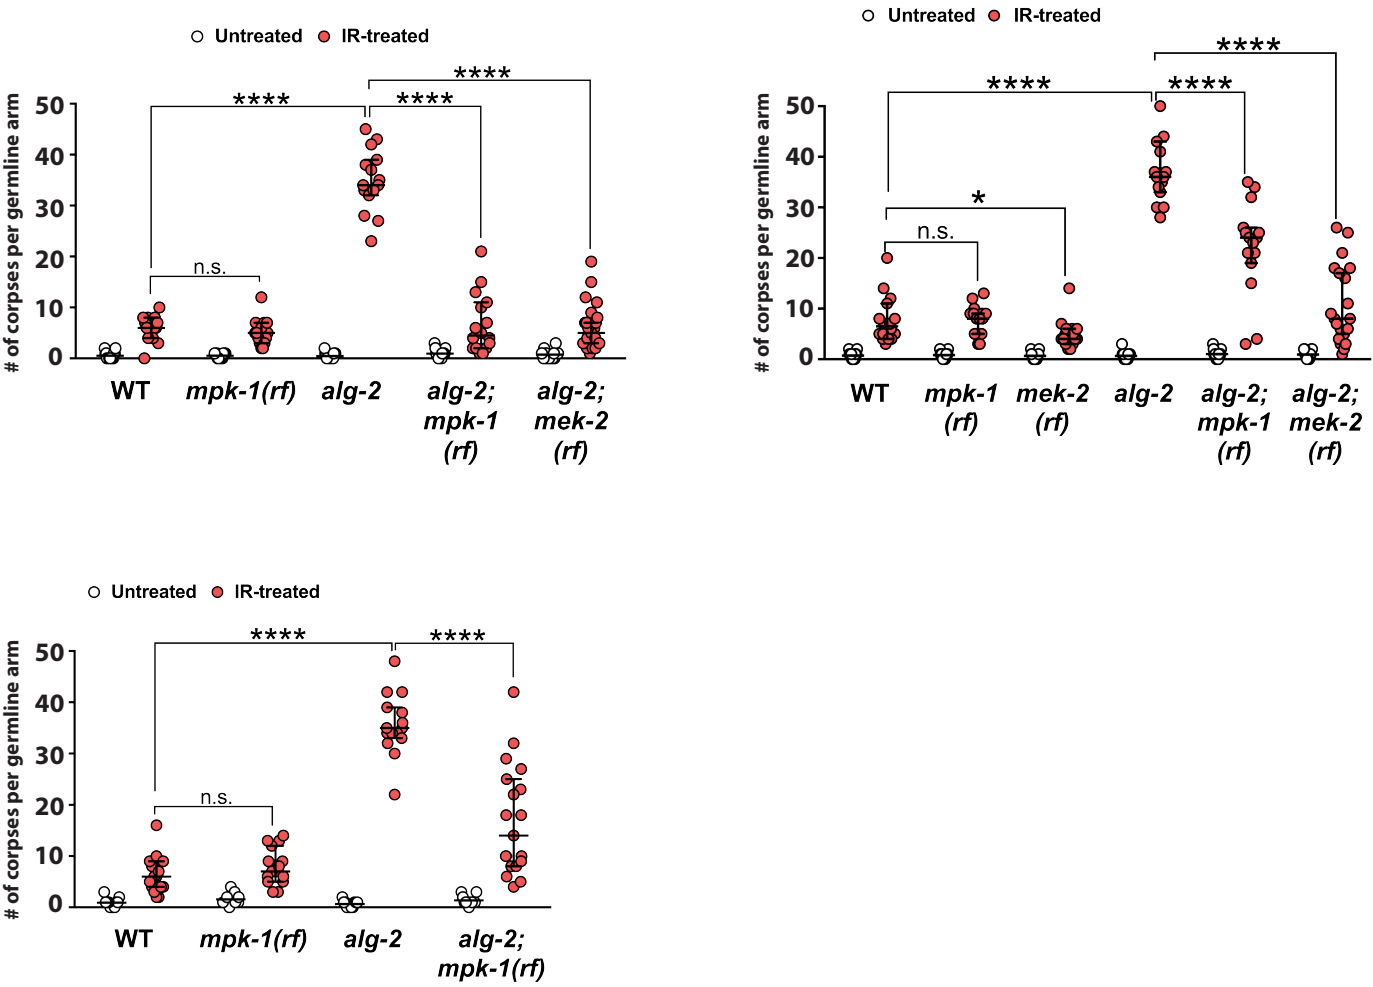

Supplement: Supplementary file 4 [file 1]

Figure S4

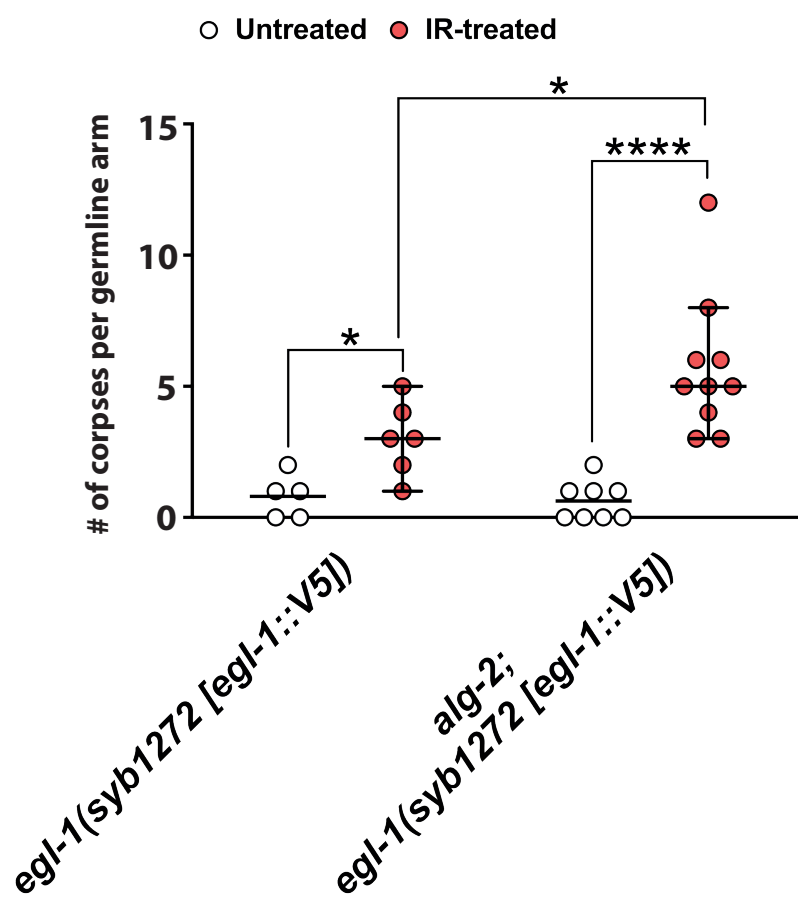

Supplement: Supplementary file 5 [file 1]

Figure S12

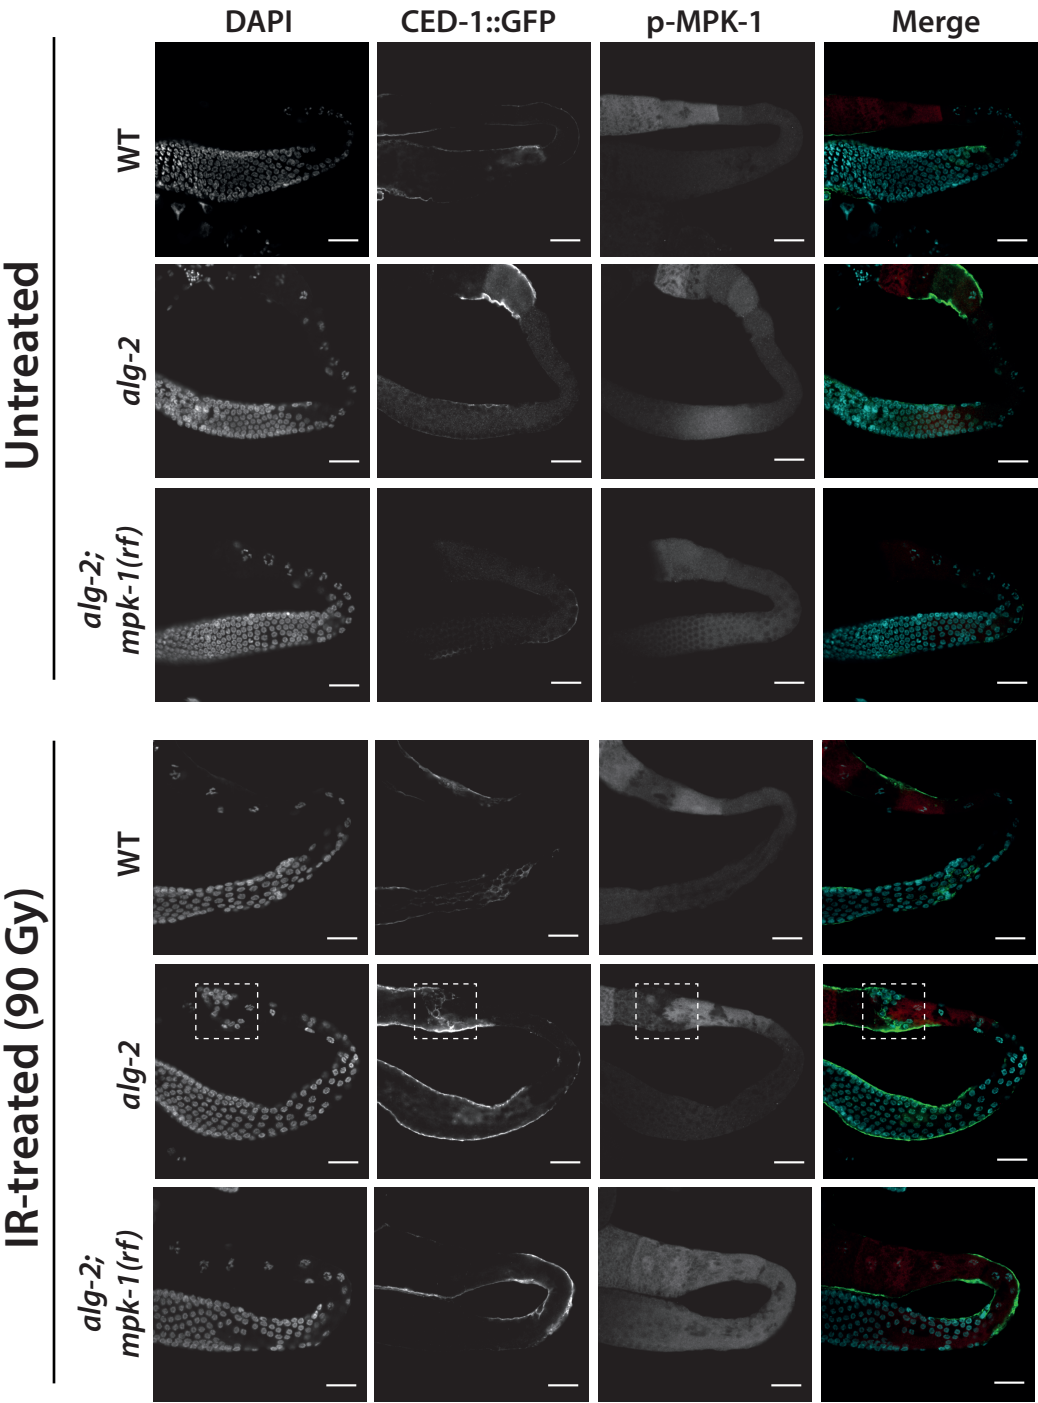

Supplement: Supplementary file 6 [file 1]

Figure S3

A

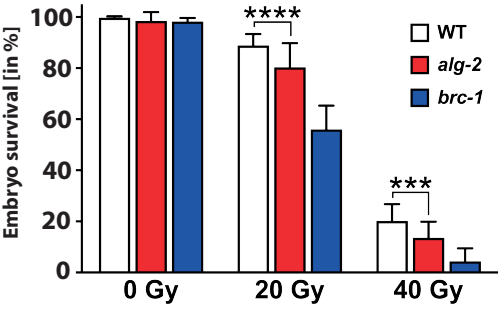

B

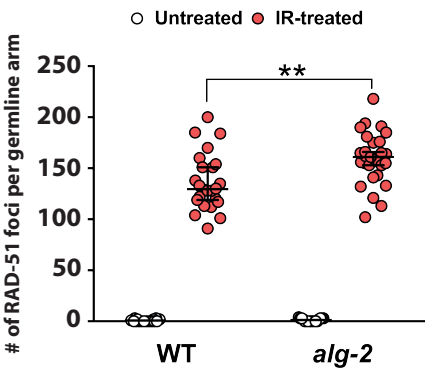

C

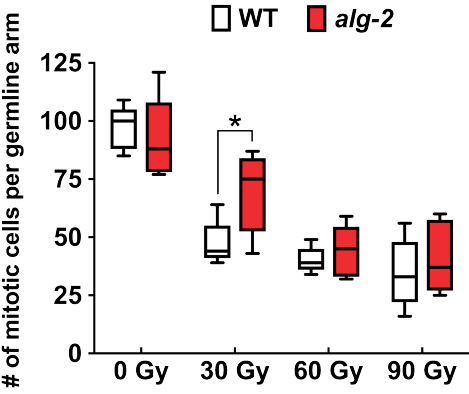

Supplement: Supplementary file 7 [file 1]

Figure S10

A

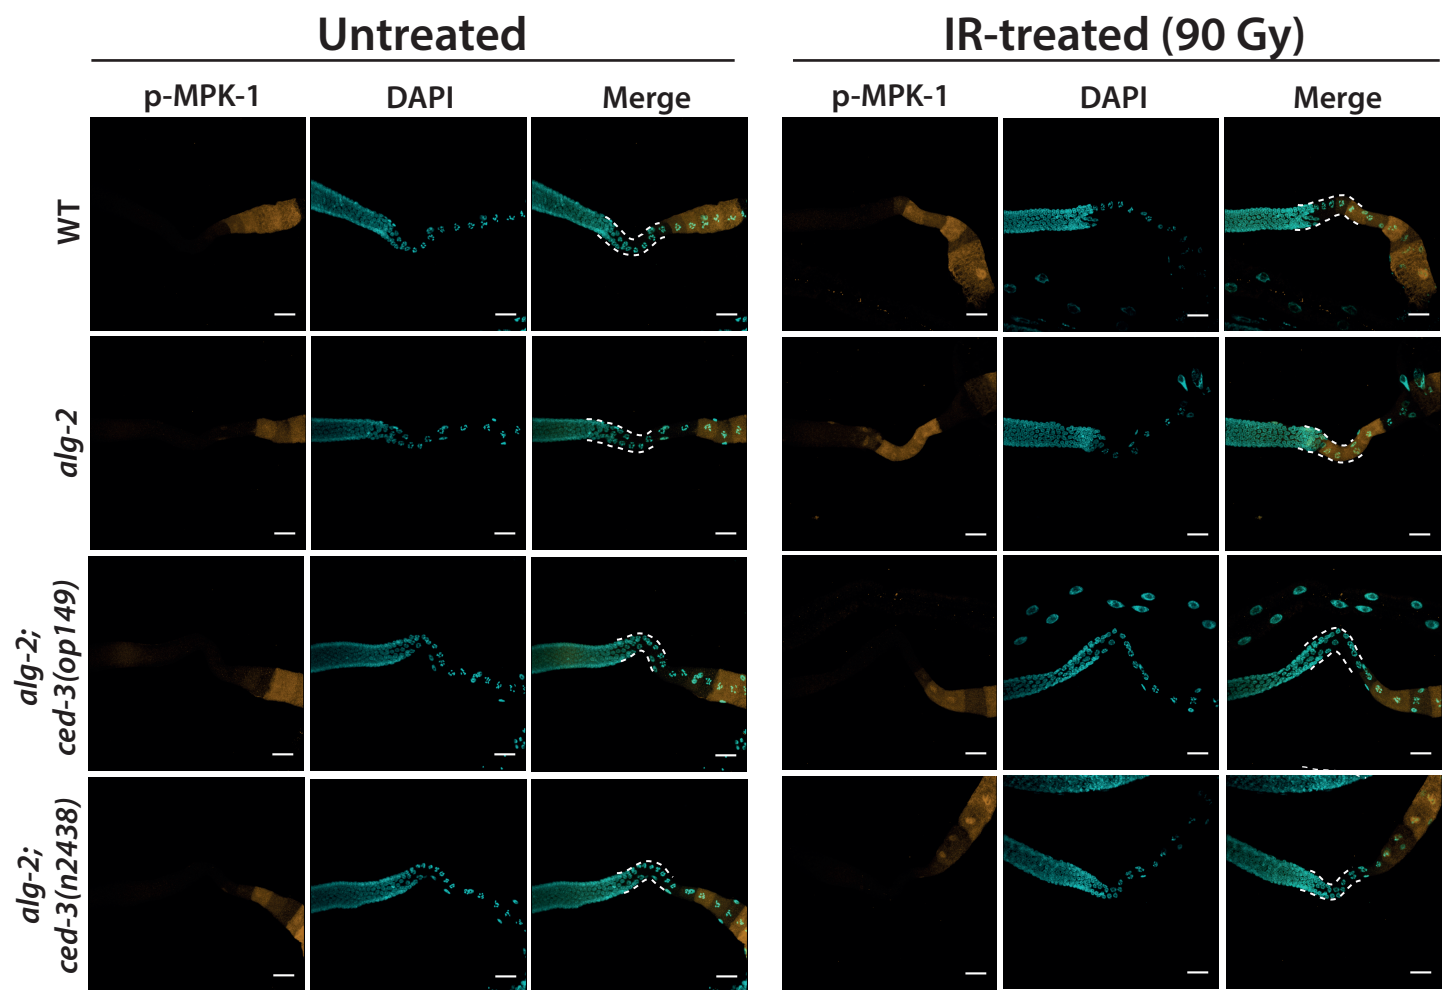

B

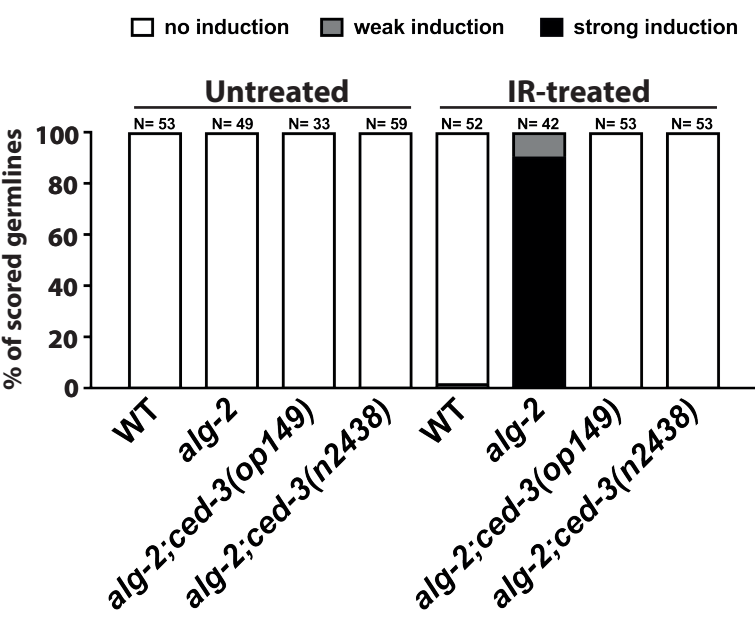

C

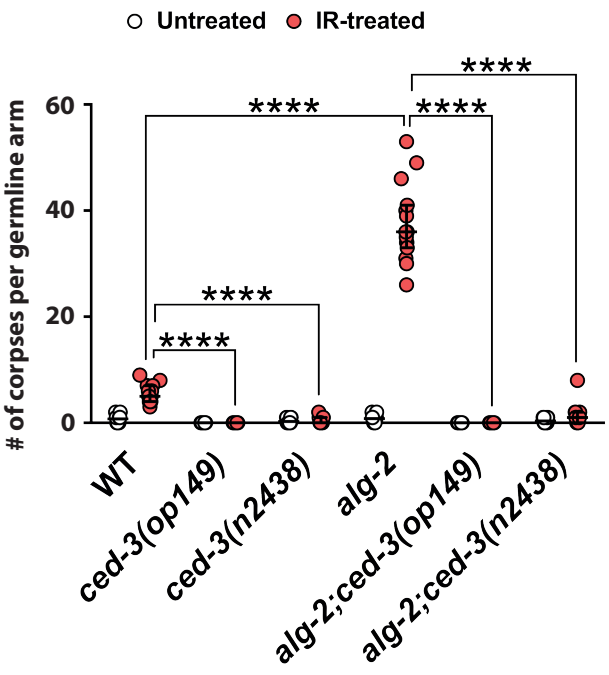

Supplement: Supplementary file 10 [file 1]

Figure S8

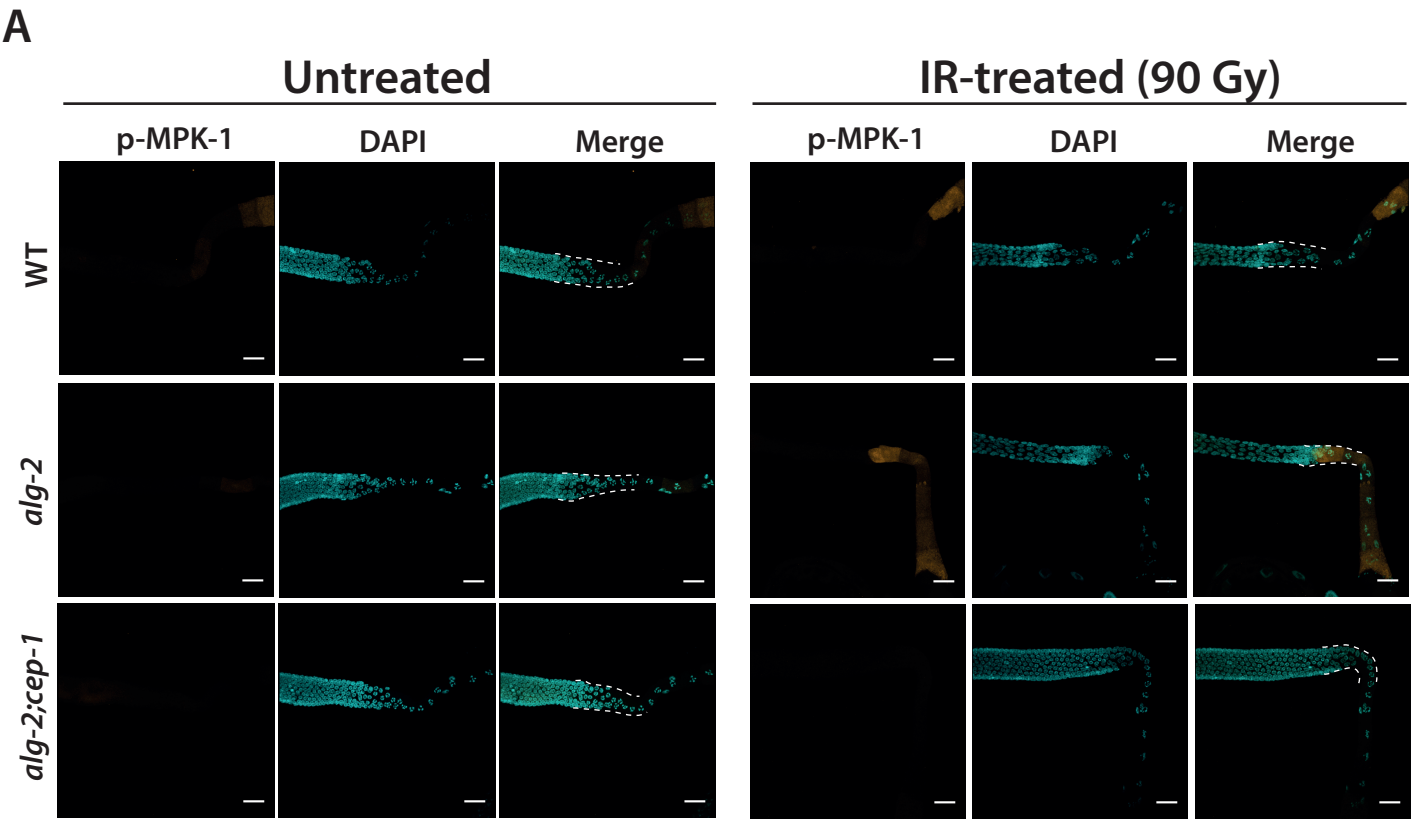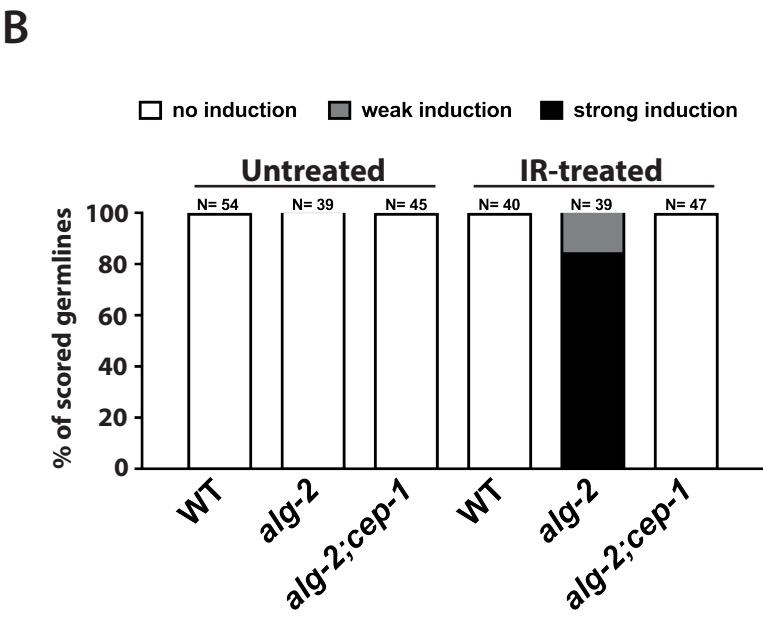

Supplement: Supplementary file 13 [file 1]

Figure S1

**A**

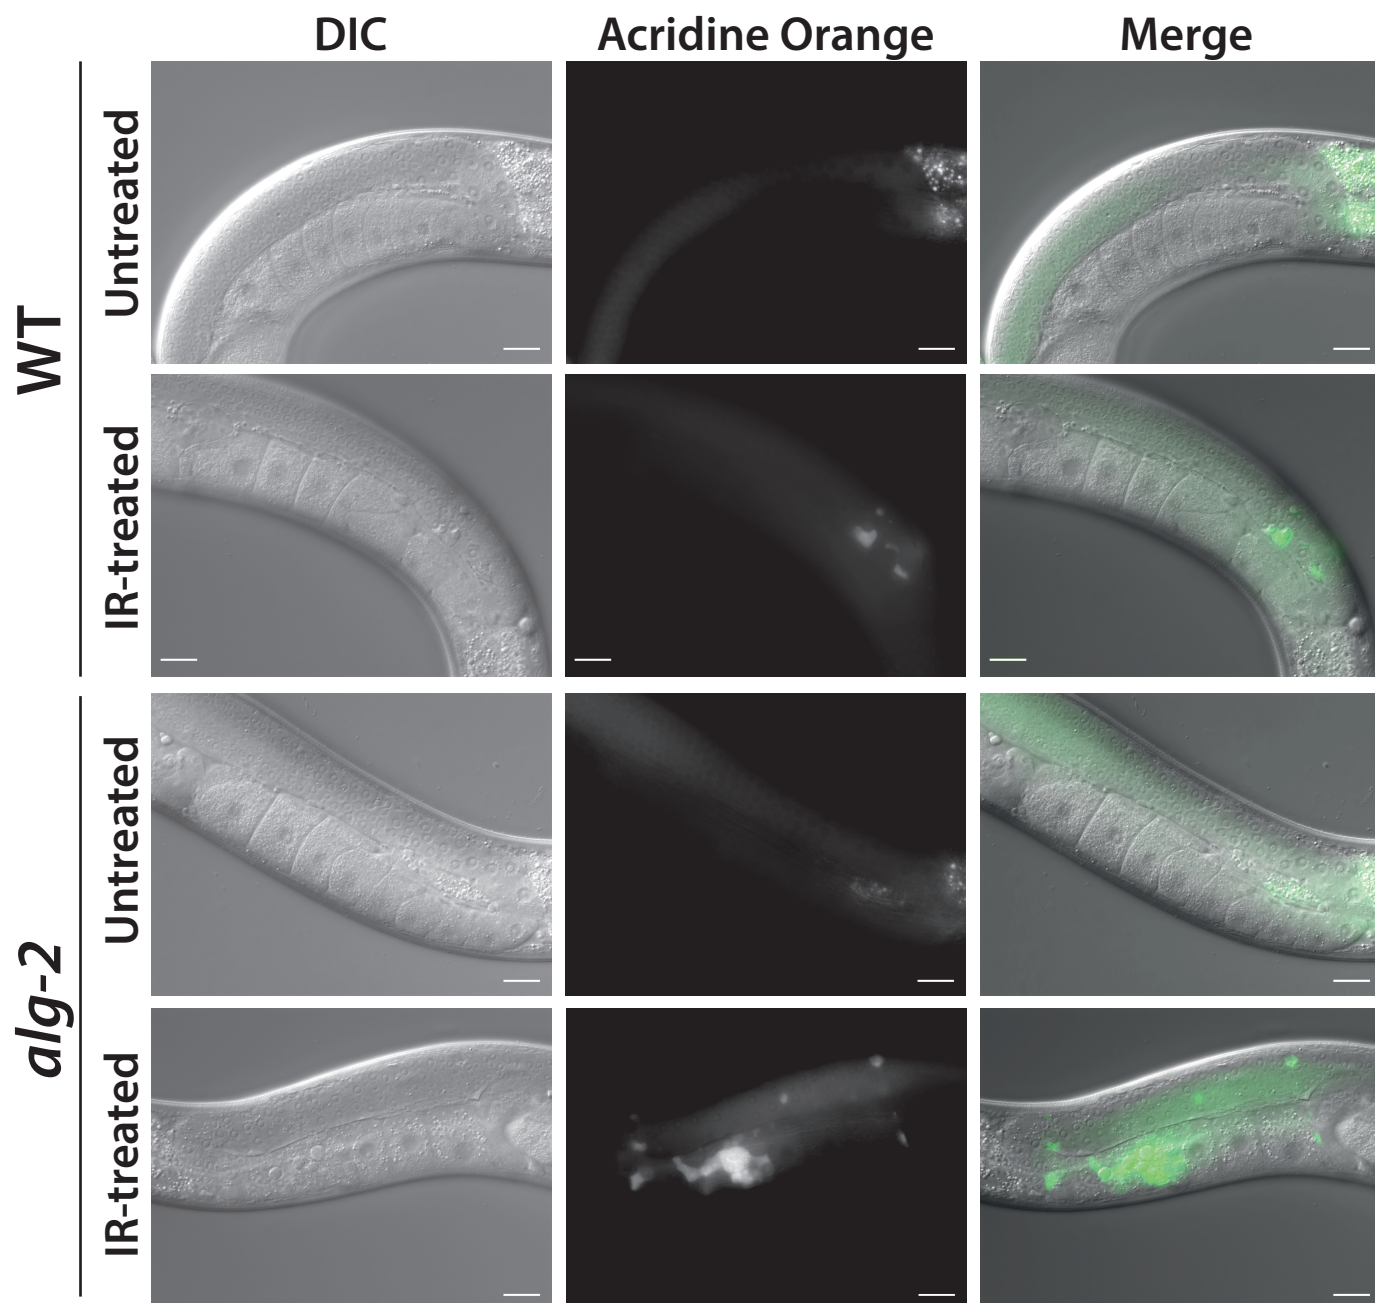

**B**

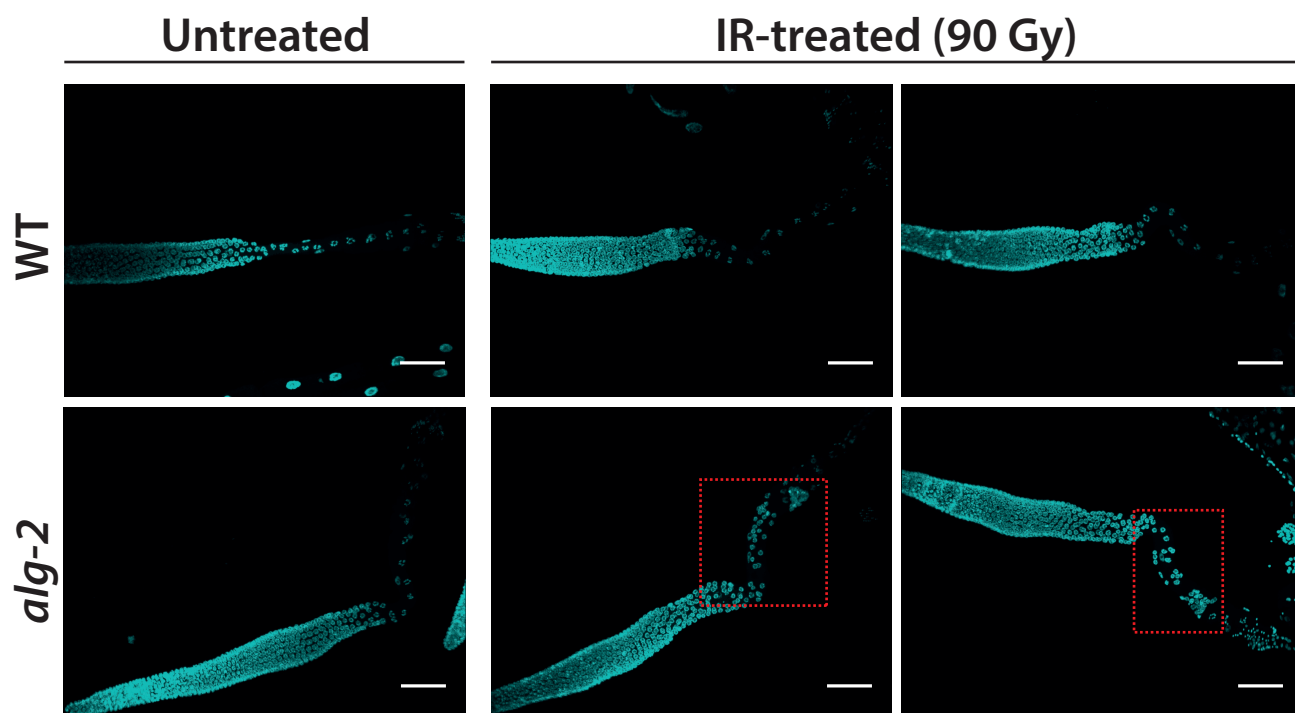

Supplement: Supplementary file 14 [file 1]

Figure S9

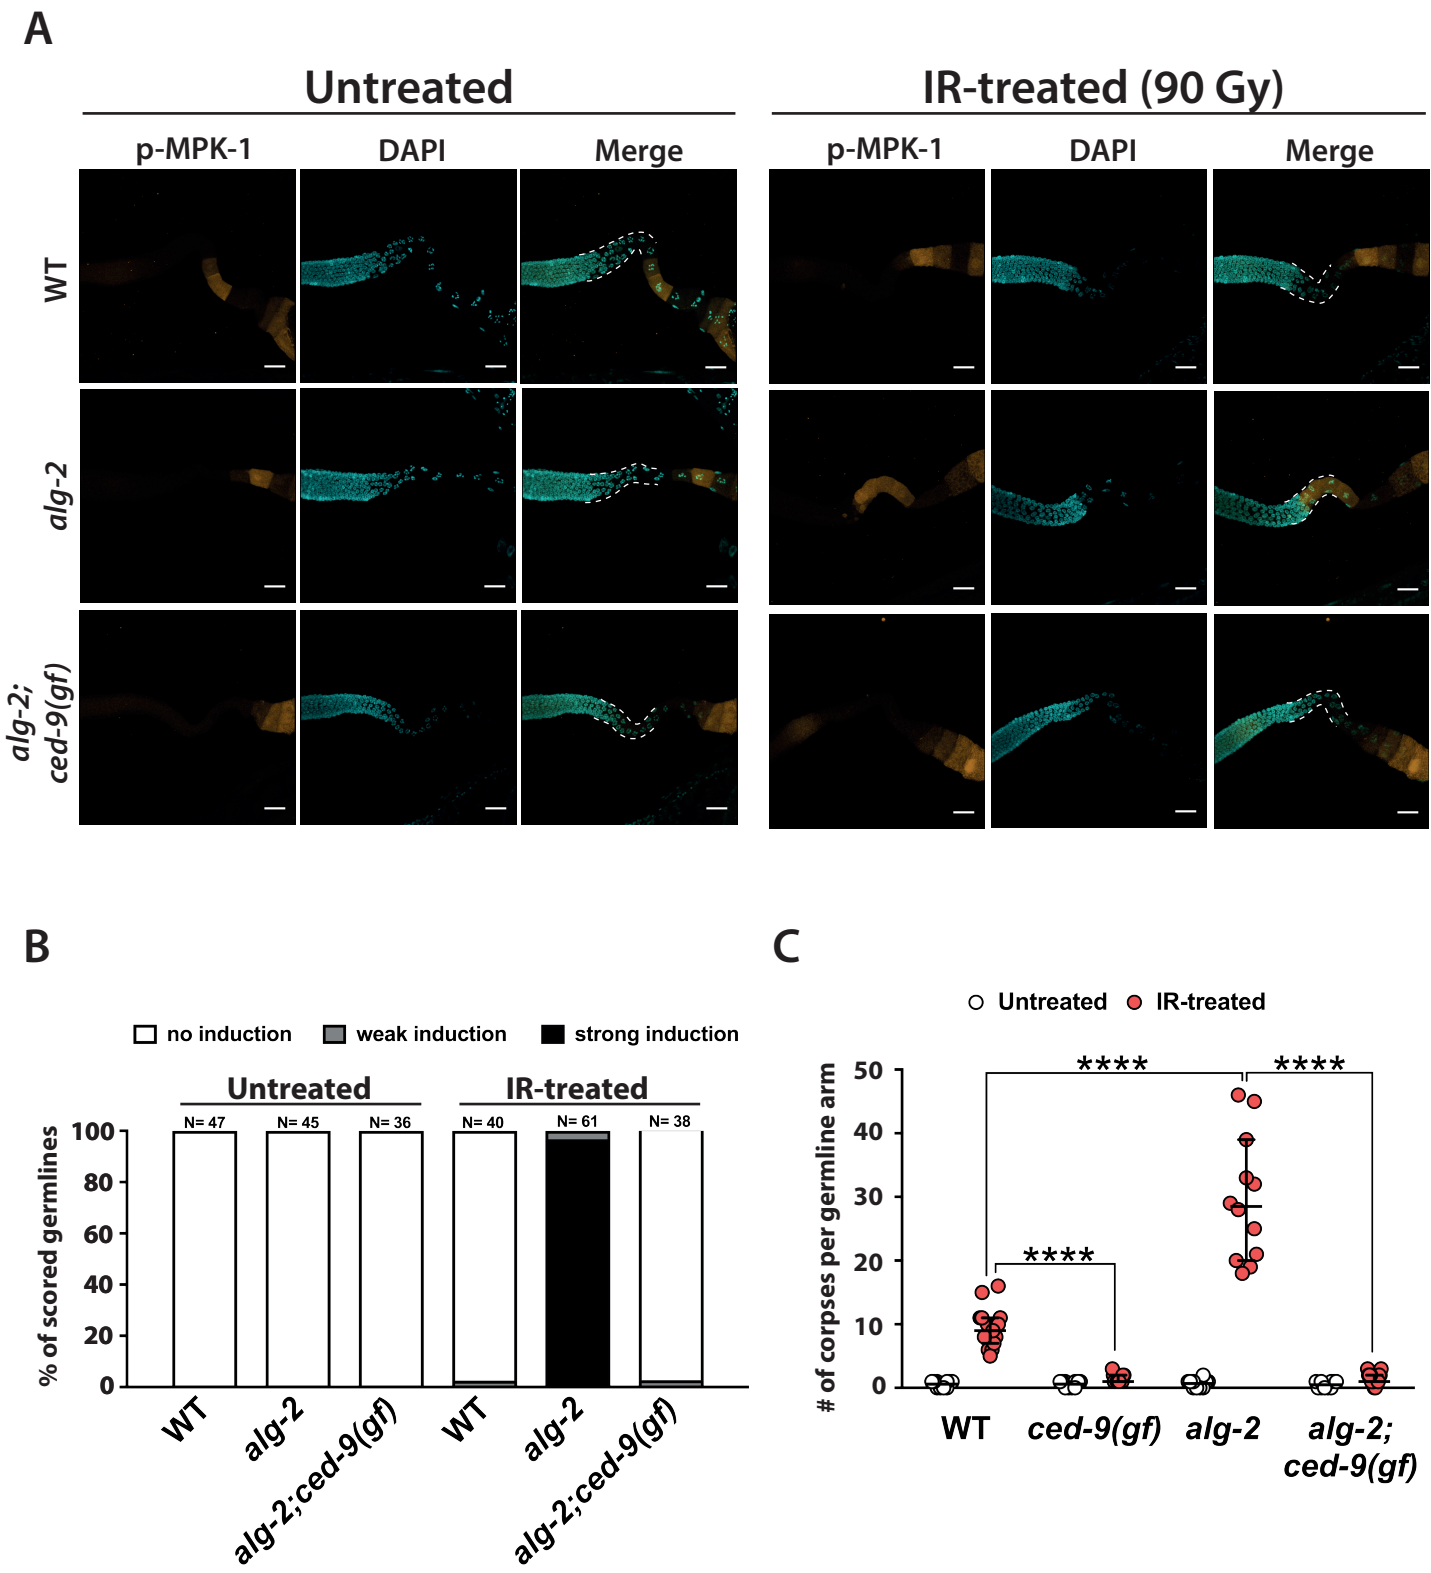

Supplement: Supplementary file 15 [file 1]

Figure S5

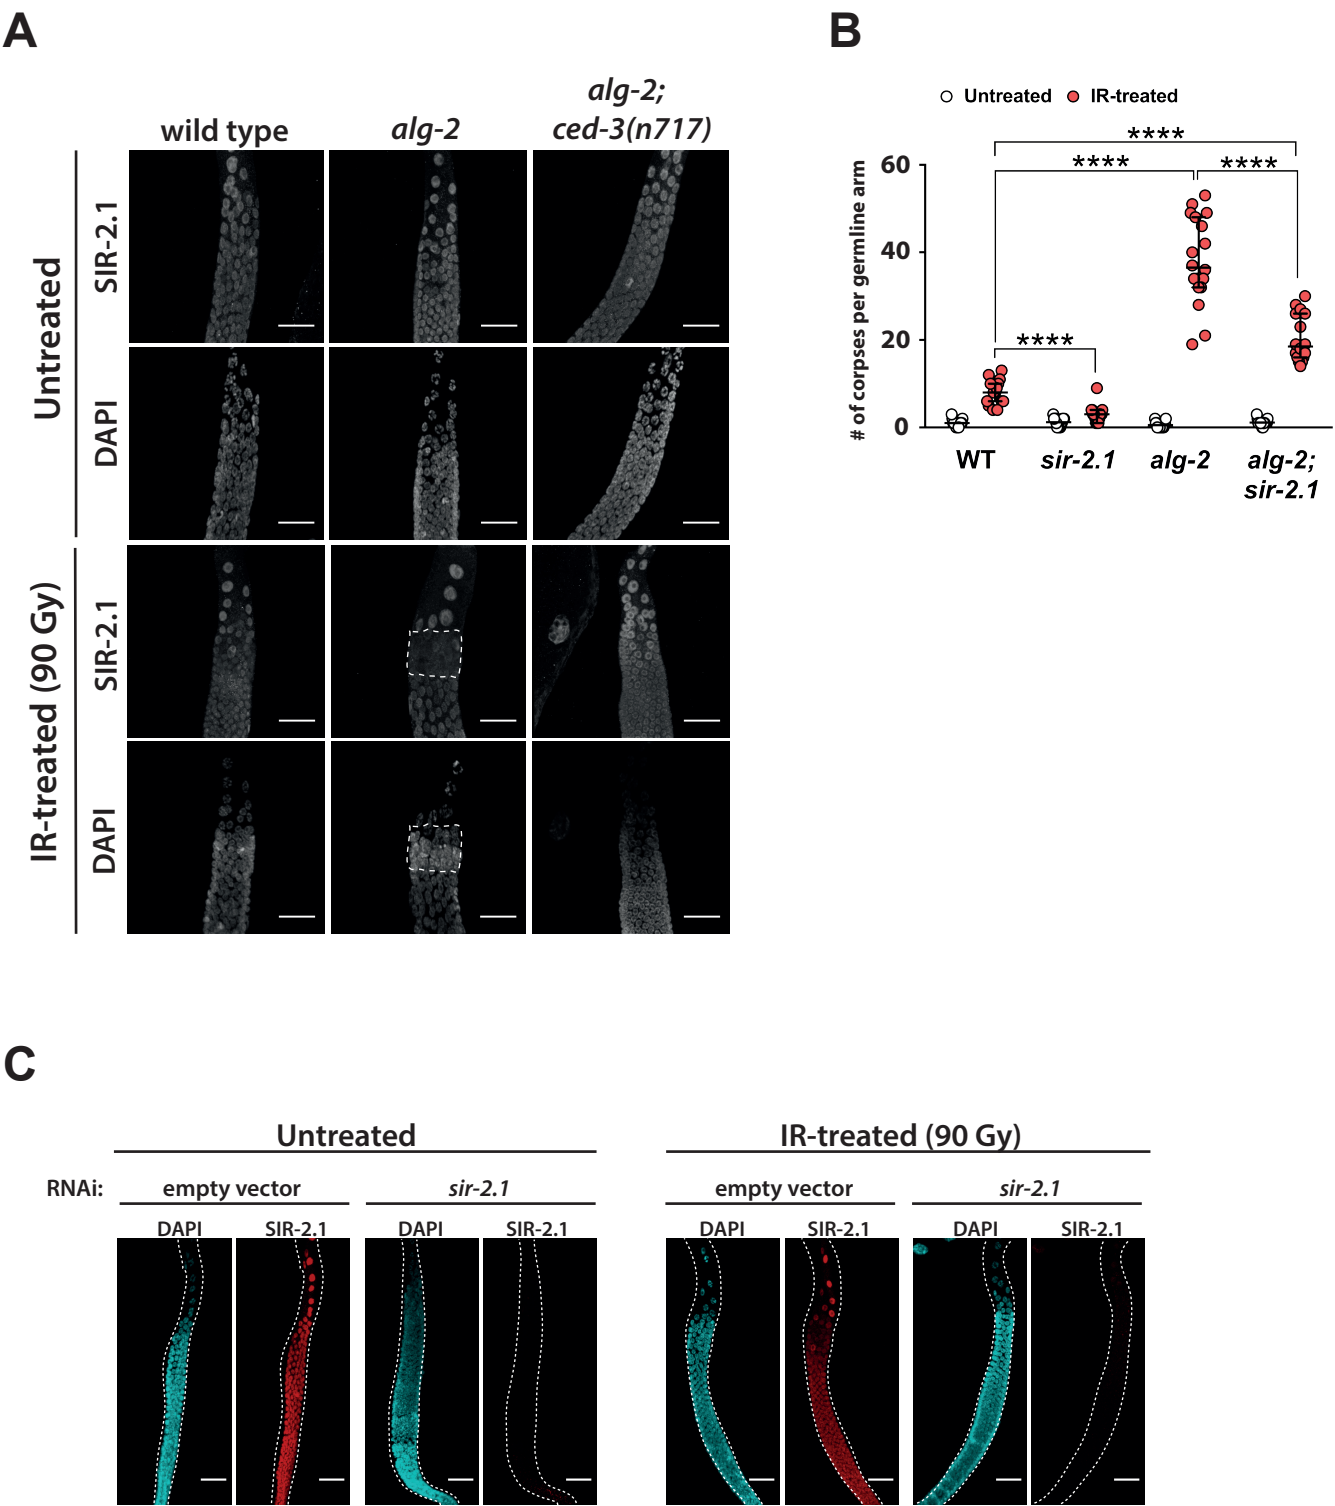

Supplement: Supplementary file 16 [file 1]
